# Supplementary material for: Risks and benefits of urinary catheterisation during inpatient diuretic therapy for acute heart failure: a retrospective, non-inferiority, cohort study
Source: PubMed Central journal article supplement — BMJ Open. 2022 Aug 4;12(8):e053632. doi: 10.1136/bmjopen-2021-053632 (PMC9362793; doi:10.1136/bmjopen-2021-053632), 2022-08-04
Supplement: bmjopen-2021-053632.draft_revisions.pdf [file bmjopen-2021-053632.draft_revisions.pdf]

# BMJ Open

BMJ Open is committed to open peer review. As part of this commitment we make the peer review history of every article we publish publicly available.

When an article is published we post the peer reviewers' comments and the authors' responses online. We also post the versions of the paper that were used during peer review. These are the versions that the peer review comments apply to.

The versions of the paper that follow are the versions that were submitted during the peer review process. They are not the versions of record or the final published versions. They should not be cited or distributed as the published version of this manuscript.

BMJ Open is an open access journal and the full, final, typeset and author-corrected version of record of the manuscript is available on our site with no access controls, subscription charges or pay-per-view fees (<http://bmjopen.bmj.com>).

If you have any questions on BMJ Open's open peer review process please email [info.bmjopen@bmj.com](mailto:info.bmjopen@bmj.com)

# BMJ Open

## Risks and benefits of urinary catheterisation during inpatient diuretic therapy for acute congestive heart failure: A retrospective, non-inferiority, cohort study

|                               |                                                                                                                                                                                                                                                                                                                                                                                                                                                                                                                                                                                                                                                                                          |
|-------------------------------|------------------------------------------------------------------------------------------------------------------------------------------------------------------------------------------------------------------------------------------------------------------------------------------------------------------------------------------------------------------------------------------------------------------------------------------------------------------------------------------------------------------------------------------------------------------------------------------------------------------------------------------------------------------------------------------|
| Journal:                      | <i>BMJ Open</i>                                                                                                                                                                                                                                                                                                                                                                                                                                                                                                                                                                                                                                                                          |
| Manuscript ID                 | bmjopen-2021-053632                                                                                                                                                                                                                                                                                                                                                                                                                                                                                                                                                                                                                                                                      |
| Article Type:                 | Original research                                                                                                                                                                                                                                                                                                                                                                                                                                                                                                                                                                                                                                                                        |
| Date Submitted by the Author: | 18-May-2021                                                                                                                                                                                                                                                                                                                                                                                                                                                                                                                                                                                                                                                                              |
| Complete List of Authors:     | John, Gregor; Hôpitaux Universitaires Genève, Department of Internal Medicine; Université de Genève, Department of Medicine<br>Arcens, Marc; Hôpitaux Universitaires Genève, Department of Medicine<br>Berra, Gregory; Hôpitaux Universitaires Genève, Department of Medicine<br>Garin, Nicolas; Hôpitaux Universitaires Genève, Department of Medicine; Université de Genève<br>Carballo, David ; Université de Genève; Hôpitaux Universitaires Genève, Department of Medicine<br>Carballo, Sebastian; Hôpitaux Universitaires Genève, Department of Medicine; Université de Genève<br>Stirnemann, Jerome; Hôpitaux Universitaires Genève, Department of Medicine; Université de Genève |
| Keywords:                     | Heart failure < CARDIOLOGY, Urinary tract infections < UROLOGY, Health & safety < HEALTH SERVICES ADMINISTRATION & MANAGEMENT                                                                                                                                                                                                                                                                                                                                                                                                                                                                                                                                                            |
|                               |                                                                                                                                                                                                                                                                                                                                                                                                                                                                                                                                                                                                                                                                                          |

SCHOLARONE™  
Manuscripts

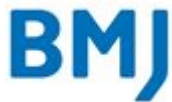

I, the Submitting Author has the right to grant and does grant on behalf of all authors of the Work (as defined in the below author licence), an exclusive licence and/or a non-exclusive licence for contributions from authors who are: i) UK Crown employees; ii) where BMJ has agreed a CC-BY licence shall apply, and/or iii) in accordance with the terms applicable for US Federal Government officers or employees acting as part of their official duties; on a worldwide, perpetual, irrevocable, royalty-free basis to BMJ Publishing Group Ltd ("BMJ") its licensees and where the relevant Journal is co-owned by BMJ to the co-owners of the Journal, to publish the Work in this journal and any other BMJ products and to exploit all rights, as set out in our [licence](#).

The Submitting Author accepts and understands that any supply made under these terms is made by BMJ to the Submitting Author unless you are acting as an employee on behalf of your employer or a postgraduate student of an affiliated institution which is paying any applicable article publishing charge ("APC") for Open Access articles. Where the Submitting Author wishes to make the Work available on an Open Access basis (and intends to pay the relevant APC), the terms of reuse of such Open Access shall be governed by a Creative Commons licence – details of these licences and which [Creative Commons](#) licence will apply to this Work are set out in our licence referred to above.

Other than as permitted in any relevant BMJ Author's Self Archiving Policies, I confirm this Work has not been accepted for publication elsewhere, is not being considered for publication elsewhere and does not duplicate material already published. I confirm all authors consent to publication of this Work and authorise the granting of this licence.

1 **Title:** Risks and benefits of urinary catheterisation during inpatient  
2  
3  
4 diuretic therapy for acute congestive heart failure: A retrospective, non-  
5  
6 inferiority, cohort study  
7  
8  
9

10 **Running headline:** urinary catheterisation in acute heart failure.  
11  
12  
13

14 Gregor John<sup>1,2,3\*</sup>, Marc Arcens<sup>2</sup>, Gregory Berra<sup>2</sup>, Nicolas Garin<sup>2,3</sup>, David Carballo<sup>3,4</sup>,  
15  
16 Sebastian Carballo<sup>2,3</sup>, Jérôme Stirnemann<sup>2,3</sup>.  
17  
18  
19  
20

21 1. Department of Internal Medicine, Neuchâtel Hospital Network, Rue de la Maladière  
22  
23 45, CH-2000 Neuchâtel, Switzerland  
24  
25

26 2. Department of Medicine, Geneva University Hospitals (HUG), Gabrielle-Perret-  
27  
28 Gentil 4, CH-1205 Geneva, Switzerland; Fax: 0041 32 967 27 29, Phone: 0041 79  
29  
30 559 59 29; gregor.john@h-ne.ch (may be published).  
31  
32

33 3. Geneva university, Michel-Servet 1, 1211 Genève 4, Switzerland.  
34

35 4. Cardiology Service, Department of Medicine, Geneva University Hospitals (HUG),  
36  
37 Gabrielle-Perret-Gentil 4, CH-1205 Geneva, david.carballo@hcuge.ch  
38  
39  
40  
41

42 **\*Gregor John<sup>1,2,3\*</sup>**, PD, MD (correspondence and requests for reprints); Department  
43  
44 of Internal Medicine, Neuchâtel Hospital Network, Rue de la Maladière 45, CH-2000  
45  
46 Neuchâtel, Switzerland. Fax: 0041 32 967 27 29, Phone: 0041 79 559 59 29;  
47  
48 gregor.john@h-ne.ch (may be published).  
49  
50  
51  
52

53 **Number of References:** 23, **Tables:** 2, **Figures:** 3, and **Appendix:** 0  
54  
55  
56  
57

58 **Word counts:** Abstract: 288; Text: 2916  
59  
60

1  
2  
3  
4  
5  
6  
7  
8  
9  
10  
11  
12  
13  
14  
15  
16  
17  
18  
19  
20  
21  
22  
23  
24  
25  
26  
27  
28  
29  
30  
31  
32  
33  
34  
35  
36  
37  
38  
39  
40  
41  
42  
43  
44  
45  
46  
47  
48  
49  
50  
51  
52  
53  
54  
55  
56  
57  
58  
59  
60

**Keywords:** Heart-failure, diuretics, urinary catheter, non-inferiority study, hospital readmission, mortality

For peer review only

## ABSTRACT:

**Objectives:** Patients with acute congestive heart failure (HF) regularly undergo urinary catheterisation (UC) at hospital admission. Little evidence exists on the real benefit of using UC in patients treated by diuretics for HF. We aimed at exploring risks and clinical benefits of UC during inpatient diuretic therapy for acute congestive HF.

**Design:** retrospective, non-inferiority study.

**Setting:** Geneva University Hospitals' (HUG) Department of Medicine, a tertiary centre.

**Participants and intervention:** In a cohort of HF, patients catheterised within 24h of diuretic therapy (n=113) were compared with non-catheterised patients (n=346).

**Primary and secondary outcome measures:** The primary endpoint was the forty-eight hours weight loss after starting diuretic therapy. Secondary endpoints were the time needed to reach target weight, discontinuation of intravenous diuretics, and resolution of respiratory failure. Safety outcomes included the time to a first urinary tract infection UTI, first hospital readmission and death.

**Results:** Forty-eight hours weight loss was not statistically different between groups and the adjusted difference was below the non-inferiority boundary of 1kg (0.43 kg (95% CI: -0.03–0.88) in favour of UC,  $p < 0.01$  for non-inferiority). UC was not associated with time to reaching target weight (adjusted HR 1.0; 95%CI: 0.7–1.5), discontinuation of intravenous diuretics (aHR 0.9; 95%CI: 0.7–1.2), or resolution of respiratory failure (aHR 1.1; 95%CI: 0.5–2.4). UC increased the risk of urinary tract infection (aHR 2.5; 95%CI: 1.5–4.2). UC was not associated with hospital readmission (aHR 1.1, 95%CI: 0.8–1.4) or one-year mortality (aHR 1.4; 95%CI: 1.0–2.1).

1 **Conclusion:** The study demonstrated that UC within 24h of initiating diuretic treatment  
2  
3 had no impact on clinical improvement and increased risk of a urinary infection. This  
4  
5 evidence, therefore, argues against a systematic use of UC during a diuretic therapy  
6  
7 for HF.  
8  
9

## 10 11 12 13 14 **STRENGTHS AND LIMITATIONS OF THIS STUDY**

- 
- 17 • This is the first study to give an insight into the hypothetical clinically relevant  
18 benefits of UC in the context of HF.  
19
  - 20 • Using a register of prospective records and significant adjustments to potential  
21 confounding factors further strengthened our findings.  
22
  - 23 • The study's retrospective, observational approach only allowed us to  
24 hypothesise that urinary catheters were placed for HF management or to  
25 facilitate diuresis.  
26
  - 27 • Since patients are usually not weighed in emergency rooms, we focused on the  
28 weight change from days 1 to day 3. Thus, UC's impact during the first 24 h of  
29 diuretic therapy was not assessed.  
30
  - 31 • A randomised prospective design, with protocols to guide rapid diuretic  
32 adaptation, would be better able to explore the UC's real potential among HF  
33 patients. However, considering current evidence and risks, such a study may  
34 never occur.  
35  
36  
37  
38  
39  
40  
41  
42  
43  
44  
45  
46  
47  
48  
49  
50  
51  
52  
53  
54  
55  
56  
57  
58  
59  
60

## INTRODUCTION:

Heart failure (HF) is a major, growing, worldwide public health concern, affecting 2% of the developed world's population.[<sup>1</sup>] HF results in 1.7 million consultations and over 1 million hospitalisations yearly in the USA.[<sup>2</sup>] Since acute HF is the leading cause of hospitalisations in patients  $\geq 65$  years old, current demography will increase hospitalisation rates and health care costs.[<sup>1, 2</sup>]

Diuretics are the mainstay treatments for volume overload.[<sup>3, 4</sup>] Randomised studies of acute congestive HF have failed to associate either low or high initial doses of diuretics, or different modes of administration (continuous vs intermittent intravenous), with clinically significant differences in outcome.[<sup>5</sup>] Nevertheless, overly aggressive or insufficient treatments can result in acute kidney injury, electrolytic imbalance, low blood pressure, prolonged hospital length of stay (LOS) or early hospital readmission.[<sup>5, 6</sup>] Assessing adequate response to diuretics, e.g. measuring diuresis, is therefore important and enables rapid treatment adjustment. This may be as or even more useful than how diuretics are initially administered.

Between one quarter [<sup>7</sup>] and one half of patients hospitalised for HF undergoes indwelling urinary catheter placement.[<sup>8</sup>] Indications for UC in this population include managing hypervolemia [<sup>8, 9</sup>] or improving comfort during diuretic treatment.[<sup>10</sup>] By maximising the elimination of liquids while avoiding excessive losses, UC can have a positive impact on hospital LOS, readmission rates and even death. Although the benefits of UC remain uncertain, the risks of increased infectious and non-infectious complications are well known.[<sup>8, 11, 12</sup>] A recent retrospective study of catheterised HF



1 patients showed no impact on LOS and an increased risk of infection.<sup>[8]</sup> Little  
2  
3 evidence exists on UC's impact on clinically relevant improvements such as weight  
4  
5 loss, time to improvement of respiratory failure or time to discontinuation of  
6  
7 intravenous therapy. The present study aimed to determine the risks and clinical  
8  
9 benefits of UC among patients hospitalised for congestive HF.  
10  
11  
12  
13  
14  
15  
16

## 17 **MATERIALS AND METHODS**

21 We conducted a retrospective, non-inferiority, cohort study using a pre-existing registry  
22  
23 of patients admitted to Geneva University Hospitals' (HUG) Department of Medicine  
24  
25 for acute HF.<sup>[13, 14]</sup> Patients signed an informed consent at inclusion and were followed  
26  
27 for one year or until death. Data on weight, in-hospital diuretic use, UC and predefined  
28  
29 outcomes were obtained from paper medical charts, electronic medical records,  
30  
31 laboratory databases and Switzerland's national deaths registry. The institutional  
32  
33 review board approved the study and the need for informed consent to collect  
34  
35 retrospectively new information, was waived by the ethical committee (Comission  
36  
37 cantonale d'éthique de la recherche (CCER)). Reporting and analyses were performed  
38  
39 according to the Strengthening the Reporting of Observational Studies in Epidemiology  
40  
41 (STROBE) statement.  
42  
43  
44  
45  
46  
47  
48  
49

### 50 **STUDY POPULATION**

51  
52  
53 All patients  $\geq 18$  years old and included in the HF registry between 01.01.2006 and  
54  
55 01.01.2010 were eligible.<sup>[13, 14]</sup> Patients were included in the registry if primarily  
56  
57 admitted for acute decompensated HF, with or without volume overload. Patients  
58  
59  
60

1 without available paper medical charts for the index admission or who did not receive  
2 diuretics during their first seven days of hospitalisation were excluded. We compared  
3 patients who underwent UC within 24 h of diuretic therapy initiation with those not  
4 catheterised.  
5  
6  
7  
8  
9

## 10 11 12 13 14 15 **OUTCOMES**

16  
17 The primary endpoint was the 48 h weight loss after starting diuretic therapy.  
18 Secondary endpoints were persistent excess weight at 72 h and at one week, the time  
19 needed to reach clinical improvement (reaching target weight (+/- 0.5 kg),  
20 discontinuation of intravenous diuretics, oxygen supply and continuous positive airway  
21 pressure (CPAP)), and hospital LOS.  
22  
23  
24  
25  
26  
27  
28  
29  
30  
31

32 Safety outcomes included the proportion of patients with a urinary tract infection (UTI),  
33 initial diuretic treatment failure, worsening kidney function and episodes of low blood  
34 pressure, and time to a first UTI, first hospital readmission and death. Initial treatment  
35 failure was defined as a need for increased doses of diuretics, or a switch from oral to  
36 intravenous diuretic therapy or from a bolus to a continuous intravenous diuretic  
37 therapy two days or more after the initiation of diuretics. Diuretic dose increases before  
38 that point were considered to be usual treatment adjustments.  
39  
40  
41  
42  
43  
44  
45  
46  
47  
48  
49  
50  
51

## 52 53 **DATA COLLECTION**

54  
55 Data extracted from medical charts included pre-admission diuretic use, micturition  
56 volumes during diuretic therapy, weight at discharge and, for the first seven days, daily  
57  
58  
59  
60

1 information on the UC, weight, diuretics administration, clinical parameters, oxygen  
2 supply and use of CPAP therapy.  
3  
4  
5  
6  
7  
8  
9

10 Target weight was defined as the patient's weight at discharge or, when unavailable,  
11 the lowest weight during hospitalisation that did not result in increased creatinaemia or  
12 low blood pressure. We calculated excess weight by subtracting target weight from  
13 weights measured during hospitalisation. Since patients are not always weighed on  
14 admission day, 48 h weight loss was calculated between days 1 and 3 after starting  
15 diuretic therapy (day 0). When weight on day 1 or on day 3, was missing, we took  
16 double the mean daily weight loss calculated between day 0 to day 4.  
17  
18  
19  
20  
21  
22  
23  
24  
25  
26  
27  
28  
29

30 Respiratory failure was defined as the need for oxygen supply or CPAP. We noted  
31 episodes of low blood pressure (systolic pressure < 100 mmHg) and the need for  
32 saline perfusion. Daily doses of torasemide were multiplied by four and doses of oral  
33 furosemide were divided by two to convert daily diuretics use into an equivalent  
34 intravenous furosemide dosage.  
35  
36  
37  
38  
39  
40  
41  
42  
43  
44  
45

46 We obtained patients' habitual kidney function from their general practitioner.[<sup>14</sup>]  
47 Kidney function at hospital admission and during the first week was extracted from the  
48 laboratory database. When kidney function at admission was lower than its usual  
49 value, acute kidney injury (AKI) was defined using the KDIGO classification, as  
50 previously published by the same authors.[<sup>14</sup>] When kidney function decreased during  
51 hospitalisation compared to admission values, it was defined as worsening kidney  
52 function and scored according to the KDIGO classification.[<sup>14</sup>]  
53  
54  
55  
56  
57  
58  
59  
60

1  
2  
3  
4 Comorbidity burdens were summarised using Charlson index, calculated using the  
5 CIM-10 codes from electronic medical charts.<sup>[15]</sup> HF types were stratified into  
6  
7 intermediate or reduced left ventricular ejection fraction (LVEF < 49%), preserved  
8  
9 LVEF (LVEF > 50%) and unknown LVEF.  
10  
11  
12  
13  
14  
15  
16

17 We extracted urinary and blood culture information from the microbiology laboratory  
18  
19 database for each febrile episode during hospitalisation. A diagnosis of UTI was  
20  
21 defined as bacterial growth of  $10E^3$  colony-forming units in a urine sample plus the  
22  
23 corresponding symptoms of a UTI.  
24  
25  
26  
27  
28  
29

30 Information on death was obtained from Switzerland's national deaths registry and  
31  
32 Geneva University Hospitals' (the only public hospital in the canton) electronic  
33  
34 databases. We reviewed charts for hospital LOS, place of discharge (home vs  
35  
36 rehabilitation centre or care home), and all-cause and HF-related hospital  
37  
38 readmissions within one year.  
39  
40  
41  
42

#### 43 **PATIENT AND PUBLIC INVOLVEMENT**

44  
45 Patients were not involved in the study design or conduct.  
46  
47

#### 48 **STATISTICS**

49  
50  
51 For our analyses, timings (day 0) were set from the first day of diuretic use, which could  
52  
53 differ from the hospital admission day.  
54  
55  
56

#### 57 *Primary analysis and weight evolution*

58  
59  
60

1 Weight loss analyses during diuretic treatment were restricted to patients with volume  
2 overload (excess weight at diuretic therapy). The primary analysis used a linear  
3 regression model, where the 48 h weight loss was the dependent variable and UC was  
4 the independent variable. The model was adjusted for age (continuous), sex (binary),  
5 Charlson index score (continuous), pre-admission diuretic dose (continuous), HF type  
6 (categorical), admission heart rate and blood pressure (continuous), respiratory failure  
7 (binary), weight excess at diuretic therapy (continuous), first diuretic dose (continuous),  
8 use of continuous intravenous diuretics (binary), AKI (categorical) and admission  
9 through the emergency room (binary). Adjustment factors were chosen based on  
10 clinical expertise. To reach non-inferiority, the upper confidence interval of a between-  
11 group difference had to be less than 1 kg (in favour of UC). The 1 kg boundary was  
12 arbitrarily chosen as a clinically relevant threshold. Unilateral T-test served to test non-  
13 inferiority.

14  
15  
16  
17  
18  
19  
20  
21  
22  
23  
24  
25  
26  
27  
28  
29  
30  
31  
32 We performed three sensitivity analyses for the main outcome. Firstly, multiple  
33 imputation method was used to replace missing values. Missing data, which were all  
34 5% or less, were inspected to ensure that the missing at random assumption was  
35 reasonable. Imputation involved all baseline responders and utilised the variables in  
36 the adjusted models. Missing data were imputed using chained equations. Twenty  
37 imputed datasets were generated and parameter estimates were combined using  
38 Rubin's rules. The second sensitivity analysis excluded patients with urinary retention.  
39  
40  
41  
42  
43  
44  
45  
46  
47  
48  
49  
50  
51  
52  
53  
54  
55  
56  
57  
58  
59  
60  
The third matched catheterised patients 1:1 to non-catheterised patients according to  
sex and the closest value (< 10%) of a propensity score. The score included all the  
variables mentioned above except sex. A paired t-test was used to test mean  
differences.

1 We used linear regression, adjusted for confounders, to explore associations between  
2 UC and persistent weight excess at 72 h and one week. We also tested the interaction  
3 between UC and time in a mixed-effects model adjusted for the factors mentioned  
4 above. A random intercept for each patient accounted for repeated measures across  
5 days. The mean expected excess weights of patients with and without UC was  
6 calculated assuming mean values for continuous predictors and a proportion of  
7 positive categorical predictors similar to the study sample.  
8  
9  
10  
11  
12  
13  
14  
15  
16  
17  
18  
19  
20

### 21 *Clinical improvements, safety outcomes and other analyses*

22  
23  
24 The unadjusted impact of UC on time-dependent outcomes was analysed using  
25 Kaplan–Meier survival analysis and an unweighted, two-sided, log-rank test to  
26 compare groups. Analysis of target weight was restricted to patients with volume  
27 overload. Analyses of intravenous diuretics, oxygen supply and CPAP were restricted  
28 to patients receiving those therapies. Multivariate Cox models were adjusted for age,  
29 sex and Charlson comorbidity index score. For target weight and the time needed to  
30 discontinue intravenous diuretics, Cox models were further adjusted for all the  
31 confounding factors in the primary analysis. The proportional hazards assumption was  
32 verified using Schoenfeld residuals and a visual inspection of the log-minus-log plots.  
33  
34  
35  
36  
37  
38  
39  
40  
41  
42  
43  
44  
45  
46  
47

48 The association between UC and LOS was tested using a linear regression model  
49 adjusted for confounding factors and in which LOS was log-transformed to correct for  
50 skewed data. Logistic regression was used to adjust binary outcomes for  
51 confounders. Comparisons of characteristics between groups were performed using  
52 the chi-squared test or Fisher's exact test, where appropriate, for categorical  
53 variables. The Mann–Whitney test was used for continuous variables as these were  
54  
55  
56  
57  
58  
59  
60

1 not normally distributed. Except for the primary outcomes, all analyses were two-  
2 sided, with a significance level set at 5%. All analyses were performed using STATA,  
3  
4 version 12.0, and R statistical software, Version 4.0.0.[<sup>16</sup>]  
5  
6  
7  
8  
9  
10  
11

## 12 RESULTS

13  
14  
15  
16 Of 640 potential participants in the HF register, 174 had no available paper medical  
17 chart and 7 had had no diuretic therapy within the first 7 days, leaving a cohort of 459  
18 patients of whom 113 underwent UC within the first 24 h (24.6%). Only four of these  
19 patients had documented urinary retention. Catheterised patients were older, more  
20 often women, more frequently experienced respiratory failure or AKI, and received  
21 higher initial diuretic doses (**Table 1**). Urinary catheters were placed for a median of 4  
22 days (IQR: 2–8). Diuresis was recorded more often among patients with UC (58.0%)  
23 than patients without (41.2%,  $p < 0.01$ ).  
24  
25  
26  
27  
28  
29  
30  
31  
32  
33  
34  
35  
36  
37  
38

### 39 EXCESS WEIGHT UNDER DIURETIC THERAPY

40  
41  
42 At diuretic therapy initiation, 342 patients carried excess weight and were included in  
43 the primary analysis. In adjusted linear regressions, being catheterised was not  
44 associated with significantly greater 48 h weight loss than not being catheterised  
45 (0.43 Kg in favour of UC (95% CI: -0.03–0.88)). The upper confidence interval of  
46 between-group difference was below the non-inferiority boundary of 1 kg ( $p < 0.01$  for  
47 non-inferiority).  
48  
49  
50  
51  
52  
53  
54  
55

56  
57 In sensitivity analysis, the results were in line with the primary analysis. The difference  
58 in 48 h weight loss, after multiple imputation for missing values, was 0.33 kg (95% CI:  
59  
60

1 -0.1–0.76;  $p < 0.01$  for non-inferiority). Excluding patients with urinary retention ( $n = 4$ )  
2  
3 did not change the results (data not shown). In the last sensitivity analysis, 64 patients  
4  
5 with UC were matched with 64 patients without one (none had urinary retention). The  
6  
7 difference in weight loss was 0.29 kg (95% CI: -0.3–0.88;  $p < 0.01$  for non-inferiority).  
8  
9

10  
11  
12  
13  
14  
15 Patients with UC did not have a statistically lower persistent excess weight at 72 h: the  
16  
17 difference was 0.27 kg (95% CI: -0.52–1.1;  $p = 0.50$ ) in unadjusted and 0.24 kg  
18  
19 (95% CI: -0.17–0.64;  $p < 0.001$  for non-inferiority) in adjusted linear regression. At one  
20  
21 week, the excess weight difference between patients with and without UC was -0.09 kg  
22  
23 (95% CI: -1.0–0.8;  $p = 0.84$ ) in unadjusted and -0.14 kg (95% CI: -0.89–0.60;  $p = 0.01$   
24  
25 for non-inferiority) in adjusted linear regression. Similarly, there was no statistically  
26  
27 significant interaction between UC and daily excess weight changes in the mixed-  
28  
29 effects model ( $p = 0.55$ ; **Figure 1**).  
30  
31  
32  
33  
34  
35  
36  
37

### 38 **CLINICAL IMPROVEMENT**

39  
40  
41 Time to reach target weight and time needed to discontinue CPAP were not statistically  
42  
43 different between patients with and without UC in both unadjusted and adjusted  
44  
45 analysis (**Figure 2, Table 2**). UC tended to be associated with a longer time to  
46  
47 discontinuation of an intravenous diuretic or discontinuation of oxygen supply (**Figure**  
48  
49 **2**), but the associations disappeared after adjustment for confounders (**Table 2**).  
50  
51  
52  
53  
54  
55  
56  
57  
58  
59  
60



1 The median hospital LOS was identical for patients with and without UC (12 days, IQR:  
2 9–18). However, fewer UC patients were discharged directly home from hospital  
3 (57.3% vs 73.7%; adjusted OR 0.6 (95% CI: 0.3–0.9;  $p < 0.01$ )).  
4  
5  
6  
7  
8  
9  
10  
11

## 12 SAFETY OUTCOMES

13  
14  
15 The proportions of initial treatment failures, low blood pressure episodes and patients  
16 with worsening kidney function were not statistically different between groups (**Table**  
17 **2**).  
18  
19  
20  
21  
22  
23  
24  
25  
26

27 All-cause and HF-related readmissions were not statistically different between patients  
28 with and without UC (**Table 2** and **Figure 3**). Half the patients with UC and one third  
29 without UC were dead at one year. The difference was not statistically significant after  
30 adjustment (**Table 2**).  
31  
32  
33  
34  
35  
36  
37  
38  
39

40 UC patients were at a higher risk of suffering from a UTI, and this association persisted  
41 in adjusted analyses (**Table 2** and **Figure 3**). Multiple UTIs occurred in 9 UC patients  
42 (8.0%) and in 5 patients without UC (1.2%,  $p < 0.01$ ). Patients with a UTI had a longer  
43 hospital LOS (15 days (IQR: 10–21) vs 11 days (IQR: 8–17),  $p < 0.001$ ) and an  
44 increased one-year mortality rate (52.5% vs 34.0%, adjusted HR 1.5; 95% CI: 1.1–2.3;  
45  $p = 0.038$ ).  
46  
47  
48  
49  
50  
51  
52  
53  
54  
55  
56  
57

## 58 DISCUSSION AND CONCLUSION

1 Among patients admitted to medical wards for acute HF, initial weight loss was not  
2  
3 different for the strategy of abstaining from UC compared to UC placement within the  
4  
5 first 24 h. Besides, UC had no impact on clinical improvement such as the time needed  
6  
7 to reach target weight, discontinue intravenous diuretics or improve respiratory failure,  
8  
9 and hospital LOS. Furthermore, UC did not prevent excessive diuresis resulting in low  
10  
11 blood pressure episodes or worsening kidney function. However, UC was associated  
12  
13 with a higher risk of a UTI.  
14  
15  
16  
17  
18  
19  
20

21 There are few appropriate indications for UC,<sup>[11]</sup> and 7% to 50% of UCs are done  
22  
23 outside these indications.<sup>[17, 18]</sup> Rates of UC subsequent to HF vary greatly and could  
24  
25 be very high. In one study, more than half of haemodynamically stable patients  
26  
27 underwent UC.<sup>[8]</sup> The rationale for UC in HF is weak yet somehow based on beliefs  
28  
29 that it facilitates urine elimination and increases comfort by decreasing toilet visits.  
30  
31 However, there is good evidence that UC does not increase the comfort of patients  
32  
33 undergoing diuretic therapy, even at high dosages.<sup>[10]</sup> Most guidelines on UC good  
34  
35 practice do not list HF as a standard indication.<sup>[19]</sup> Through their *Choosing Wisely*  
36  
37 campaigns, Swiss and American authorities recommend avoiding in-dwelling UC for  
38  
39 urine output monitoring in stable patients who can void or for patient or staff  
40  
41 convenience.<sup>[20, 21]</sup> Indication lists, authorities' recommendations and financial  
42  
43 penalties have reduced the overall inappropriate use of UC.<sup>[11]</sup> An American study  
44  
45 showed that the proportion of UC among HF patients decreased by 8% between 2009  
46  
47 and 2014.<sup>[7]</sup>  
48  
49  
50  
51  
52  
53  
54  
55  
56  
57  
58  
59  
60

1 Catheter-associated UTIs (CAUTIs) are the second most common infections  
2 associated with patients hospitalised for HF after *Clostridium*-related infections.[<sup>22</sup>]  
3  
4 Previous reports among HF patients found associations between CAUTI and increased  
5  
6 risks of discharge to a skilled care facility, longer hospital LOS, higher total hospital  
7  
8 costs and in-hospital mortality.[<sup>8, 22</sup>] Condom catheters are a better option when  
9  
10 diuresis affects older patients with a disability: they lead to fewer complications,[<sup>23</sup>] are  
11  
12 more comfortable and are less painful than UC.[<sup>10</sup>]  
13  
14  
15  
16  
17  
18  
19  
20  
21

22 The present study is the first to give an insight into the hypothetical clinically relevant  
23 benefits of UC in the context of HF. Using a register of prospective records and  
24 significant adjustments to potential confounding factors (some collected  
25 retrospectively) further strengthened our findings. However, the study has limitations.  
26  
27 Firstly, the study's retrospective, observational approach only allowed us to  
28 hypothesise that urinary catheters were placed for HF management or to facilitate  
29 diuresis. To minimise these issues, we only selected UCs which occurred in the first  
30 24 h of diuretic therapy. Secondly, since patients are usually not weighed in emergency  
31 rooms, we focused on the weight change from days 1 to day 3. Thus, UC's impact  
32 during the first 24 h of diuretic therapy was not assessed. A randomised prospective  
33 design, with protocols to guide rapid diuretic adaptation, would be better able to explore  
34 the UC's real potential among HF patients. However, considering current evidence and  
35 risks, such a study may never occur. It is of note that records of the amount of urine  
36 passed were only available for half of the patients, with or without UC. Thus, checking  
37 for adequate diuresis after treatment with diuretics might be a simpler, safer  
38 recommendation than UC for improved HF management. Finally, some medical charts  
39  
40  
41  
42  
43  
44  
45  
46  
47  
48  
49  
50  
51  
52  
53  
54  
55  
56  
57  
58  
59  
60

1 could not be retrieved, but their unavailability was random and unrelated to their UC  
2 status or outcomes. Thus, there is little risk that unavailable charts biased the results.  
3  
4

5  
6  
7  
8  
9 UC within 24 h of diuretic therapy initiation had no proven impact on the clinically  
10 relevant outcomes of time to reach target weight, time to resolve respiratory failure and  
11 hospital LOS. The lack of benefits and the increased risk of a UTI preclude systematic  
12 UC for the management of HF.  
13  
14  
15  
16  
17

## 21 DATA AVAILABILITY

22  
23  
24  
25 The database, variable explanation, and Stata do-file (in Word format) are available at  
26 request to gregor.john@h-ne.ch.  
27  
28  
29  
30  
31  
32

## 34 REFERENCES

- 35  
36  
37 1. Savarese, G., Lund, L. H. Global Public Health Burden of Heart Failure. *Card Fail Rev.* **3**, 7-11  
38 (2017).  
39  
40  
41  
42 2. Benjamin, E. J. *et al.* Heart Disease and Stroke Statistics-2019 Update: A Report From the  
43 American Heart Association. *Circulation.* **139**, e56-e528 (2019).  
44  
45  
46  
47 3. Jessup, M. *et al.* 2009 focused update: ACCF/AHA Guidelines for the Diagnosis and  
48 Management of Heart Failure in Adults: a report of the American College of Cardiology  
49 Foundation/American Heart Association Task Force on Practice Guidelines: developed  
50 in collaboration with the International Society for Heart and Lung Transplantation.  
51  
52  
53  
54  
55  
56  
57  
58  
59  
60  
*Circulation.* **119**, 1977-2016 (2009).

- 1 4. McMurray, J. J. *et al.* ESC Guidelines for the diagnosis and treatment of acute and chronic  
2  
3 heart failure 2012: The Task Force for the Diagnosis and Treatment of Acute and  
4  
5 Chronic Heart Failure 2012 of the European Society of Cardiology. Developed in  
6  
7 collaboration with the Heart Failure Association (HFA) of the ESC. *Eur Heart J.* **33**, 1787-  
8  
9 847 (2012).
- 10  
11  
12  
13 5. Felker, G. M. *et al.* Diuretic strategies in patients with acute decompensated heart failure.  
14  
15 *N Engl J Med.* **364**, 797-805 (2011).
- 16  
17  
18 6. Felker, G. M., O'Connor, C. M., Braunwald, E. Loop diuretics in acute decompensated heart  
19  
20 failure: necessary? Evil? A necessary evil? *Circ Heart Fail.* **2**, 56-62 (2009).
- 21  
22  
23 7. Metersky, M. L. *et al.* National trends in the frequency of bladder catheterization and  
24  
25 physician-diagnosed catheter-associated urinary tract infections: Results from the  
26  
27 Medicare Patient Safety Monitoring System. *Am J Infect Control.* **45**, 901-04 (2017).
- 28  
29  
30 8. Jang, A. Y. *et al.* Routine Indwelling Urethral Catheterization in Acute Heart Failure Patients  
31  
32 Is Associated With Increased Urinary Tract Complications Without Improved Heart  
33  
34 Failure Outcomes. *Circ J.* **82**, 1632-39 (2018).
- 35  
36  
37 9. Aoki, T. Appropriate Use of Urinary Catheter in Acute Heart Failure Patients. *Circ J.* **82**, 1505-  
38  
39 06 (2018).
- 40  
41  
42 10. Saint, S. *et al.* Condom versus indwelling urinary catheters: a randomized trial. *J Am Geriatr*  
43  
44 *Soc.* **54**, 1055-61 (2006).
- 45  
46  
47 11. Meddings, J. *et al.* Reducing unnecessary urinary catheter use and other strategies to  
48  
49 prevent catheter-associated urinary tract infection: an integrative review. *BMJ Qual*  
50  
51 *Saf.* **23**, 277-89 (2014).
- 52  
53  
54 12. Hollingsworth, J. M. *et al.* Determining the noninfectious complications of indwelling  
55  
56 urethral catheters: a systematic review and meta-analysis. *Ann Intern Med.* **159**, 401-  
57  
58 10 (2013).
- 59  
60

- 1  
2  
3  
4  
5  
6  
7  
8  
9  
10  
11  
12  
13  
14  
15  
16  
17  
18  
19  
20  
21  
22  
23  
24  
25  
26  
27  
28  
29  
30  
31  
32  
33  
34  
35  
36  
37  
38  
39  
40  
41  
42  
43  
44  
45  
46  
47  
48  
49  
50  
51  
52  
53  
54  
55  
56  
57  
58  
59  
60
13. Garin, N. *et al.* Inclusion into a heart failure critical pathway reduces the risk of death or readmission after hospital discharge. *Eur J Intern Med.* **23**, 760-4 (2012).
14. Berra, G. *et al.* Outcome in acute heart failure: prognostic value of acute kidney injury and worsening renal function. *J Card Fail.* **21**, 382-90 (2015).
15. Sundararajan, V. *et al.* New ICD-10 version of the Charlson comorbidity index predicted in-hospital mortality. *J Clin Epidemiol.* **57**, 1288-94 (2004).
16. R Core Team (2017). R: A language and environment for statistical computing. [program], 2019. R Foundation for Statistical Computing, Vienna, Austria. URL <https://www.R-project.org/>.
17. Saint, S. *et al.* Are physicians aware of which of their patients have indwelling urinary catheters? *Am J Med.* **109**, 476-80 (2000).
18. Gokula, R. R., Hickner, J. A., Smith, M. A. Inappropriate use of urinary catheters in elderly patients at a midwestern community teaching hospital. *Am J Infect Control.* **32**, 196-9 (2004).
19. Centers for Disease Control and Prevention. Examples of Appropriate Indications for Indwelling Urethral Catheter Use. URL: <https://www.cdc.gov/infectioncontrol/guidelines/cauti/recommendations.html> (last access: 09.04.2020)
20. Physicians ACoE. Choosing Wisely, 2013. URL: <https://www.choosingwisely.org/societies/american-college-of-emergency-physicians/> (last access: 09.04.2020)
21. Générale SSdmi. Choosing Wisely, 2016. URL: <https://www.smartermedicine.ch/fr/liste-top-5/infektiologie.html#c15766> (last access: 09.04.2020)
22. Miller, P. E. *et al.* National Trends in Healthcare-Associated Infections for Five Common Cardiovascular Conditions. *Am J Cardiol.* **124**, 1140-48 (2019).

1 23. Saint, S. *et al.* Condom Catheters versus Indwelling Urethral Catheters in Men: A  
2  
3  
4 Prospective, Observational Study. *J Hosp Med.* **14**, E1-E4 (2019).  
5  
6  
7  
8  
9  
10  
11  
12  
13  
14  
15  
16  
17  
18  
19  
20  
21  
22  
23  
24  
25  
26  
27  
28  
29  
30  
31  
32  
33  
34  
35  
36  
37  
38  
39  
40  
41  
42  
43  
44  
45  
46  
47  
48  
49  
50  
51  
52  
53  
54  
55  
56  
57  
58  
59  
60

For peer review only

## ACKNOWLEDGEMENTS

We gratefully acknowledge Elise Dupuis for her help with the statistical analysis.

## FUNDING

The study received a grant from Geneva University Hospitals (grant: PRD 1-2017-I).

## AUTHORS STATEMENT

**G.J.:** planned the study (protocol), performed the analyses and wrote the manuscript.

**S.C.:** planned the study (protocol) and reviewed and approved the final manuscript.

**D.C.:** planned the study (protocol) and reviewed and approved the final manuscript.

**N.G.:** planned the study (protocol) and reviewed and approved the final manuscript.

**J.S.:** planned the study (protocol), performed the analyses, and reviewed and approved the final manuscript.

**M.A.:** collected the data and reviewed and approved the final manuscript.

**G.B.:** collected the data and reviewed and approved the final manuscript.

## CONFLICT OF INTEREST STATEMENT

The authors declare no competing interests.



## ABBREVIATIONS

AKI: acute kidney injury

CI: confidence interval

CPAP: continuous positive airway pressure HF: heart failure

HR: hazard ratio

HUG: Geneva University Hospitals

KDIGO: Kidney Disease: Improving Global Outcomes

LVEF: left ventricular ejection fraction

OR: odds ratio UC: urinary catheterisation

UTI: urinary tract infection

1  
2  
3  
4 **Figure 1:** Predicted excess weight for patients with (black line) and without (green line) urinary  
5 catheterisation (UC). Mean expected excess weights and their confidence intervals were  
6 calculated using an adjusted mixed-effects model assuming mean values for continuous  
7 predictors and a proportion of positive categorical predictors similar to the study sample. UC  
8 had no statistical effect on excess weight evolution over time ( $p$  for interaction = 0.55).  
9  
10  
11  
12  
13  
14  
15  
16  
17  
18  
19  
20

21 **Figure 2:** Time to reach clinical improvement for patients with urinary catheterisation (black  
22 line) and controls (green line): (A) time to reach target weight; (B) time to discontinuation of  
23 intravenous diuretics; (C) time to discontinuation of continuous positive airway pressure  
24 therapy; and (D) time to discontinuation of oxygen supply.  
25  
26  
27  
28  
29  
30  
31  
32  
33  
34  
35  
36

37 **Figure 3:** Time to reach unfavourable outcomes for patients with urinary catheterisation (black  
38 line) and controls (green line): (A) time to first urinary tract infection; (B) time to first all-cause  
39 hospital readmission; (C) time to first heart failure-related readmission; and (D) time to death.  
40  
41  
42  
43  
44  
45  
46  
47  
48  
49  
50  
51  
52  
53  
54  
55  
56  
57  
58  
59  
60

**Table 1:** Characteristics of participants with and without urinary catheterisation (UC). Only UC within 24 h of diuretic therapy initiation was considered. Values are numbers (percentage) unless otherwise stated.

| Characteristic                                                                                                                                                                                                                                                                                                     | Cohort<br>(N = 459) | With UC<br>(N = 113) | Without UC<br>N = 346) | P value  |
|--------------------------------------------------------------------------------------------------------------------------------------------------------------------------------------------------------------------------------------------------------------------------------------------------------------------|---------------------|----------------------|------------------------|----------|
| Age (y), median (IQR)                                                                                                                                                                                                                                                                                              | 81 (73–86)          | 83.5 (76–89)         | 80 (71–85)             | < 0.001  |
| Male                                                                                                                                                                                                                                                                                                               | 248 (55.2%)         | 52 (47.3%)           | 196 (57.8%)            | 0.053    |
| Admitted through ER                                                                                                                                                                                                                                                                                                | 398 (86.7%)         | 97 (85.8%)           | 301 (87.0%)            | 0.754    |
| Night-time admission (19h00–07h00)                                                                                                                                                                                                                                                                                 | 169 (36.8%)         | 37 (32.7%)           | 132 (38.1%)            | 0.301    |
| Current smoker                                                                                                                                                                                                                                                                                                     | 79 (18.0%)          | 18 (17.3%)           | 61 (18.1%)             | 0.844*   |
| High blood pressure                                                                                                                                                                                                                                                                                                | 331 (73.7%)         | 83 (73.7%)           | 248 (73.2%)            | 0.709    |
| Diabetes                                                                                                                                                                                                                                                                                                           | 135 (30.1%)         | 34 (30.9%)           | 101 (29.8%)            | 0.812    |
| Myocardial infarct                                                                                                                                                                                                                                                                                                 | 27 (6.1%)           | 6 (5.5%)             | 21 (6.3%)              | 0.762*   |
| Stroke                                                                                                                                                                                                                                                                                                             | 52 (11.8%)          | 18 (16.1%)           | 34 (10.2%)             | 0.076*   |
| Peripheral vascular disease                                                                                                                                                                                                                                                                                        | 76 (17.2%)          | 23 (21.1%)           | 53 (15.9%)             | 0.242*   |
| Dementia                                                                                                                                                                                                                                                                                                           | 30 (6.8%)           | 9 (8.3%)             | 21 (6.3%)              | 0.482*   |
| COPD                                                                                                                                                                                                                                                                                                               | 66 (14.7%)          | 16 (14.5%)           | 50 (14.7%)             | 0.958*   |
| Oncological disease                                                                                                                                                                                                                                                                                                | 32 (7.2%)           | 8 (7.3%)             | 24 (7.2%)              | 0.963*   |
| Liver disease                                                                                                                                                                                                                                                                                                      | 24 (5.4%)           | 7 (6.4%)             | 17 (5.1%)              | 0.598*   |
| CKD                                                                                                                                                                                                                                                                                                                |                     |                      |                        |          |
| II                                                                                                                                                                                                                                                                                                                 | 174 (38.7%)         | 39 (35.4%)           | 135 (39.2%)            | 0.380    |
| III                                                                                                                                                                                                                                                                                                                | 154 (34.4%)         | 40 (36.4%)           | 114 (33.6%)            |          |
| IV                                                                                                                                                                                                                                                                                                                 | 22 (4.9%)           | 6 (5.5%)             | 16 (4.7%)              |          |
| V                                                                                                                                                                                                                                                                                                                  | 2 (0.5%)            | 0                    | 2 (0.6%)               |          |
| Charlson comorbidity index, median (IQR)                                                                                                                                                                                                                                                                           | 3 (1–4)             | 3 (2–4)              | 3 (1–4)                | 0.115    |
| <b>Pre-admission medication</b>                                                                                                                                                                                                                                                                                    |                     |                      |                        |          |
| ACE/ARB                                                                                                                                                                                                                                                                                                            | 290 (64.6%)         | 65 (59.1%)           | 225 (66.4%)            | 0.165    |
| Beta-blocker                                                                                                                                                                                                                                                                                                       | 204 (45.4%)         | 49 (44.5%)           | 155 (45.7%)            | 0.829    |
| Aldosterone inhibitor                                                                                                                                                                                                                                                                                              | 62 (13.8%)          | 14 (12.7%)           | 48 (14.2%)             | 0.753*   |
| Diuretics                                                                                                                                                                                                                                                                                                          | 239 (52.1%)         | 66 (58.4%)           | 173 (50.0%)            | 0.120    |
| <b>Admission characteristics</b>                                                                                                                                                                                                                                                                                   |                     |                      |                        |          |
| Heart rate (beat/min), median (IQR)                                                                                                                                                                                                                                                                                | 81 (70–94)          | 82.5 (70–91)         | 80 (69.5–95)           | 0.785    |
| Mean blood pressure (mmHg), median (IQR)                                                                                                                                                                                                                                                                           | 90 (80–100)         | 88.3 (78.3–100)      | 90 (80.3–100)          | 0.162    |
| AKI                                                                                                                                                                                                                                                                                                                |                     |                      |                        |          |
| I                                                                                                                                                                                                                                                                                                                  | 143 (31.5%)         | 46 (41.8%)           | 97 (28.6%)             | 0.002*   |
| II                                                                                                                                                                                                                                                                                                                 | 24 (5.3%)           | 9 (8.2%)             | 15 (4.4%)              |          |
| III                                                                                                                                                                                                                                                                                                                | 5 (1.1%)            | 3 (2.7%)             | 2 (0.6%)               |          |
| Respiratory failure:                                                                                                                                                                                                                                                                                               | 371 (80.8%)         | 105 (92.9%)          | 266 (76.9%)            | < 0.001* |
| - Needs oxygen supply                                                                                                                                                                                                                                                                                              | 365 (79.5%)         | 104 (92.0%)          | 261 (75.4%)            |          |
| - CPAP                                                                                                                                                                                                                                                                                                             | 75 (16.3%)          | 27 (23.9%)           | 48 (13.9%)             |          |
| Volume overload                                                                                                                                                                                                                                                                                                    | 342 (74.5%)         | 86 (76.1%)           | 256 (74.0%)            | 0.654    |
| - Target weight (kg), median (IQR)                                                                                                                                                                                                                                                                                 | 69.2 (58.1–80.8)    | 70 (58–81.4)         | 68.7 (58.6–80.5)       |          |
| Intravenous therapy                                                                                                                                                                                                                                                                                                | 431 (93.9%)         | 108 (95.6%)          | 323 (93.4%)            | 0.391*   |
| Continuous intravenous diuretic therapy                                                                                                                                                                                                                                                                            | 42 (9.2%)           | 15 (13.4%)           | 27 (7.8%)              | 0.076*   |
| Initial diuretic doses (mg), median (IQR)                                                                                                                                                                                                                                                                          | 40 (30–80)          | 60 (40–90)           | 40 (20–60)             | < 0.001  |
| * Fischer test                                                                                                                                                                                                                                                                                                     |                     |                      |                        |          |
| ACE, angiotensin-converting-enzyme inhibitor; AKI, acute kidney injury; ARB, angiotensin receptor blockers; CKD, chronic kidney disease by CKD-EPI classification; COPD, chronic obstructive pulmonary disease; CPAP, continuous positive airway pressure therapy; ER, emergency room; UC: urinary catheterisation |                     |                      |                        |          |

**Table 2:** Clinical improvements and adverse outcomes with and without urinary catheterisation. Values are numbers unless otherwise stated.

| <b>Time to clinical improvement</b>                                            | <b>With UC</b> | <b>Without UC</b> | <b>HR</b>      | <b>Adjusted HR</b> |
|--------------------------------------------------------------------------------|----------------|-------------------|----------------|--------------------|
| Time to target weight (d), median (IQR)                                        | 6 (3–7)        | 6 (3–7)           | 1.1 (0.8–1.5)  | 1.0 (0.7–1.5)      |
| Time to switch/discontinuation of intravenous diuretics (d), median (IQR)      | 4 (2–8)        | 3 (1–6)           | 0.8 (0.7–1.0)  | 0.9 (0.7–1.2)      |
| Time to discontinuation of CPAP (d), median (IQR)                              | 4 (2–6)        | 4 (2–5)           | 1.2 (0.7–2.2)  | 1.1 (0.5–2.4)      |
| Time to discontinuation of oxygen supply (d), median (IQR)                     | 4 (2–8)        | 3 (1–7)           | 0.8 (0.6–1.0)  | 0.9 (0.7–1.2)      |
| <b>Time to adverse events</b>                                                  | <b>With UC</b> | <b>Without UC</b> | <b>HR</b>      | <b>Adjusted HR</b> |
| Urinary tract infection, n (%)                                                 | 37 (32.7%)     | 46 (13.3%)        | 2.9 (1.8–4.8)* | 2.5 (1.5–4.2)*     |
| One-year all-cause hospital readmission, n (%)                                 | 56 (50.9%)     | 193 (56.9%)       | 1.1 (0.8–1.4)  | 1.1 (0.8–1.4)      |
| One-year heart failure-related hospital readmission, n (%)                     | 28 (25.5%)     | 91 (26.8%)        | 1.1 (0.7–1.7)  | 1.1 (0.7–1.7)      |
| One-year mortality, n (%)                                                      | 51 (50.0%)     | 101 (33.4%)       | 1.7 (1.2–2.4)* | 1.4 (1.0–2.1)      |
| <b>Other secondary outcomes</b>                                                | <b>With UC</b> | <b>Without UC</b> | <b>OR</b>      | <b>Adjusted OR</b> |
| Initial treatment failure                                                      | 23 (26.7%)     | 78 (30.5%)        | 0.8 (0.5–1.4)  | 0.8 (0.4–1.4)      |
| Low blood pressure episode                                                     | 49 (43.7%)     | 154 (44.6%)       | 1.0 (0.6–1.5)  | 1.1 (0.7–1.7)      |
| - Need of saline perfusion                                                     | 24/49 (49.0)   | 67/154 (43.5)     |                |                    |
| Worsening of renal function                                                    |                |                   |                |                    |
| 0                                                                              | 82 (74.6%)     | 260 (76.7%)       | 1.1 (0.7–1.8)† | 1.1 (0.7–1.8)†     |
| 1                                                                              | 27 (24.6%)     | 73 (21.5%)        |                |                    |
| 2                                                                              | 1 (-)          | 6 (1.8%)          |                |                    |
| * <i>p</i> value < 0.05; † OR of changing to a worse category                  |                |                   |                |                    |
| CPAP, continuous positive airway pressure therapy; UC, urinary catheterisation |                |                   |                |                    |

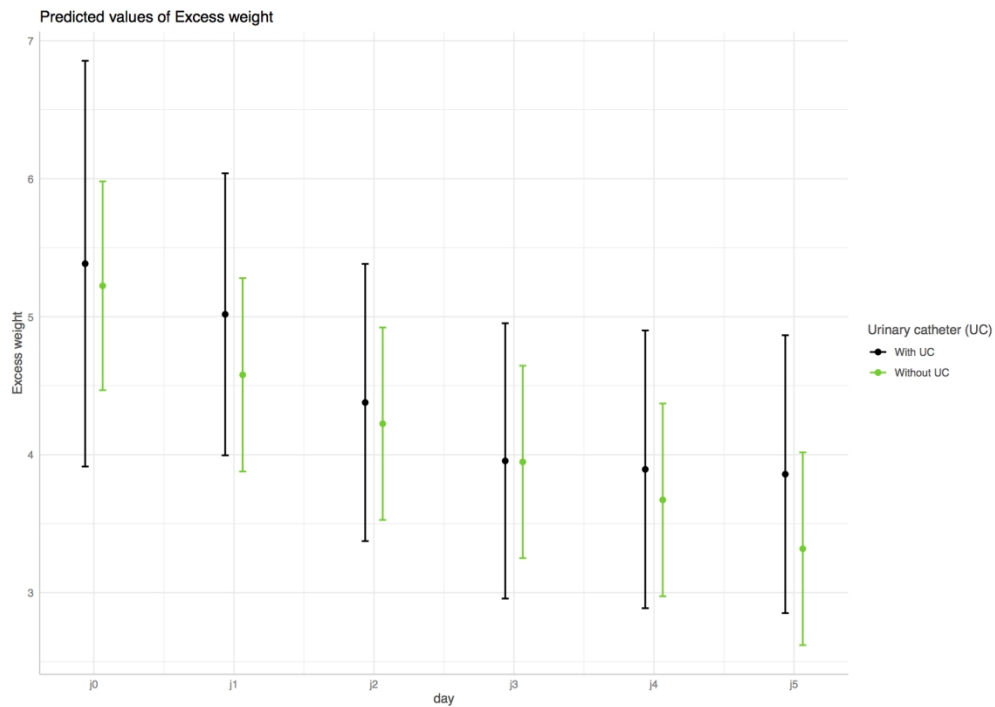

Predicted excess weight (kg) over time (days) for patients with (black line) and without (green line) urinary catheterisation (UC). Mean expected excess weights and their confidence intervals were calculated using an adjusted mixed-effects model assuming mean values for continuous predictors and a proportion of positive categorical predictors similar to the study sample. UC had no statistical effect on excess weight evolution over time ( $p$  for interaction = 0.55).

296x209mm (150 x 150 DPI)

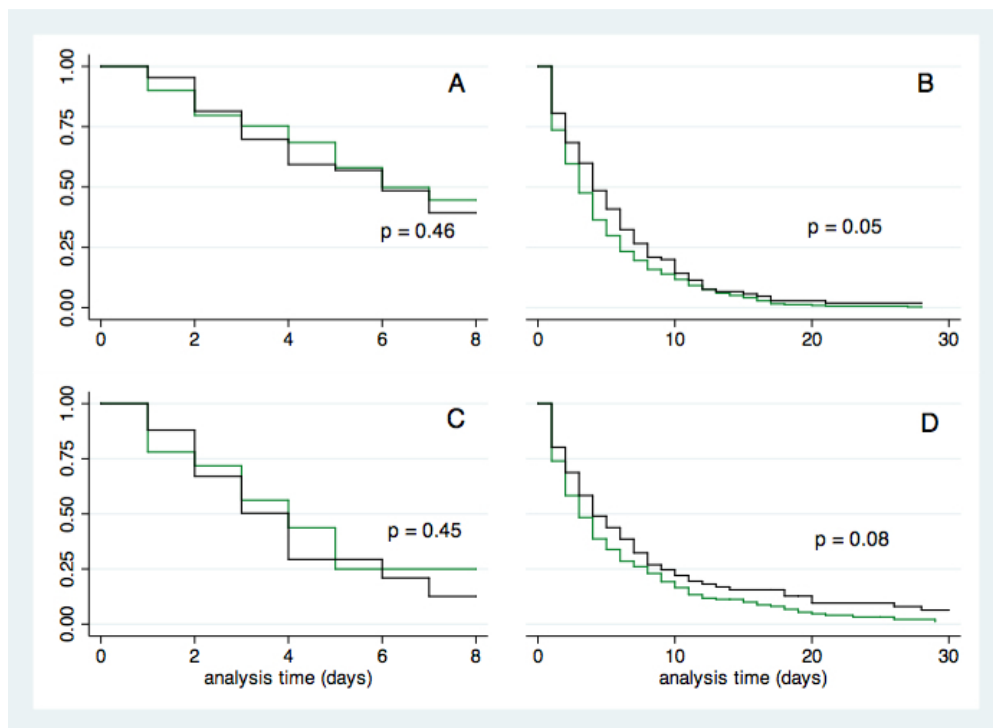

Time to reach clinical improvement for patients with urinary catheterisation (black line) and controls (green line): (A) time to reach target weight; (B) time to discontinuation of intravenous diuretics; (C) time to discontinuation of continuous positive airway pressure supply; and (D) time to discontinuation of oxygen supply.

244x178mm (72 x 72 DPI)

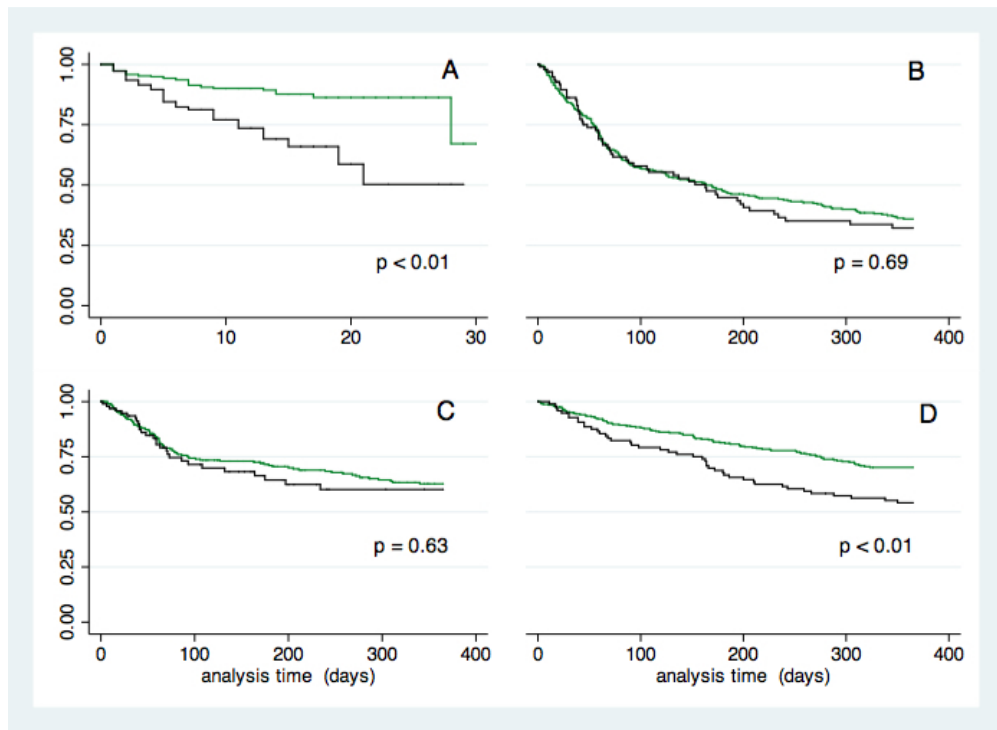

Time to reach unfavourable outcomes for patients with urinary catheterisation (black line) and controls (green line): (A) time to first urinary tract infection; (B) time to first all-cause hospital readmission; (C) time to first heart failure-related readmission; and (D) time to death.

244x178mm (72 x 72 DPI)

## STROBE Statement—checklist of items that should be included in reports of observational studies

|                              | Item No. | Recommendation                                                                                                                                                                                                                                                                                                                                                                                                                                                         | Page No. | Relevant text from manuscript |
|------------------------------|----------|------------------------------------------------------------------------------------------------------------------------------------------------------------------------------------------------------------------------------------------------------------------------------------------------------------------------------------------------------------------------------------------------------------------------------------------------------------------------|----------|-------------------------------|
| <b>Title and abstract</b>    | 1        | (a) Indicate the study's design with a commonly used term in the title or the abstract                                                                                                                                                                                                                                                                                                                                                                                 | 1, 3     |                               |
|                              |          | (b) Provide in the abstract an informative and balanced summary of what was done and what was found                                                                                                                                                                                                                                                                                                                                                                    | 3,4      |                               |
| <b>Introduction</b>          |          |                                                                                                                                                                                                                                                                                                                                                                                                                                                                        |          |                               |
| Background/rationale         | 2        | Explain the scientific background and rationale for the investigation being reported                                                                                                                                                                                                                                                                                                                                                                                   | 5        |                               |
| Objectives                   | 3        | State specific objectives, including any prespecified hypotheses                                                                                                                                                                                                                                                                                                                                                                                                       | 5-6      |                               |
| <b>Methods</b>               |          |                                                                                                                                                                                                                                                                                                                                                                                                                                                                        |          |                               |
| Study design                 | 4        | Present key elements of study design early in the paper                                                                                                                                                                                                                                                                                                                                                                                                                | 6        |                               |
| Setting                      | 5        | Describe the setting, locations, and relevant dates, including periods of recruitment, exposure, follow-up, and data collection                                                                                                                                                                                                                                                                                                                                        | 6-7      |                               |
| Participants                 | 6        | (a) <i>Cohort study</i> —Give the eligibility criteria, and the sources and methods of selection of participants. Describe methods of follow-up<br><i>Case-control study</i> —Give the eligibility criteria, and the sources and methods of case ascertainment and control selection. Give the rationale for the choice of cases and controls<br><i>Cross-sectional study</i> —Give the eligibility criteria, and the sources and methods of selection of participants | 6-7      |                               |
|                              |          | (b) <i>Cohort study</i> —For matched studies, give matching criteria and number of exposed and unexposed<br><i>Case-control study</i> —For matched studies, give matching criteria and the number of controls per case                                                                                                                                                                                                                                                 | 10-11    |                               |
| Variables                    | 7        | Clearly define all outcomes, exposures, predictors, potential confounders, and effect modifiers. Give diagnostic criteria, if applicable                                                                                                                                                                                                                                                                                                                               | 9        |                               |
| Data sources/<br>measurement | 8*       | For each variable of interest, give sources of data and details of methods of assessment (measurement). Describe comparability of assessment methods if there is more than one group                                                                                                                                                                                                                                                                                   | 9        |                               |
| Bias                         | 9        | Describe any efforts to address potential sources of bias                                                                                                                                                                                                                                                                                                                                                                                                              | 10       |                               |
| Study size                   | 10       | Explain how the study size was arrived at                                                                                                                                                                                                                                                                                                                                                                                                                              | NA       |                               |

Continued on next page



|                        |     |                                                                                                                                                                                                                    |                  |
|------------------------|-----|--------------------------------------------------------------------------------------------------------------------------------------------------------------------------------------------------------------------|------------------|
| Quantitative variables | 11  | Explain how quantitative variables were handled in the analyses. If applicable, describe which groupings were chosen and why                                                                                       | 10               |
| Statistical methods    | 12  | (a) Describe all statistical methods, including those used to control for confounding                                                                                                                              | 9-11             |
|                        |     | (b) Describe any methods used to examine subgroups and interactions                                                                                                                                                | NA               |
|                        |     | (c) Explain how missing data were addressed                                                                                                                                                                        | 6                |
|                        |     | (d) <i>Cohort study</i> —If applicable, explain how loss to follow-up was addressed                                                                                                                                | 10-11            |
|                        |     | <i>Case-control study</i> —If applicable, explain how matching of cases and controls was addressed<br><i>Cross-sectional study</i> —If applicable, describe analytical methods taking account of sampling strategy |                  |
|                        |     | (e) Describe any sensitivity analyses                                                                                                                                                                              | 10               |
| <b>Results</b>         |     |                                                                                                                                                                                                                    |                  |
| Participants           | 13* | (a) Report numbers of individuals at each stage of study—eg numbers potentially eligible, examined for eligibility, confirmed eligible, included in the study, completing follow-up, and analysed                  | 12-14, table 1-2 |
|                        |     | (b) Give reasons for non-participation at each stage                                                                                                                                                               |                  |
|                        |     | (c) Consider use of a flow diagram                                                                                                                                                                                 |                  |
| Descriptive data       | 14* | (a) Give characteristics of study participants (eg demographic, clinical, social) and information on exposures and potential confounders                                                                           | Table 1          |
|                        |     | (b) Indicate number of participants with missing data for each variable of interest                                                                                                                                | 12               |
|                        |     | (c) <i>Cohort study</i> —Summarise follow-up time (eg, average and total amount)                                                                                                                                   | Figure2-3        |
| Outcome data           | 15* | <i>Cohort study</i> —Report numbers of outcome events or summary measures over time                                                                                                                                | Figure2-3        |
|                        |     | <i>Case-control study</i> —Report numbers in each exposure category, or summary measures of exposure                                                                                                               | NA               |
|                        |     | <i>Cross-sectional study</i> —Report numbers of outcome events or summary measures                                                                                                                                 |                  |
| Main results           | 16  | (a) Give unadjusted estimates and, if applicable, confounder-adjusted estimates and their precision (eg, 95% confidence interval). Make clear which confounders were adjusted for and why they were included       | Table2           |
|                        |     | (b) Report category boundaries when continuous variables were categorized                                                                                                                                          |                  |
|                        |     | (c) If relevant, consider translating estimates of relative risk into absolute risk for a meaningful time period                                                                                                   |                  |

Continued on next page

|                          |    |                                                                                                                                                                            |       |
|--------------------------|----|----------------------------------------------------------------------------------------------------------------------------------------------------------------------------|-------|
| Other analyses           | 17 | Report other analyses done—eg analyses of subgroups and interactions, and sensitivity analyses                                                                             | 12    |
| <b>Discussion</b>        |    |                                                                                                                                                                            |       |
| Key results              | 18 | Summarise key results with reference to study objectives                                                                                                                   | 14    |
| Limitations              | 19 | Discuss limitations of the study, taking into account sources of potential bias or imprecision. Discuss both direction and magnitude of any potential bias                 | 16    |
| Interpretation           | 20 | Give a cautious overall interpretation of results considering objectives, limitations, multiplicity of analyses, results from similar studies, and other relevant evidence | 16    |
| Generalisability         | 21 | Discuss the generalisability (external validity) of the study results                                                                                                      | 16    |
| <b>Other information</b> |    |                                                                                                                                                                            |       |
| Funding                  | 22 | Give the source of funding and the role of the funders for the present study and, if applicable, for the original study on which the present article is based              | 16-17 |

\*Give information separately for cases and controls in case-control studies and, if applicable, for exposed and unexposed groups in cohort and cross-sectional studies.

**Note:** An Explanation and Elaboration article discusses each checklist item and gives methodological background and published examples of transparent reporting. The STROBE checklist is best used in conjunction with this article (freely available on the Web sites of PLoS Medicine at <http://www.plosmedicine.org/>, Annals of Internal Medicine at <http://www.annals.org/>, and Epidemiology at <http://www.epidem.com/>). Information on the STROBE Initiative is available at [www.strobe-statement.org](http://www.strobe-statement.org).

# BMJ Open

## Risks and benefits of urinary catheterisation during inpatient diuretic therapy for acute heart failure: A retrospective, non-inferiority, cohort study

|                                 |                                                                                                                                                                                                                                                                                                                                                                                                                                                                                                                                                                                                                                                                                          |
|---------------------------------|------------------------------------------------------------------------------------------------------------------------------------------------------------------------------------------------------------------------------------------------------------------------------------------------------------------------------------------------------------------------------------------------------------------------------------------------------------------------------------------------------------------------------------------------------------------------------------------------------------------------------------------------------------------------------------------|
| Journal:                        | <i>BMJ Open</i>                                                                                                                                                                                                                                                                                                                                                                                                                                                                                                                                                                                                                                                                          |
| Manuscript ID                   | bmjopen-2021-053632.R1                                                                                                                                                                                                                                                                                                                                                                                                                                                                                                                                                                                                                                                                   |
| Article Type:                   | Original research                                                                                                                                                                                                                                                                                                                                                                                                                                                                                                                                                                                                                                                                        |
| Date Submitted by the Author:   | 02-Dec-2021                                                                                                                                                                                                                                                                                                                                                                                                                                                                                                                                                                                                                                                                              |
| Complete List of Authors:       | John, Gregor; Hôpitaux Universitaires Genève, Department of Internal Medicine; Université de Genève, Department of Medicine<br>Arcens, Marc; Hôpitaux Universitaires Genève, Department of Medicine<br>Berra, Gregory; Hôpitaux Universitaires Genève, Department of Medicine<br>Garin, Nicolas; Hôpitaux Universitaires Genève, Department of Medicine; Université de Genève<br>Carballo, David ; Université de Genève; Hôpitaux Universitaires Genève, Department of Medicine<br>Carballo, Sebastian; Hôpitaux Universitaires Genève, Department of Medicine; Université de Genève<br>Stirnemann, Jerome; Hôpitaux Universitaires Genève, Department of Medicine; Université de Genève |
| <b>Primary Subject Heading</b>: | Cardiovascular medicine                                                                                                                                                                                                                                                                                                                                                                                                                                                                                                                                                                                                                                                                  |
| Secondary Subject Heading:      | Medical management, Infectious diseases, Geriatric medicine, Evidence based practice                                                                                                                                                                                                                                                                                                                                                                                                                                                                                                                                                                                                     |
| Keywords:                       | Heart failure < CARDIOLOGY, Urinary tract infections < UROLOGY, Health & safety < HEALTH SERVICES ADMINISTRATION & MANAGEMENT                                                                                                                                                                                                                                                                                                                                                                                                                                                                                                                                                            |
|                                 |                                                                                                                                                                                                                                                                                                                                                                                                                                                                                                                                                                                                                                                                                          |

SCHOLARONE™  
Manuscripts



I, the Submitting Author has the right to grant and does grant on behalf of all authors of the Work (as defined in the below author licence), an exclusive licence and/or a non-exclusive licence for contributions from authors who are: i) UK Crown employees; ii) where BMJ has agreed a CC-BY licence shall apply, and/or iii) in accordance with the terms applicable for US Federal Government officers or employees acting as part of their official duties; on a worldwide, perpetual, irrevocable, royalty-free basis to BMJ Publishing Group Ltd ("BMJ") its licensees and where the relevant Journal is co-owned by BMJ to the co-owners of the Journal, to publish the Work in this journal and any other BMJ products and to exploit all rights, as set out in our [licence](#).

The Submitting Author accepts and understands that any supply made under these terms is made by BMJ to the Submitting Author unless you are acting as an employee on behalf of your employer or a postgraduate student of an affiliated institution which is paying any applicable article publishing charge ("APC") for Open Access articles. Where the Submitting Author wishes to make the Work available on an Open Access basis (and intends to pay the relevant APC), the terms of reuse of such Open Access shall be governed by a Creative Commons licence – details of these licences and which [Creative Commons](#) licence will apply to this Work are set out in our licence referred to above.

Other than as permitted in any relevant BMJ Author's Self Archiving Policies, I confirm this Work has not been accepted for publication elsewhere, is not being considered for publication elsewhere and does not duplicate material already published. I confirm all authors consent to publication of this Work and authorise the granting of this licence.

1 **Title:** Risks and benefits of urinary catheterisation during inpatient  
2  
3  
4 diuretic therapy for acute heart failure: A retrospective, non-inferiority,  
5  
6 cohort study  
7  
8  
9

10 **Running headline:** urinary catheterisation in acute heart failure.  
11  
12  
13

14 Gregor John<sup>1,2,3\*</sup>, Marc Arcens<sup>2</sup>, Gregory Berra<sup>2</sup>, Nicolas Garin<sup>2,3</sup>, David Carballo<sup>3,4</sup>,  
15  
16 Sebastian Carballo<sup>2,3</sup>, Jérôme Stirnemann<sup>2,3</sup>.  
17  
18  
19  
20

21 1. Department of Internal Medicine, Neuchâtel Hospital Network, Rue de la Maladière  
22  
23 45, CH-2000 Neuchâtel, Switzerland  
24  
25

26 2. Department of Medicine, Geneva University Hospitals (HUG), Gabrielle-Perret-  
27  
28 Gentil 4, CH-1205 Geneva, Switzerland; Fax: 0041 32 967 27 29, Phone: 0041 79  
29  
30 559 59 29; gregor.john@h-ne.ch (may be published).  
31  
32

33 3. Geneva university, Michel-Servet 1, 1211 Genève 4, Switzerland.  
34

35 4. Cardiology Service, Department of Medicine, Geneva University Hospitals (HUG),  
36  
37 Gabrielle-Perret-Gentil 4, CH-1205 Geneva, david.carballo@hcuge.ch  
38  
39  
40  
41

42 **\*Gregor John<sup>1,2,3\*</sup>**, PD, MD (correspondence and requests for reprints); Department  
43  
44 of Internal Medicine, Neuchâtel Hospital Network, Rue de la Maladière 45, CH-2000  
45  
46 Neuchâtel, Switzerland. Fax: 0041 32 967 27 29, Phone: 0041 79 559 59 29;  
47  
48 gregor.john@h-ne.ch (may be published).  
49  
50  
51  
52

53 **Number of References:** 23, **Tables:** 2, **Figures:** 3, and **Appendix:** 0  
54  
55

56 **Word counts:** Abstract: 295; Text: 3066  
57

58 **Keywords:** Heart-failure, diuretics, urinary catheter, non-inferiority study, hospital  
59 readmission, mortality  
60

## ABSTRACT:

**Objectives:** Patients with acute congestive heart failure (HF) regularly undergo urinary catheterisation (UC) at hospital admission. Little evidence exists on the real benefit of using UC in patients treated by diuretics for HF. We aimed at exploring risks and clinical benefits of UC during inpatient diuretic therapy for acute congestive HF.

**Design:** retrospective, non-inferiority study.

**Setting:** Geneva University Hospitals' (HUG) Department of Medicine, a tertiary centre.

**Participants:** In a cohort of HF, patients catheterised within 24h of diuretic therapy (n=113) were compared with non-catheterised patients (n=346).

**Primary and secondary outcome measures:** The primary endpoint was the forty-eight hours weight loss after starting diuretic therapy. Secondary endpoints were the time needed to reach target weight, discontinuation of intravenous diuretics, and resolution of respiratory failure. Safety outcomes included the time to a first urinary tract infection UTI, first hospital readmission and death.

**Results:** Forty-eight hours weight loss was not statistically different between groups and the adjusted difference was below the non-inferiority boundary of 1kg (0.43 kg (95% CI: -0.03–0.88) in favour of UC,  $p < 0.01$  for non-inferiority). UC was not associated with time to reaching target weight (adjusted HR 1.0; 95%CI: 0.7–1.5), discontinuation of intravenous diuretics (aHR 0.9; 95%CI: 0.7–1.2), or resolution of respiratory failure (aHR 1.1; 95%CI: 0.5–2.4). UC increased the risk of urinary tract infection (aHR 2.5; 95%CI: 1.5–4.2). UC was not associated with hospital readmission (aHR 1.1, 95%CI: 0.8–1.4) or one-year mortality (aHR 1.4; 95%CI: 1.0–2.1).

1 **Conclusion:** In this retrospective study, with no obvious hourly diuresis-based diuretic  
2 adjustment strategy, UC insertion within 24h of initiating diuretic treatment had no  
3 impact on clinical improvement but increased risk of a urinary infection. This evidence,  
4 therefore, argues against a systematic use of UC during a diuretic therapy for HF.  
5  
6  
7  
8  
9

## 10 11 12 13 14 **‘STRENGTHS AND LIMITATIONS OF THIS STUDY’**

- 15  
16  
17  
18  
19  
20  
21  
22  
23  
24  
25  
26  
27  
28  
29  
30  
31  
32  
33  
34  
35  
36  
37  
38  
39  
40  
41  
42  
43  
44  
45  
46  
47  
48  
49  
50  
51  
52  
53  
54  
55  
56  
57  
58  
59  
60
- The present study is the first to give an insight into the hypothetical clinically relevant benefits of UC in the context of HF.
  - The preceded the advent of sacubitril or SGLT2 inhibitors therapy. Nevertheless, in 2021, updated ESC guidelines did not evolve regarding diuretics or the relevance of UC insertion for the management of acute decompensate HF. .
  - The study’s retrospective, observational approach only allowed us to hypothesise that urinary catheters were placed for HF management or to facilitate diuresis.
  - Since patients are usually not weighed in emergency rooms, we focused on the weight change from days 1 to day 3. Thus, UC’s impact during the first 24 h of diuretic therapy was not assessed.
  - A randomised prospective design, with protocols to guide rapid diuretic adaptation, would be better able to explore the UC’s real potential among HF patients. However, considering current evidence and risks, such a study may never occur.

## INTRODUCTION:

Heart failure (HF) is a major, growing, worldwide public health concern, affecting 2% of the developed world's population.[<sup>1</sup>] HF results in 1.7 million consultations and over 1 million hospitalisations yearly in the USA.[<sup>2</sup>] Since acute HF is the leading cause of hospitalisations in patients  $\geq 65$  years old, current demography will increase hospitalisation rates and health care costs.[<sup>1, 2</sup>]

Diuretics are the mainstay treatments for volume overload.[<sup>3, 4</sup>] Randomised studies of acute congestive HF have failed to associate either low or high initial doses of diuretics, or different modes of administration (continuous vs intermittent intravenous), with clinically significant differences in outcome.[<sup>5</sup>] Nevertheless, overly aggressive or insufficient treatments can result in acute kidney injury, electrolytic imbalance, low blood pressure, prolonged hospital length of stay (LOS) or early hospital readmission.[<sup>5, 6</sup>] Assessing adequate response to diuretics, e.g. measuring diuresis, is therefore important and enables rapid treatment adjustment. This may be as or even more useful than how diuretics are initially administered.

Between one quarter [<sup>7</sup>] and one half of patients hospitalised for HF undergoes indwelling urinary catheter placement.[<sup>8</sup>] Indications for UC in this population include managing hypervolemia [<sup>8, 9</sup>] or improving comfort during diuretic treatment.[<sup>10</sup>] By maximising the elimination of liquids while avoiding excessive losses, UC can have a positive impact on hospital LOS, readmission rates and even death. Although the benefits of UC remain uncertain, the risks of increased infectious and non-infectious complications are well known.[<sup>8, 11, 12</sup>] A recent retrospective study of catheterised HF



1 patients showed no impact on LOS and an increased risk of infection.<sup>[8]</sup> Little  
2  
3 evidence exists on UC's impact on clinically relevant improvements such as weight  
4  
5 loss, time to improvement of respiratory failure or time to discontinuation of  
6  
7 intravenous therapy. The present study aimed to determine the risks and clinical  
8  
9 benefits of UC among patients hospitalised for congestive HF.  
10  
11  
12  
13  
14  
15  
16

## 17 **MATERIALS AND METHODS**

21 We conducted a retrospective, non-inferiority, cohort study using a pre-existing cohort  
22  
23 of patients admitted to Geneva University Hospitals' (HUG) Department of Medicine  
24  
25 for acute HF.<sup>[13, 14]</sup> Patients were followed for one year or until death. Data on weight,  
26  
27 in-hospital diuretic use, UC and predefined outcomes were obtained from paper  
28  
29 medical charts, electronic medical records, laboratory databases and Switzerland's  
30  
31 national deaths registry. The institutional review board approved the study and the  
32  
33 need for informed consent to collect retrospectively information, was waived by the  
34  
35 ethical committee (Comission cantonale d'éthique de la recherche (CCER)). Reporting  
36  
37 and analyses were performed according to the Strengthening the Reporting of  
38  
39 Observational Studies in Epidemiology (STROBE) statement.  
40  
41  
42  
43  
44  
45  
46  
47

### 48 **STUDY POPULATION**

51 All patients  $\geq 18$  years old requiring hospital admission for a primary symptom of  
52  
53 dyspnoea and a diagnosis of acute decompensated HF between 01.01.2006 and  
54  
55 01.01.2010 were eligible.<sup>[13, 14]</sup> Acute decompensated HF was diagnosed from  
56  
57 patients' clinical presentation, risk factors and treatment responsiveness or was  
58  
59  
60

1 supported by structural or functional echocardiographic anomalies. Patients with final  
2 diagnosis other than HF that explained their dyspnoea, with low NT-proBNP level  
3 (<300ng/l), who were admitted to the intensive care unit, whose paper medical charts  
4 for the index admission were available or who did not receive diuretics during their first  
5 seven days of hospitalisation were excluded. We compared patients who underwent  
6 UC insertion within 24 h of diuretic therapy initiation with those not catheterised.  
7  
8  
9  
10  
11  
12  
13  
14  
15  
16  
17  
18

## 19 **OUTCOMES**

20  
21  
22 The primary endpoint was the 48 h weight loss after starting diuretic therapy.  
23 Secondary endpoints were persistent excess weight at 72 h and at one week, the time  
24 needed to reach clinical improvement (reaching target weight (+/- 0.5 kg),  
25 discontinuation of intravenous diuretics, oxygen supply and continuous positive airway  
26 pressure (CPAP)), and hospital LOS.  
27  
28  
29  
30  
31  
32  
33  
34  
35  
36

37 Safety outcomes included the proportion of patients with a urinary tract infection (UTI),  
38 initial diuretic treatment failure, worsening kidney function and episodes of low blood  
39 pressure, and time to a first UTI, first hospital readmission and death. Initial treatment  
40 failure was defined as a need for increased doses of diuretics, or a switch from oral to  
41 intravenous diuretic therapy or from a bolus to a continuous intravenous diuretic  
42 therapy two days or more after the initiation of diuretics. Diuretic dose increases before  
43 that point were considered to be usual treatment adjustments.  
44  
45  
46  
47  
48  
49  
50  
51  
52  
53  
54  
55  
56

## 57 **DATA COLLECTION**

1 Data extracted from medical charts included pre-admission diuretic use, micturition  
2 volumes during diuretic therapy, weight at discharge and, for the first seven days, daily  
3 information on the UC, weight, diuretics administration, clinical parameters, oxygen  
4 supply and use of CPAP therapy.  
5  
6  
7  
8  
9

10  
11  
12  
13  
14 Volume overload (hypervolaemia) was defined as excess weight at diuretic therapy.  
15 We calculated excess weight by subtracting target weight from other weights  
16 measured during hospitalisation. Target weight was defined as the patient's weight at  
17 discharge or, when unavailable, the lowest weight during hospitalisation that did not  
18 result in increased creatinaemia or low blood pressure. Since patients are not always  
19 weighed on admission day, 48 h weight loss was calculated between days 1 and 3  
20 after starting diuretic therapy (day 0). When weight on day 1 or on day 3, was missing,  
21 we took double the mean daily weight loss calculated between day 0 to day 4.  
22  
23  
24  
25  
26  
27  
28  
29  
30  
31  
32  
33  
34  
35  
36

37 Respiratory failure was defined as the need for oxygen supply or CPAP. We noted  
38 episodes of low blood pressure (systolic pressure < 100 mmHg) and the need for  
39 saline perfusion. Daily doses of torasemide were multiplied by two and doses of oral  
40 furosemide were divided by two to convert daily diuretics use into an equivalent  
41 intravenous furosemide dosage.<sup>[15]</sup>  
42  
43  
44  
45  
46  
47  
48  
49  
50  
51  
52

53 We obtained patients' habitual kidney function from their general practitioner.<sup>[14]</sup>  
54 Kidney function at hospital admission and during the first week was extracted from the  
55 laboratory database. We defined acute kidney injury (AKI) as any kidney function at  
56 admission lower than its usual value, and worsening kidney function (WKF) as kidney  
57  
58  
59  
60

1 function that decreased during hospitalisation relative to admission values.<sup>[14]</sup> AKI and  
2  
3 WKF were scored according to the KDIGO classification. An absolute increase in the  
4  
5 creatinine value of 26.4mmol/L, or a 1.5 to <2-fold increase over the baseline creatinine  
6  
7 value was defined stage I. A  $\geq 2$  to <3-fold increase was defined as stage II and a  $\geq 3$ -  
8  
9 fold increase or use of dialysis was determined as stage III.  
10  
11

12  
13 Comorbidity burdens were summarised using Charlson index, calculated using the  
14  
15 CIM-10 codes from electronic medical charts.<sup>[16]</sup> HF types were stratified into  
16  
17 intermediate or reduced left ventricular ejection fraction (LVEF < 49%), preserved  
18  
19 LVEF (LVEF > 50%) and unknown LVEF.  
20  
21  
22

23  
24  
25  
26  
27 We extracted urinary and blood culture information from the microbiology laboratory  
28  
29 database for each febrile episode during hospitalisation. A diagnosis of UTI was  
30  
31 defined as bacterial growth of  $10E^3$  colony-forming units in a urine sample plus the  
32  
33 corresponding symptoms of a UTI.  
34  
35  
36  
37

38  
39 Information on death was obtained from Switzerland's national deaths registry and  
40  
41 Geneva University Hospitals' (the only public hospital in the canton) electronic  
42  
43 databases. We reviewed charts for hospital LOS, place of discharge (home vs  
44  
45 rehabilitation centre or care home), and all-cause and HF-related hospital  
46  
47 readmissions within one year.  
48  
49  
50

## 51 **PATIENT AND PUBLIC INVOLVEMENT**

52  
53  
54 Patients were not involved in the study design or conduct.  
55  
56

## 57 **STATISTICS**

1 For our analyses, timings (day 0) were set from the first day of diuretic use, which could  
2 differ from the hospital admission day.  
3  
4

### 5 6 *Primary analysis and weight evolution* 7

8  
9  
10 Weight loss analyses during diuretic treatment were restricted to patients with volume  
11 overload. The primary analysis used a linear regression model, where the 48 h weight  
12 loss was the dependent variable and UC was the independent variable. The model  
13 was adjusted for age (continuous), sex (binary), Charlson index score (continuous),  
14 pre-admission diuretic dose (continuous), HF type (categorical), admission heart rate  
15 and blood pressure (continuous), respiratory failure (binary), weight excess at diuretic  
16 therapy (continuous), first diuretic dose (continuous), use of continuous intravenous  
17 diuretics (binary), AKI (categorical) and admission through the emergency room  
18 (binary). Adjustment factors were chosen based on clinical expertise. To reach non-  
19 inferiority, the upper confidence interval of a between-group difference had to be less  
20 than 1 kg (in favour of UC). The 1 kg boundary was arbitrarily chosen as a clinically  
21 relevant threshold. Unilateral T-test served to test non-inferiority.  
22  
23  
24  
25  
26  
27  
28  
29  
30  
31  
32  
33  
34  
35  
36  
37

38 We performed three sensitivity analyses for the main outcome. Firstly, multiple  
39 imputation method was used to replace missing values. Missing data, which were all  
40 5% or less, were inspected to ensure that the missing at random assumption was  
41 reasonable. Imputation involved all baseline responders and utilised the variables in  
42 the adjusted models. Missing data were imputed using chained equations. Twenty  
43 imputed datasets were generated and parameter estimates were combined using  
44 Rubin's rules. The second sensitivity analysis excluded patients with urinary retention.  
45  
46  
47  
48  
49  
50  
51  
52  
53  
54  
55  
56  
57  
58  
59  
60  
The third matched catheterised patients 1:1 to non-catheterised patients according to  
sex and the closest value (< 10%) of a propensity score. The score included all the

1 variables mentioned above except sex. A paired t-test was used to test mean  
2  
3 differences.  
4  
5  
6  
7  
8  
9

10 We used linear regression, adjusted for confounders, to explore associations between  
11 UC and persistent weight excess at 72 h and one week. We also tested the interaction  
12 between UC and time in a mixed-effects model adjusted for the factors mentioned  
13 above. A random intercept for each patient accounted for repeated measures across  
14 days. The mean expected excess weights of patients with and without UC was  
15 calculated assuming mean values for continuous predictors and a proportion of  
16 positive categorical predictors similar to the study sample.  
17  
18  
19  
20  
21  
22  
23  
24  
25  
26  
27  
28  
29

### 30 *Clinical improvements, safety outcomes and other analyses*

31  
32

33 The unadjusted impact of UC on time-dependent outcomes was analysed using  
34 Kaplan–Meier survival analysis and an unweighted, two-sided, log-rank test to  
35 compare groups. Analysis of target weight was restricted to patients with volume  
36 overload. Analyses of intravenous diuretics, oxygen supply and CPAP were restricted  
37 to patients receiving those therapies. Multivariate Cox models were adjusted for age,  
38 sex and Charlson comorbidity index score. For target weight and the time needed to  
39 discontinue intravenous diuretics, Cox models were further adjusted for all the  
40 confounding factors in the primary analysis. The proportional hazards assumption was  
41 verified using Schoenfeld residuals and a visual inspection of the log-minus-log plots.  
42  
43  
44  
45  
46  
47  
48  
49  
50  
51  
52  
53  
54  
55

56 The association between UC and LOS was tested using a linear regression model  
57 adjusted for confounding factors and in which LOS was log-transformed to correct for  
58  
59  
60

1 skewed data. Logistic regression was used to adjust binary outcomes for  
2  
3 confounders. Comparisons of characteristics between groups were performed using  
4  
5 the chi-squared test or Fisher's exact test, where appropriate, for categorical  
6  
7 variables. The Mann–Whitney test was used for continuous variables as these were  
8  
9 not normally distributed. Except for the primary outcomes, all analyses were two-  
10  
11 sided, with a significance level set at 5%. All analyses were performed using STATA,  
12  
13 version 12.0, and R statistical software, Version 4.0.0.[17]  
14  
15  
16  
17  
18  
19  
20  
21

## 22 RESULTS

23  
24  
25  
26 Of 640 potential participants in the HF register, 174 had no available paper medical  
27  
28 chart and 7 had had no diuretic therapy within the first 7 days, leaving a cohort of 459  
29  
30 patients of whom 113 underwent UC within the first 24 h (24.6%). Only four of these  
31  
32 patients had documented urinary retention. Catheterised patients were older, more  
33  
34 often women, more frequently experienced respiratory failure or AKI, and received  
35  
36 higher initial diuretic doses (**Table 1**). Urinary catheters were placed for a median of 4  
37  
38 days (IQR: 2–8). Diuresis was recorded more often among patients with UC (58.0%)  
39  
40 than patients without (41.2%,  $p < 0.01$ ).  
41  
42  
43  
44  
45  
46  
47  
48

### 49 EXCESS WEIGHT UNDER DIURETIC THERAPY

50  
51  
52 At diuretic therapy initiation, 342 patients carried excess weight and were included in  
53  
54 the primary analysis. In adjusted linear regressions, being catheterised was not  
55  
56 associated with significantly greater 48 h weight loss than not being catheterised  
57  
58 (0.43 Kg in favour of UC (95% CI: -0.03–0.88)). The upper confidence interval of  
59  
60

1 between-group difference was below the non-inferiority boundary of 1 kg ( $p < 0.01$  for  
2 non-inferiority).  
3  
4

5  
6 In sensitivity analysis, the results were in line with the primary analysis. The difference  
7 in 48 h weight loss, after multiple imputation for missing values, was 0.33 kg (95% CI:  
8 -0.1–0.76;  $p < 0.01$  for non-inferiority). Excluding patients with urinary retention ( $n = 4$ )  
9 did not change the results (data not shown). In the last sensitivity analysis, 64 patients  
10 with UC were matched with 64 patients without one (none had urinary retention). The  
11 difference in weight loss was 0.29 kg (95% CI: -0.3–0.88;  $p < 0.01$  for non-inferiority).  
12  
13  
14  
15  
16  
17  
18  
19  
20  
21  
22  
23  
24

25 Patients with UC did not have a statistically lower persistent excess weight at 72 h: the  
26 difference was 0.27 kg (95% CI: -0.52–1.1;  $p = 0.50$ ) in unadjusted and 0.24 kg  
27 (95% CI: -0.17–0.64;  $p < 0.001$  for non-inferiority) in adjusted linear regression. At one  
28 week, the excess weight difference between patients with and without UC was -0.09 kg  
29 (95% CI: -1.0–0.8;  $p = 0.84$ ) in unadjusted and -0.14 kg (95% CI: -0.89–0.60;  $p = 0.01$   
30 for non-inferiority) in adjusted linear regression. Similarly, there was no statistically  
31 significant interaction between UC and daily excess weight changes in the mixed-  
32 effects model ( $p = 0.55$ ; **Figure 1**).  
33  
34  
35  
36  
37  
38  
39  
40  
41  
42  
43  
44  
45  
46  
47

#### 48 **CLINICAL IMPROVEMENT**

49  
50 Time to reach target weight and time needed to discontinue CPAP were not statistically  
51 different between patients with and without UC in both unadjusted and adjusted  
52 analysis (**Figure 2, Table 2**). UC tended to be associated with a longer time to  
53 discontinuation of an intravenous diuretic or discontinuation of oxygen supply (**Figure**  
54 **2**), but the associations disappeared after adjustment for confounders (**Table 2**).  
55  
56  
57  
58  
59  
60



1  
2  
3  
4 The median hospital LOS was identical for patients with and without UC (12 days, IQR:  
5 9–18). However, fewer UC patients were discharged directly home from hospital  
6  
7 (57.3% vs 73.7%; adjusted OR 0.6 (95% CI: 0.3–0.9;  $p < 0.01$ )).  
8  
9  
10  
11  
12  
13  
14

## 15 SAFETY OUTCOMES

16  
17  
18 The proportions of initial treatment failures, low blood pressure episodes and patients  
19 with worsening kidney function were not statistically different between groups (**Table**  
20  
21  
22  
23  
24  
25  
26  
27  
28  
29  
30  
31  
32  
33  
34  
35  
36  
37  
38  
39  
40  
41  
42  
43  
44  
45  
46  
47  
48  
49  
50  
51  
52  
53  
54  
55  
56  
57  
58  
59  
60

All-cause and HF-related readmissions were not statistically different between patients with and without UC (**Table 2** and **Figure 3**). Half the patients with UC and one third without UC were dead at one year. The difference was not statistically significant after adjustment (**Table 2**).

UC patients were at a higher risk of suffering from a UTI, and this association persisted in adjusted analyses (**Table 2** and **Figure 3**). Multiple UTIs occurred in 9 UC patients (8.0%) and in 5 patients without UC (1.2%,  $p < 0.01$ ). Patients with a UTI had a longer hospital LOS (15 days (IQR: 10–21) vs 11 days (IQR: 8–17),  $p < 0.001$ ) and an increased one-year mortality rate (52.5% vs 34.0%, adjusted HR 1.5; 95% CI: 1.1–2.3;  $p = 0.038$ ).

## DISCUSSION AND CONCLUSION

Among patients admitted to medical wards for acute HF, initial weight loss was not different for the strategy of abstaining from UC compared to UC placement within the first 24 h. Besides, UC had no impact on clinical improvement such as the time needed to reach target weight, discontinue intravenous diuretics or improve respiratory failure, and hospital LOS. Furthermore, UC did not prevent excessive diuresis resulting in low blood pressure episodes or worsening kidney function. However, UC was associated with a higher risk of a UTI.

There are few appropriate indications for UC,<sup>[11]</sup> and 7% to 50% of UCs are done outside these indications.<sup>[18, 19]</sup> Rates of UC subsequent to HF vary greatly and could be very high. In one study, more than half of haemodynamically stable patients underwent UC.<sup>[8]</sup> The rationale for UC in HF is weak yet somehow based on beliefs that it facilitates urine elimination and increases comfort by decreasing toilet visits. However, there is good evidence that UC does not increase the comfort of patients undergoing diuretic therapy, even at high dosages.<sup>[10]</sup> Most guidelines on UC good practice do not list HF as a standard indication.<sup>[20]</sup> Through their *Choosing Wisely* campaigns, Swiss and American authorities recommend avoiding in-dwelling UC for urine output monitoring in stable patients who can void or for patient or staff convenience.<sup>[21, 22]</sup> Indication lists, authorities' recommendations and financial penalties have reduced the overall inappropriate use of UC.<sup>[11]</sup> An American study showed that the proportion of UC among HF patients decreased by 8% between 2009 and 2014.<sup>[7]</sup>

1 Catheter-associated UTIs (CAUTIs) are the second most common infections  
2 associated with patients hospitalised for HF after *Clostridium*-related infections.[<sup>23</sup>]  
3  
4 Previous reports among HF patients found associations between CAUTI and increased  
5  
6 risks of discharge to a skilled care facility, longer hospital LOS, higher total hospital  
7  
8 costs and in-hospital mortality.[<sup>8, 23</sup>] Condom catheters are a better option when  
9  
10 diuresis affects older patients with a disability: they lead to fewer complications,[<sup>24</sup>] are  
11  
12 more comfortable and are less painful than UC.[<sup>10</sup>]  
13  
14  
15  
16  
17  
18  
19  
20  
21

22 The present study is the first to give an insight into the hypothetical clinically relevant  
23  
24 benefits of UC in the context of HF. Using a register of prospective records and  
25  
26 significant adjustments to potential confounding factors (some collected  
27  
28 retrospectively) further strengthened our findings. However, the study has limitations.  
29  
30 Firstly, the cohort preceded some important advances in HF management (e.g.:  
31  
32 sacubitril treatment or SGLT2 inhibitors) that may have changed readmission risk and  
33  
34 mortality. Nevertheless, there were no changes in the 2021 ESC guidelines concerning  
35  
36 the management of acute HF using diuretics, or the relevance of UC insertion in this  
37  
38 indication.[<sup>25</sup>] We thus believe that our study's conclusions remain valid today.  
39  
40  
41 Secondly, the study's retrospective, observational approach only allowed us to  
42  
43 hypothesise that urinary catheters were placed for HF management or to facilitate  
44  
45 diuresis. To minimise these issues, we only selected UCs which occurred in the first  
46  
47 24 h of diuretic therapy. Thirdly, since patients are usually not weighed in emergency  
48  
49 rooms, we focused on the weight change from days 1 to day 3. Thus, UC's impact  
50  
51 during the first 24 h of diuretic therapy was not assessed. A randomised prospective  
52  
53 design, with protocols to guide rapid diuretic adaptation, would be better able to explore  
54  
55 the UC's real potential among HF patients. However, considering current evidence and  
56  
57  
58  
59  
60

1 risks, such a study may never occur. It is of note that records of the amount of urine  
2  
3  
4 passed were only available for half of the patients, with or without UC. Thus, checking  
5  
6 for adequate diuresis after treatment with diuretics might be a simpler, safer  
7  
8 recommendation than UC for improved HF management. Finally, some medical charts  
9  
10 could not be retrieved, but their unavailability was random and unrelated to their UC  
11  
12 status or outcomes. Thus, there is little risk that unavailable charts biased the results.  
13  
14  
15  
16  
17  
18

19 In this retrospective study, with no obvious hourly diuresis-based diuretic adjustment  
20  
21 strategy, UC within 24 h of diuretic therapy initiation had no proven impact on the  
22  
23 clinically relevant outcomes of time to reach target weight, time to resolve respiratory  
24  
25 failure and hospital LOS. The lack of benefits and the increased risk of a UTI preclude  
26  
27 systematic UC for the management of HF.  
28  
29  
30  
31

## 32 **DATA AVAILABILITY**

33  
34  
35  
36 The database, variable explanation, and Stata do-file (in Word format) are available at  
37  
38 request to [gregor.john@h-ne.ch](mailto:gregor.john@h-ne.ch).  
39  
40  
41  
42  
43  
44

## 45 **REFERENCES**

- 46  
47  
48  
49 1. Savarese, G., Lund, L. H. Global Public Health Burden of Heart Failure. *Card Fail Rev.* **3**, 7-11  
50  
51 (2017).  
52  
53  
54 2. Benjamin, E. J. *et al.* Heart Disease and Stroke Statistics-2019 Update: A Report From the  
55  
56 American Heart Association. *Circulation.* **139**, e56-e528 (2019).  
57  
58  
59  
60

- 1  
2  
3  
4  
5  
6  
7  
8  
9  
10  
11  
12  
13  
14  
15  
16  
17  
18  
19  
20  
21  
22  
23  
24  
25  
26  
27  
28  
29  
30  
31  
32  
33  
34  
35  
36  
37  
38  
39  
40  
41  
42  
43  
44  
45  
46  
47  
48  
49  
50  
51  
52  
53  
54  
55  
56  
57  
58  
59  
60
3. Jessup, M. *et al.* 2009 focused update: ACCF/AHA Guidelines for the Diagnosis and Management of Heart Failure in Adults: a report of the American College of Cardiology Foundation/American Heart Association Task Force on Practice Guidelines: developed in collaboration with the International Society for Heart and Lung Transplantation. *Circulation*. **119**, 1977-2016 (2009).
4. McMurray, J. J. *et al.* ESC Guidelines for the diagnosis and treatment of acute and chronic heart failure 2012: The Task Force for the Diagnosis and Treatment of Acute and Chronic Heart Failure 2012 of the European Society of Cardiology. Developed in collaboration with the Heart Failure Association (HFA) of the ESC. *Eur Heart J*. **33**, 1787-847 (2012).
5. Felker, G. M. *et al.* Diuretic strategies in patients with acute decompensated heart failure. *N Engl J Med*. **364**, 797-805 (2011).
6. Felker, G. M., O'Connor, C. M., Braunwald, E. Loop diuretics in acute decompensated heart failure: necessary? Evil? A necessary evil? *Circ Heart Fail*. **2**, 56-62 (2009).
7. Metersky, M. L. *et al.* National trends in the frequency of bladder catheterization and physician-diagnosed catheter-associated urinary tract infections: Results from the Medicare Patient Safety Monitoring System. *Am J Infect Control*. **45**, 901-04 (2017).
8. Jang, A. Y. *et al.* Routine Indwelling Urethral Catheterization in Acute Heart Failure Patients Is Associated With Increased Urinary Tract Complications Without Improved Heart Failure Outcomes. *Circ J*. **82**, 1632-39 (2018).
9. Aoki, T. Appropriate Use of Urinary Catheter in Acute Heart Failure Patients. *Circ J*. **82**, 1505-06 (2018).
10. Saint, S. *et al.* Condom versus indwelling urinary catheters: a randomized trial. *J Am Geriatr Soc*. **54**, 1055-61 (2006).

- 1 11. Meddings, J. *et al.* Reducing unnecessary urinary catheter use and other strategies to  
2 prevent catheter-associated urinary tract infection: an integrative review. *BMJ Qual*  
3  
4 *Saf.* **23**, 277-89 (2014).  
5  
6  
7
- 8 12. Hollingsworth, J. M. *et al.* Determining the noninfectious complications of indwelling  
9 urethral catheters: a systematic review and meta-analysis. *Ann Intern Med.* **159**, 401-  
10  
11  
12  
13 10 (2013).  
14  
15
- 16 13. Garin, N. *et al.* Inclusion into a heart failure critical pathway reduces the risk of death or  
17 readmission after hospital discharge. *Eur J Intern Med.* **23**, 760-4 (2012).  
18  
19
- 20 14. Berra, G. *et al.* Outcome in acute heart failure: prognostic value of acute kidney injury and  
21  
22  
23  
24  
25  
26  
27  
28  
29  
30  
31  
32  
33  
34  
35  
36  
37  
38  
39  
40  
41  
42  
43  
44  
45  
46  
47  
48  
49  
50  
51  
52  
53  
54  
55  
56  
57  
58  
59  
60
15. Anisman SD, Erickson SB, Morden NE. How to prescribe loop diuretics in oedema. *BMJ.*  
**364**; l359 (2019).
16. Sundararajan, V. *et al.* New ICD-10 version of the Charlson comorbidity index predicted in-  
hospital mortality. *J Clin Epidemiol.* **57**, 1288-94 (2004).
17. R Core Team (2017). R: A language and environment for statistical computing. [program],  
2019. R Foundation for Statistical Computing, Vienna, Austria. URL [https://www.R-  
project.org/](https://www.R-project.org/).
18. Saint, S. *et al.* Are physicians aware of which of their patients have indwelling urinary  
catheters? *Am J Med.* **109**, 476-80 (2000).
19. Gokula, R. R., Hickner, J. A., Smith, M. A. Inappropriate use of urinary catheters in elderly  
patients at a midwestern community teaching hospital. *Am J Infect Control.* **32**, 196-9  
(2004).
20. Centers for Disease Control and Prevention. Examples of Appropriate Indications for  
Indwelling Urethral Catheter Use. URL:

1 <https://www.cdc.gov/infectioncontrol/guidelines/cauti/recommendations.html> (last  
2  
3  
4 access: 09.04.2020)  
5

6 21. Physicians ACoE. Choosing Wisely, 2013. URL:

7  
8 [https://www.choosingwisely.org/societies/american-college-of-emergency-  
9  
10  
11 physicians/](https://www.choosingwisely.org/societies/american-college-of-emergency-physicians/) (last access: 09.04.2020)  
12

13 22. Générale SSdmi. Choosing Wisely, 2016. URL: [https://www.smartermedicine.ch/fr/liste-  
14  
15 top-5/infektiologie.html#c15766](https://www.smartermedicine.ch/fr/liste-top-5/infektiologie.html#c15766) (last access: 09.04.2020)  
16  
17

18 23. Miller, P. E. *et al.* National Trends in Healthcare-Associated Infections for Five Common  
19  
20 Cardiovascular Conditions. *Am J Cardiol.* **124**, 1140-48 (2019).  
21  
22

23 24. Saint, S. *et al.* Condom Catheters versus Indwelling Urethral Catheters in Men: A  
24  
25 Prospective, Observational Study. *J Hosp Med.* **14**, E1-E4 (2019).  
26  
27

28 25. McDonagh TA, Metra M, Adamo M, Gardner RS, Baumbach A, Böhm M, et al. 2021 ESC  
29  
30 Guidelines for the diagnosis and treatment of acute and chronic heart failure. *Eur Heart*  
31  
32  
33 *J.* **36**, 3599-726 (2021).  
34  
35  
36  
37  
38  
39  
40  
41  
42  
43  
44  
45  
46  
47  
48  
49  
50  
51  
52  
53  
54  
55  
56  
57  
58  
59  
60

## ACKNOWLEDGEMENTS

**Contributor:** We gratefully acknowledge Elise Dupuis for her help with the statistical analysis.

**Funders:** The study received a grant from Geneva University Hospitals (grant: PRD 1-2017-I).

## AUTHORS CONTRIBUTIONS

**G.J., S.C., N.G., D.C. and J.S.:** planned the study (protocol). **M.A. and G.B.** collected the data. **G.J. and J.S.** performed the analyses. **G.J.** wrote the manuscript. All authors reviewed and approved the final manuscript.

## CONFLICT OF INTEREST STATEMENT

The authors declare no competing interests.

## ABBREVIATIONS

AKI: acute kidney injury

CI: confidence interval

CPAP: continuous positive airway pressure HF: heart failure

HR: hazard ratio

HUG: Geneva University Hospitals



1 KDIGO: Kidney Disease: Improving Global Outcomes  
2

3 LVEF: left ventricular ejection fraction  
4

5 OR: odds ratio UC: urinary catheterisation  
6

7  
8 UTI: urinary tract infection  
9

10  
11  
12  
13  
14  
15  
16  
17  
18  
19  
20  
21  
22  
23  
24  
25  
26  
27  
28  
29  
30  
31  
32  
33  
34  
35  
36  
37  
38  
39  
40  
41  
42  
43  
44  
45  
46  
47  
48  
49  
50  
51  
52  
53  
54  
55  
56  
57  
58  
59  
60

For peer review only

1  
2  
3  
4 **Figure 1:** Predicted excess weight for patients with (black line) and without (green line) urinary  
5 catheterisation (UC). Mean expected excess weights and their confidence intervals were  
6 calculated using an adjusted mixed-effects model assuming mean values for continuous  
7 predictors and a proportion of positive categorical predictors similar to the study sample. UC  
8 had no statistical effect on excess weight evolution over time ( $p$  for interaction = 0.55).  
9  
10  
11  
12  
13  
14  
15  
16  
17  
18  
19  
20  
21

22 **Figure 2:** Time to reach clinical improvement for patients with urinary catheterisation (black  
23 line) and controls (green line): (A) time to reach target weight; (B) time to discontinuation of  
24 intravenous diuretics; (C) time to discontinuation of continuous positive airway pressure  
25 therapy; and (D) time to discontinuation of oxygen supply.  
26  
27  
28  
29  
30  
31  
32  
33  
34  
35  
36  
37  
38

39 **Figure 3:** Time to reach unfavourable outcomes for patients with urinary catheterisation (black  
40 line) and controls (green line): (A) time to first urinary tract infection; (B) time to first all-cause  
41 hospital readmission; (C) time to first heart failure-related readmission; and (D) time to death.  
42  
43  
44  
45  
46  
47  
48  
49  
50  
51  
52  
53  
54  
55  
56  
57  
58  
59  
60

**Table 1:** Characteristics of participants with and without urinary catheterisation (UC). Only UC within 24 h of diuretic therapy initiation was considered. Values are numbers (percentage) unless otherwise stated.

| Characteristic                                     | Cohort<br>(N = 459) | With UC<br>(N = 113) | Without UC<br>N = 346) | P value  |
|----------------------------------------------------|---------------------|----------------------|------------------------|----------|
| Age (y), median (IQR)                              | 81 (73–86)          | 83.5 (76–89)         | 80 (71–85)             | < 0.001  |
| Male                                               | 248 (55.2%)         | 52 (47.3%)           | 196 (57.8%)            | 0.053    |
| Admitted through ER                                | 398 (86.7%)         | 97 (85.8%)           | 301 (87.0%)            | 0.754    |
| Night-time admission (19h00–07h00)                 | 169 (36.8%)         | 37 (32.7%)           | 132 (38.1%)            | 0.301    |
| Current smoker                                     | 79 (18.0%)          | 18 (17.3%)           | 61 (18.1%)             | 0.844*   |
| High blood pressure                                | 331 (73.7%)         | 83 (73.7%)           | 248 (73.2%)            | 0.709    |
| Diabetes                                           | 135 (30.1%)         | 34 (30.9%)           | 101 (29.8%)            | 0.812    |
| Myocardial infarct                                 | 27 (6.1%)           | 6 (5.5%)             | 21 (6.3%)              | 0.762*   |
| FEVG<50%                                           | 203 (45.2%)         | 46 (40.7%)           | 157 (45.4%)            | 0.686    |
| Stroke                                             | 52 (11.8%)          | 18 (16.1%)           | 34 (10.2%)             | 0.076*   |
| Peripheral vascular disease                        | 76 (17.2%)          | 23 (21.1%)           | 53 (15.9%)             | 0.242*   |
| Dementia                                           | 30 (6.8%)           | 9 (8.3%)             | 21 (6.3%)              | 0.482*   |
| COPD                                               | 66 (14.7%)          | 16 (14.5%)           | 50 (14.7%)             | 0.958*   |
| Oncological disease                                | 32 (7.2%)           | 8 (7.3%)             | 24 (7.2%)              | 0.963*   |
| Liver disease                                      | 24 (5.4%)           | 7 (6.4%)             | 17 (5.1%)              | 0.598*   |
| CKD                                                |                     |                      |                        |          |
| II                                                 | 174 (38.7%)         | 39 (35.4%)           | 135 (39.2%)            | 0.380    |
| III                                                | 154 (34.4%)         | 40 (36.4%)           | 114 (33.6%)            |          |
| IV                                                 | 22 (4.9%)           | 6 (5.5%)             | 16 (4.7%)              |          |
| V                                                  | 2 (0.5%)            | 0                    | 2 (0.6%)               |          |
| Charlson comorbidity index, median (IQR)           | 3 (1–4)             | 3 (2–4)              | 3 (1–4)                | 0.115    |
| <b>Pre-admission medication</b>                    |                     |                      |                        |          |
| ACE/ARB                                            | 290 (64.6%)         | 65 (59.1%)           | 225 (66.4%)            | 0.165    |
| Beta-blocker                                       | 204 (45.4%)         | 49 (44.5%)           | 155 (45.7%)            | 0.829    |
| Aldosterone inhibitor                              | 62 (13.8%)          | 14 (12.7%)           | 48 (14.2%)             | 0.753*   |
| Diuretics                                          | 239 (52.1%)         | 66 (58.4%)           | 173 (50.0%)            | 0.120    |
| <b>Admission characteristics</b>                   |                     |                      |                        |          |
| Median sodium level (mmol/l) at admission (IQR)    | 137 (134–140)       | 137 (133–139)        | 138 (135–140)          | 0.022    |
| Median NT-proBNP level (ng/l) at admission (IQR)   | 6377 (3069–13254)   | 7700 (4080–16204)    | 6206 (2700–12101)      | 0.124    |
| Median haemoglobin level (g/l) at admission (IQR)  | 123 (109–137)       | 119 (107–133)        | 125 (110–138)          | 0.115    |
| Median creatinin level (mmol/l) at admission (IQR) | 107 (85–148)        | 116 (89–197)         | 104 (83–138)           | 0.005    |
| Heart rate (beat/min), median (IQR)                | 81 (70–94)          | 82.5 (70–91)         | 80 (69.5–95)           | 0.785    |
| Mean blood pressure (mmHg), median (IQR)           | 90 (80–100)         | 88.3 (78.3–100)      | 90 (80.3–100)          | 0.162    |
| AKI                                                |                     |                      |                        |          |
| I                                                  | 143 (31.5%)         | 46 (41.8%)           | 97 (28.6%)             | 0.002*   |
| II                                                 | 24 (5.3%)           | 9 (8.2%)             | 15 (4.4%)              |          |
| III                                                | 5 (1.1%)            | 3 (2.7%)             | 2 (0.6%)               |          |
| Respiratory failure:                               | 371 (80.8%)         | 105 (92.9%)          | 266 (76.9%)            | < 0.001* |
| - Needs oxygen supply                              | 365 (79.5%)         | 104 (92.0%)          | 261 (75.4%)            |          |
| - CPAP                                             | 75 (16.3%)          | 27 (23.9%)           | 48 (13.9%)             |          |
| Volume overload                                    | 342 (74.5%)         | 86 (76.1%)           | 256 (74.0%)            | 0.654    |
| - Target weight (kg), median (IQR)                 | 69.2 (58.1–80.8)    | 70 (58–81.4)         | 68.7 (58.6–80.5)       |          |
| Intravenous therapy                                | 431 (93.9%)         | 108 (95.6%)          | 323 (93.4%)            | 0.391*   |
| Continuous intravenous diuretic therapy            | 42 (9.2%)           | 15 (13.4%)           | 27 (7.8%)              | 0.076*   |

|    |                                                                                                   |            |            |            |         |
|----|---------------------------------------------------------------------------------------------------|------------|------------|------------|---------|
| 1  | Initial diuretic doses (mg), median                                                               | 40 (30–80) | 60 (40–90) | 40 (20–60) | < 0.001 |
| 2  | (IQR)                                                                                             |            |            |            |         |
| 3  | * Fischer test                                                                                    |            |            |            |         |
| 4  | ACE, angiotensin-converting-enzyme inhibitor; AKI, acute kidney injury; ARB, angiotensin receptor |            |            |            |         |
| 5  | blockers; CKD, chronic kidney disease by CKD-EPI classification; COPD, chronic obstructive        |            |            |            |         |
| 6  | pulmonary disease; CPAP, continuous positive airway pressure therapy; ER, emergency room; UC:     |            |            |            |         |
| 7  | urinary catheterisation                                                                           |            |            |            |         |
| 8  |                                                                                                   |            |            |            |         |
| 9  |                                                                                                   |            |            |            |         |
| 10 |                                                                                                   |            |            |            |         |
| 11 |                                                                                                   |            |            |            |         |
| 12 |                                                                                                   |            |            |            |         |
| 13 |                                                                                                   |            |            |            |         |
| 14 |                                                                                                   |            |            |            |         |
| 15 |                                                                                                   |            |            |            |         |
| 16 |                                                                                                   |            |            |            |         |
| 17 |                                                                                                   |            |            |            |         |
| 18 |                                                                                                   |            |            |            |         |
| 19 |                                                                                                   |            |            |            |         |
| 20 |                                                                                                   |            |            |            |         |
| 21 |                                                                                                   |            |            |            |         |
| 22 |                                                                                                   |            |            |            |         |
| 23 |                                                                                                   |            |            |            |         |
| 24 |                                                                                                   |            |            |            |         |
| 25 |                                                                                                   |            |            |            |         |
| 26 |                                                                                                   |            |            |            |         |
| 27 |                                                                                                   |            |            |            |         |
| 28 |                                                                                                   |            |            |            |         |
| 29 |                                                                                                   |            |            |            |         |
| 30 |                                                                                                   |            |            |            |         |
| 31 |                                                                                                   |            |            |            |         |
| 32 |                                                                                                   |            |            |            |         |
| 33 |                                                                                                   |            |            |            |         |
| 34 |                                                                                                   |            |            |            |         |
| 35 |                                                                                                   |            |            |            |         |
| 36 |                                                                                                   |            |            |            |         |
| 37 |                                                                                                   |            |            |            |         |
| 38 |                                                                                                   |            |            |            |         |
| 39 |                                                                                                   |            |            |            |         |
| 40 |                                                                                                   |            |            |            |         |
| 41 |                                                                                                   |            |            |            |         |
| 42 |                                                                                                   |            |            |            |         |
| 43 |                                                                                                   |            |            |            |         |
| 44 |                                                                                                   |            |            |            |         |
| 45 |                                                                                                   |            |            |            |         |
| 46 |                                                                                                   |            |            |            |         |
| 47 |                                                                                                   |            |            |            |         |
| 48 |                                                                                                   |            |            |            |         |
| 49 |                                                                                                   |            |            |            |         |
| 50 |                                                                                                   |            |            |            |         |
| 51 |                                                                                                   |            |            |            |         |
| 52 |                                                                                                   |            |            |            |         |
| 53 |                                                                                                   |            |            |            |         |
| 54 |                                                                                                   |            |            |            |         |
| 55 |                                                                                                   |            |            |            |         |
| 56 |                                                                                                   |            |            |            |         |
| 57 |                                                                                                   |            |            |            |         |
| 58 |                                                                                                   |            |            |            |         |
| 59 |                                                                                                   |            |            |            |         |
| 60 |                                                                                                   |            |            |            |         |

For peer review only

**Table 2:** Clinical improvements and adverse outcomes with and without urinary catheterisation. Values are numbers unless otherwise stated.

| <b>Time to clinical improvement</b>                                            | <b>With UC</b> | <b>Without UC</b> | <b>HR</b>      | <b>Adjusted HR</b> |
|--------------------------------------------------------------------------------|----------------|-------------------|----------------|--------------------|
| Time to target weight (d), median (IQR)                                        | 6 (3–7)        | 6 (3–7)           | 1.1 (0.8–1.5)  | 1.0 (0.7–1.5)      |
| Time to switch/discontinuation of intravenous diuretics (d), median (IQR)      | 4 (2–8)        | 3 (1–6)           | 0.8 (0.7–1.0)  | 0.9 (0.7–1.2)      |
| Time to discontinuation of CPAP (d), median (IQR)                              | 4 (2–6)        | 4 (2–5)           | 1.2 (0.7–2.2)  | 1.1 (0.5–2.4)      |
| Time to discontinuation of oxygen supply (d), median (IQR)                     | 4 (2–8)        | 3 (1–7)           | 0.8 (0.6–1.0)  | 0.9 (0.7–1.2)      |
| <b>Time to adverse events</b>                                                  | <b>With UC</b> | <b>Without UC</b> | <b>HR</b>      | <b>Adjusted HR</b> |
| Urinary tract infection, n (%)                                                 | 37 (32.7%)     | 46 (13.3%)        | 2.9 (1.8–4.8)* | 2.5 (1.5–4.2)*     |
| One-year all-cause hospital readmission, n (%)                                 | 56 (50.9%)     | 193 (56.9%)       | 1.1 (0.8–1.4)  | 1.1 (0.8–1.4)      |
| One-year heart failure-related hospital readmission, n (%)                     | 28 (25.5%)     | 91 (26.8%)        | 1.1 (0.7–1.7)  | 1.1 (0.7–1.7)      |
| One-year mortality, n (%)                                                      | 51 (50.0%)     | 101 (33.4%)       | 1.7 (1.2–2.4)* | 1.4 (1.0–2.1)      |
| <b>Other secondary outcomes</b>                                                | <b>With UC</b> | <b>Without UC</b> | <b>OR</b>      | <b>Adjusted OR</b> |
| Initial treatment failure                                                      | 23 (26.7%)     | 78 (30.5%)        | 0.8 (0.5–1.4)  | 0.8 (0.4–1.4)      |
| Low blood pressure episode                                                     | 49 (43.7%)     | 154 (44.6%)       | 1.0 (0.6–1.5)  | 1.1 (0.7–1.7)      |
| - Need of saline perfusion                                                     | 24/49 (49.0)   | 67/154 (43.5)     |                |                    |
| Worsening of renal function                                                    |                |                   |                |                    |
| 0                                                                              | 82 (74.6%)     | 260 (76.7%)       | 1.1 (0.7–1.8)† | 1.1 (0.7–1.8)†     |
| 1                                                                              | 27 (24.6%)     | 73 (21.5%)        |                |                    |
| 2                                                                              | 1 (-)          | 6 (1.8%)          |                |                    |
| * <i>p</i> value < 0.05; † OR of changing to a worse category                  |                |                   |                |                    |
| CPAP, continuous positive airway pressure therapy; UC, urinary catheterisation |                |                   |                |                    |



Predicted excess weight for patients with (black line) and without (green line) urinary catheterisation (UC). Mean expected excess weights and their confidence intervals were calculated using an adjusted mixed-effects model assuming mean values for continuous predictors and a proportion of positive categorical predictors similar to the study sample. UC had no statistical effect on excess weight evolution over time ( $p$  for interaction = 0.55).

296x209mm (150 x 150 DPI)

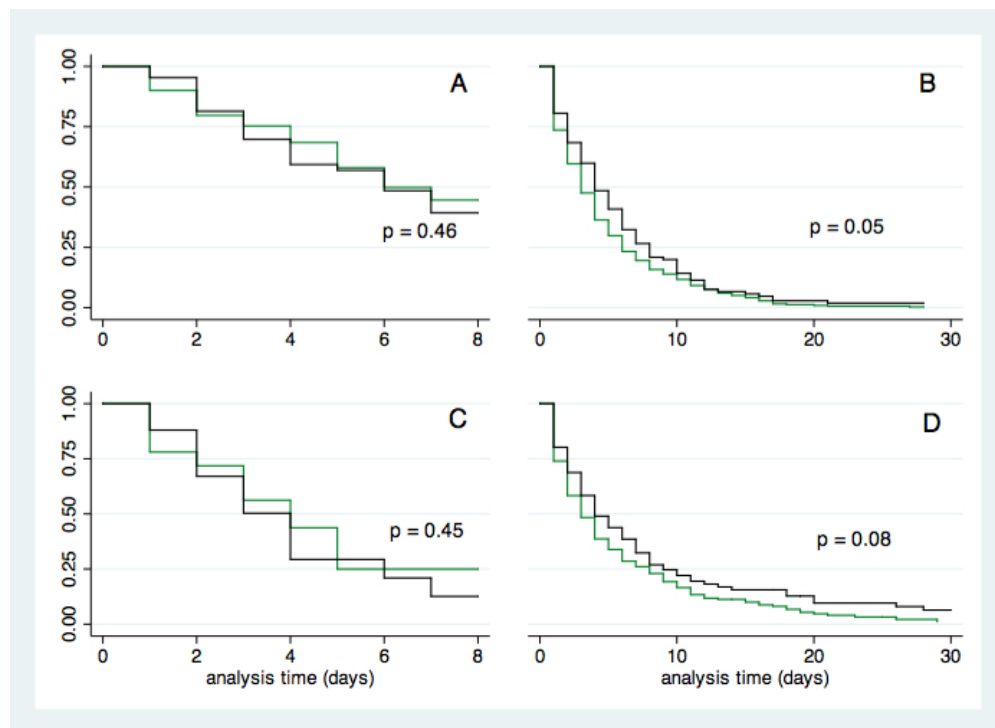

Time to reach clinical improvement for patients with urinary catheterisation (black line) and controls (green line): (A) time to reach target weight; (B) time to discontinuation of intravenous diuretics; (C) time to discontinuation of continuous positive airway pressure supply; and (D) time to discontinuation of oxygen supply.

244x178mm (72 x 72 DPI)



Time to reach unfavourable outcomes for patients with urinary catheterisation (black line) and controls (green line): (A) time to first urinary tract infection; (B) time to first all-cause hospital readmission; (C) time to first heart failure-related readmission; and (D) time to death.

244x178mm (72 x 72 DPI)



## STROBE Statement—checklist of items that should be included in reports of observational studies

|                              | Item No. | Recommendation                                                                                                                                                                                                                                                                                                                                                                                                                                                         | Page No. | Relevant text from manuscript |
|------------------------------|----------|------------------------------------------------------------------------------------------------------------------------------------------------------------------------------------------------------------------------------------------------------------------------------------------------------------------------------------------------------------------------------------------------------------------------------------------------------------------------|----------|-------------------------------|
| <b>Title and abstract</b>    | 1        | (a) Indicate the study's design with a commonly used term in the title or the abstract                                                                                                                                                                                                                                                                                                                                                                                 | 1, 3     |                               |
|                              |          | (b) Provide in the abstract an informative and balanced summary of what was done and what was found                                                                                                                                                                                                                                                                                                                                                                    | 3,4      |                               |
| <b>Introduction</b>          |          |                                                                                                                                                                                                                                                                                                                                                                                                                                                                        |          |                               |
| Background/rationale         | 2        | Explain the scientific background and rationale for the investigation being reported                                                                                                                                                                                                                                                                                                                                                                                   | 5        |                               |
| Objectives                   | 3        | State specific objectives, including any prespecified hypotheses                                                                                                                                                                                                                                                                                                                                                                                                       | 5-6      |                               |
| <b>Methods</b>               |          |                                                                                                                                                                                                                                                                                                                                                                                                                                                                        |          |                               |
| Study design                 | 4        | Present key elements of study design early in the paper                                                                                                                                                                                                                                                                                                                                                                                                                | 6        |                               |
| Setting                      | 5        | Describe the setting, locations, and relevant dates, including periods of recruitment, exposure, follow-up, and data collection                                                                                                                                                                                                                                                                                                                                        | 6-7      |                               |
| Participants                 | 6        | (a) <i>Cohort study</i> —Give the eligibility criteria, and the sources and methods of selection of participants. Describe methods of follow-up<br><i>Case-control study</i> —Give the eligibility criteria, and the sources and methods of case ascertainment and control selection. Give the rationale for the choice of cases and controls<br><i>Cross-sectional study</i> —Give the eligibility criteria, and the sources and methods of selection of participants | 6-7      |                               |
|                              |          | (b) <i>Cohort study</i> —For matched studies, give matching criteria and number of exposed and unexposed<br><i>Case-control study</i> —For matched studies, give matching criteria and the number of controls per case                                                                                                                                                                                                                                                 | 10-11    |                               |
| Variables                    | 7        | Clearly define all outcomes, exposures, predictors, potential confounders, and effect modifiers. Give diagnostic criteria, if applicable                                                                                                                                                                                                                                                                                                                               | 9        |                               |
| Data sources/<br>measurement | 8*       | For each variable of interest, give sources of data and details of methods of assessment (measurement). Describe comparability of assessment methods if there is more than one group                                                                                                                                                                                                                                                                                   | 9        |                               |
| Bias                         | 9        | Describe any efforts to address potential sources of bias                                                                                                                                                                                                                                                                                                                                                                                                              | 10       |                               |
| Study size                   | 10       | Explain how the study size was arrived at                                                                                                                                                                                                                                                                                                                                                                                                                              | NA       |                               |

Continued on next page

|                        |     |                                                                                                                                                                                                                    |                  |
|------------------------|-----|--------------------------------------------------------------------------------------------------------------------------------------------------------------------------------------------------------------------|------------------|
| Quantitative variables | 11  | Explain how quantitative variables were handled in the analyses. If applicable, describe which groupings were chosen and why                                                                                       | 10               |
| Statistical methods    | 12  | (a) Describe all statistical methods, including those used to control for confounding                                                                                                                              | 9-11             |
|                        |     | (b) Describe any methods used to examine subgroups and interactions                                                                                                                                                | NA               |
|                        |     | (c) Explain how missing data were addressed                                                                                                                                                                        | 6                |
|                        |     | (d) <i>Cohort study</i> —If applicable, explain how loss to follow-up was addressed                                                                                                                                | 10-11            |
|                        |     | <i>Case-control study</i> —If applicable, explain how matching of cases and controls was addressed<br><i>Cross-sectional study</i> —If applicable, describe analytical methods taking account of sampling strategy |                  |
|                        |     | (e) Describe any sensitivity analyses                                                                                                                                                                              | 10               |
| <b>Results</b>         |     |                                                                                                                                                                                                                    |                  |
| Participants           | 13* | (a) Report numbers of individuals at each stage of study—eg numbers potentially eligible, examined for eligibility, confirmed eligible, included in the study, completing follow-up, and analysed                  | 12-14, table 1-2 |
|                        |     | (b) Give reasons for non-participation at each stage                                                                                                                                                               |                  |
|                        |     | (c) Consider use of a flow diagram                                                                                                                                                                                 |                  |
| Descriptive data       | 14* | (a) Give characteristics of study participants (eg demographic, clinical, social) and information on exposures and potential confounders                                                                           | Table 1          |
|                        |     | (b) Indicate number of participants with missing data for each variable of interest                                                                                                                                | 12               |
|                        |     | (c) <i>Cohort study</i> —Summarise follow-up time (eg, average and total amount)                                                                                                                                   | Figure2-3        |
| Outcome data           | 15* | <i>Cohort study</i> —Report numbers of outcome events or summary measures over time                                                                                                                                | Figure2-3        |
|                        |     | <i>Case-control study</i> —Report numbers in each exposure category, or summary measures of exposure                                                                                                               | NA               |
|                        |     | <i>Cross-sectional study</i> —Report numbers of outcome events or summary measures                                                                                                                                 |                  |
| Main results           | 16  | (a) Give unadjusted estimates and, if applicable, confounder-adjusted estimates and their precision (eg, 95% confidence interval). Make clear which confounders were adjusted for and why they were included       | Table2           |
|                        |     | (b) Report category boundaries when continuous variables were categorized                                                                                                                                          |                  |
|                        |     | (c) If relevant, consider translating estimates of relative risk into absolute risk for a meaningful time period                                                                                                   |                  |

Continued on next page

|                          |    |                                                                                                                                                                            |       |
|--------------------------|----|----------------------------------------------------------------------------------------------------------------------------------------------------------------------------|-------|
| Other analyses           | 17 | Report other analyses done—eg analyses of subgroups and interactions, and sensitivity analyses                                                                             | 12    |
| <b>Discussion</b>        |    |                                                                                                                                                                            |       |
| Key results              | 18 | Summarise key results with reference to study objectives                                                                                                                   | 14    |
| Limitations              | 19 | Discuss limitations of the study, taking into account sources of potential bias or imprecision. Discuss both direction and magnitude of any potential bias                 | 16    |
| Interpretation           | 20 | Give a cautious overall interpretation of results considering objectives, limitations, multiplicity of analyses, results from similar studies, and other relevant evidence | 16    |
| Generalisability         | 21 | Discuss the generalisability (external validity) of the study results                                                                                                      | 16    |
| <b>Other information</b> |    |                                                                                                                                                                            |       |
| Funding                  | 22 | Give the source of funding and the role of the funders for the present study and, if applicable, for the original study on which the present article is based              | 16-17 |

\*Give information separately for cases and controls in case-control studies and, if applicable, for exposed and unexposed groups in cohort and cross-sectional studies.

**Note:** An Explanation and Elaboration article discusses each checklist item and gives methodological background and published examples of transparent reporting. The STROBE checklist is best used in conjunction with this article (freely available on the Web sites of PLoS Medicine at <http://www.plosmedicine.org/>, Annals of Internal Medicine at <http://www.annals.org/>, and Epidemiology at <http://www.epidem.com/>). Information on the STROBE Initiative is available at [www.strobe-statement.org](http://www.strobe-statement.org).

# BMJ Open

## Risks and benefits of urinary catheterisation during inpatient diuretic therapy for acute heart failure: A retrospective, non-inferiority, cohort study

|                                 |                                                                                                                                                                                                                                                                                                                                                                                                                                                                                                                                                                                                                                                                                          |
|---------------------------------|------------------------------------------------------------------------------------------------------------------------------------------------------------------------------------------------------------------------------------------------------------------------------------------------------------------------------------------------------------------------------------------------------------------------------------------------------------------------------------------------------------------------------------------------------------------------------------------------------------------------------------------------------------------------------------------|
| Journal:                        | <i>BMJ Open</i>                                                                                                                                                                                                                                                                                                                                                                                                                                                                                                                                                                                                                                                                          |
| Manuscript ID                   | bmjopen-2021-053632.R2                                                                                                                                                                                                                                                                                                                                                                                                                                                                                                                                                                                                                                                                   |
| Article Type:                   | Original research                                                                                                                                                                                                                                                                                                                                                                                                                                                                                                                                                                                                                                                                        |
| Date Submitted by the Author:   | 14-Jun-2022                                                                                                                                                                                                                                                                                                                                                                                                                                                                                                                                                                                                                                                                              |
| Complete List of Authors:       | John, Gregor; Hôpitaux Universitaires Genève, Department of Internal Medicine; Université de Genève, Department of Medicine<br>Arcens, Marc; Hôpitaux Universitaires Genève, Department of Medicine<br>Berra, Gregory; Hôpitaux Universitaires Genève, Department of Medicine<br>Garin, Nicolas; Hôpitaux Universitaires Genève, Department of Medicine; Université de Genève<br>Carballo, David ; Université de Genève; Hôpitaux Universitaires Genève, Department of Medicine<br>Carballo, Sebastian; Hôpitaux Universitaires Genève, Department of Medicine; Université de Genève<br>Stirнемann, Jerome; Hôpitaux Universitaires Genève, Department of Medicine; Université de Genève |
| <b>Primary Subject Heading</b>: | Cardiovascular medicine                                                                                                                                                                                                                                                                                                                                                                                                                                                                                                                                                                                                                                                                  |
| Secondary Subject Heading:      | Medical management, Infectious diseases, Geriatric medicine, Evidence based practice                                                                                                                                                                                                                                                                                                                                                                                                                                                                                                                                                                                                     |
| Keywords:                       | Heart failure < CARDIOLOGY, Urinary tract infections < UROLOGY, Health & safety < HEALTH SERVICES ADMINISTRATION & MANAGEMENT                                                                                                                                                                                                                                                                                                                                                                                                                                                                                                                                                            |
|                                 |                                                                                                                                                                                                                                                                                                                                                                                                                                                                                                                                                                                                                                                                                          |

SCHOLARONE™  
Manuscripts

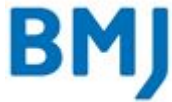

I, the Submitting Author has the right to grant and does grant on behalf of all authors of the Work (as defined in the below author licence), an exclusive licence and/or a non-exclusive licence for contributions from authors who are: i) UK Crown employees; ii) where BMJ has agreed a CC-BY licence shall apply, and/or iii) in accordance with the terms applicable for US Federal Government officers or employees acting as part of their official duties; on a worldwide, perpetual, irrevocable, royalty-free basis to BMJ Publishing Group Ltd ("BMJ") its licensees and where the relevant Journal is co-owned by BMJ to the co-owners of the Journal, to publish the Work in this journal and any other BMJ products and to exploit all rights, as set out in our [licence](#).

The Submitting Author accepts and understands that any supply made under these terms is made by BMJ to the Submitting Author unless you are acting as an employee on behalf of your employer or a postgraduate student of an affiliated institution which is paying any applicable article publishing charge ("APC") for Open Access articles. Where the Submitting Author wishes to make the Work available on an Open Access basis (and intends to pay the relevant APC), the terms of reuse of such Open Access shall be governed by a Creative Commons licence – details of these licences and which [Creative Commons](#) licence will apply to this Work are set out in our licence referred to above.

Other than as permitted in any relevant BMJ Author's Self Archiving Policies, I confirm this Work has not been accepted for publication elsewhere, is not being considered for publication elsewhere and does not duplicate material already published. I confirm all authors consent to publication of this Work and authorise the granting of this licence.

**Title:** Risks and benefits of urinary catheterisation during inpatient diuretic therapy for acute heart failure: A retrospective, non-inferiority, cohort study

**Running headline:** urinary catheterisation in acute heart failure.

Gregor John<sup>1,2,3\*</sup>, Marc Arcens<sup>2</sup>, Gregory Berra<sup>2</sup>, Nicolas Garin<sup>2,3</sup>, David Carballo<sup>3,4</sup>, Sebastian Carballo<sup>2,3</sup>, Jérôme Stirnemann<sup>2,3</sup>.

1. Department of Internal Medicine, Neuchâtel Hospital Network, Rue de la Maladière 45, CH-2000 Neuchâtel, Switzerland

2. Department of Medicine, Geneva University Hospitals (HUG), Gabrielle-Perret-Gentil 4, CH-1205 Geneva, Switzerland; Fax: 0041 32 967 27 29, Phone: 0041 79 559 59 29; gregor.john@h-ne.ch (may be published).

3. Geneva university, Michel-Servet 1, 1211 Genève 4, Switzerland.

4. Cardiology Service, Department of Medicine, Geneva University Hospitals (HUG), Gabrielle-Perret-Gentil 4, CH-1205 Geneva, david.carballo@hcuge.ch

**\*Gregor John<sup>1,2,3\*</sup>**, PD, MD (correspondence and requests for reprints); Department of Internal Medicine, Neuchâtel Hospital Network, Rue de la Maladière 45, CH-2000 Neuchâtel, Switzerland. Fax: 0041 32 967 27 29, Phone: 0041 79 559 59 29; gregor.john@h-ne.ch (may be published).

**Number of References:** 30, **Tables:** 2, **Figures:** 3, and **Appendix:** 7

**Word counts:** Abstract: 295; Text: 2977

**Keywords:** Heart-failure, diuretics, urinary catheter, non-inferiority study, hospital readmission, mortality

## ABSTRACT:

**Objectives:** Patients with acute congestive heart failure (HF) regularly undergo urinary catheterisation (UC) at hospital admission. We hypothesised that UC has no clinical benefits with regard to weight loss during inpatient diuretic therapy for acute congestive HF and increases the risk of urinary tract infection (UTI).

**Design:** Retrospective, non-inferiority study.

**Setting:** Geneva University Hospitals' Department of Medicine, a tertiary centre.

**Participants:** In a cohort of HF patients, those catheterised within 24 h of diuretic therapy (n=113) were compared with non-catheterised patients (n=346).

**Primary and secondary outcome measures:** The primary endpoint was weight loss 48 h after starting diuretic therapy. Secondary endpoints were time needed to reach target weight, discontinuation of intravenous diuretics, and resolution of respiratory failure. Complications included the time to a first UTI, first hospital readmission and death.

**Results:** 48 h weight loss was not statistically different between groups and the adjusted difference was below the non-inferiority boundary of 1 kg (0.43 kg (95% CI: -0.03–0.88) in favour of UC,  $p < 0.01$  for non-inferiority). UC was not associated with time to reaching target weight (adjusted HR 1.0; 95%CI: 0.7–1.5), discontinuation of intravenous diuretics (aHR 0.9; 95%CI: 0.7–1.2), or resolution of respiratory failure (aHR 1.1; 95%CI: 0.5–2.4). UC increased the risk of UTI (aHR 2.5; 95%CI: 1.5–4.2) but was not associated with hospital readmission (aHR 1.1, 95%CI: 0.8–1.4) or one-year mortality (aHR 1.4; 95%CI: 1.0–2.1).

**Conclusion:** In this retrospective study, with no obvious hourly diuresis-based diuretic adjustment strategy, weight loss without UC was not inferior to weight loss after UC

1 within 24 h of initiating diuretic treatment. UC had no impact on clinical improvement  
2  
3 and increased the risk of UTI. This evidence, therefore, argues against the systematic  
4  
5 use of UC during a diuretic therapy for HF.  
6  
7  
8  
9  
10

## 11 **‘STRENGTHS AND LIMITATIONS OF THIS STUDY’**

- 17 • The present study is the first to give an insight into the hypothetical clinically  
18 relevant benefits of UC in the context of HF.  
19
- 20 • The preceded the advent of sacubitril or SGLT2 inhibitors therapy.  
21  
22 Nevertheless, in 2021, updated ESC guidelines did not evolve regarding  
23  
24 diuretics or the relevance of UC insertion for the management of acute  
25  
26 decompensate HF.  
27
- 28 • The study’s retrospective, observational approach only allowed us to  
29  
30 hypothesise that urinary catheters were placed for HF management or to  
31  
32 facilitate diuresis.  
33
- 34 • Since patients are usually not weighed in emergency rooms, we focused on the  
35  
36 weight change from days 1 to day 3. Thus, UC’s impact during the first 24 h of  
37  
38 diuretic therapy was not assessed.  
39
- 40 • A randomised prospective design, with protocols to guide rapid diuretic  
41  
42 adaptation, would be better able to explore the UC’s real potential among HF  
43  
44 patients. However, considering current evidence and risks, such a study may  
45  
46 never occur.  
47  
48  
49  
50  
51  
52  
53  
54  
55  
56  
57  
58  
59  
60



## INTRODUCTION:

Heart failure (HF) is a major public health concern, affecting 2% of the developed world's population.<sup>[1]</sup> Patients with HF are hospitalised about once a year, on average.<sup>[2]</sup> Due to population aging and the growing prevalence of comorbidities, the absolute number of hospital admissions for HF is expected to increase by as much as 50% over the next 25 years.<sup>[1, 3, 4]</sup>

Diuretics are the mainstay treatments for volume overload.<sup>[5, 6]</sup> Nevertheless, overly aggressive or insufficient treatments can result in acute kidney injury, electrolytic imbalance, low blood pressure, prolonged hospital length of stay (LOS) or early hospital readmission.<sup>[7, 8]</sup> Assessing adequate response to diuretics, e.g. measuring diuresis, is therefore important and enables rapid treatment adjustment. This may be as or even more useful than how diuretics are initially administered.<sup>[7, 9]</sup>

Between one quarter <sup>[10]</sup> and one half of patients <sup>[11]</sup> hospitalised for HF undergoes in-dwelling urinary catheter placement (UC). The rationale for UC in this population sometimes includes managing hypervolemia <sup>[11, 12]</sup> or improving comfort during diuretic treatment.<sup>[13]</sup> By maximising the elimination of liquids while avoiding excessive losses, UC could theoretically have a positive impact on hospital LOS, readmission rates and even death. Although the benefits of UC remain uncertain, the risks of increased urinary tract infections (UTI) and traumatic complications are well known.<sup>[11, 14, 15]</sup> A recent retrospective study of catheterised HF patients showed no impact on LOS and an increased risk of infection.<sup>[11]</sup> Little evidence exists on UC's impact on clinically relevant improvements such as weight loss, time to improvement

1 of respiratory failure or time to discontinuation of intravenous therapy. The present  
2  
3 study aimed to determine the risks and clinical benefits of UC among patients  
4  
5 hospitalised for congestive HF, with the a priori hypothesis that HF management with  
6  
7 UC is not better than without it.  
8  
9

## 10 11 12 13 14 15 **PATIENTS AND METHODS** 16

17  
18  
19 We conducted a retrospective, non-inferiority, cohort study using a pre-existing cohort  
20  
21 of patients admitted to Geneva University Hospitals' Department of Medicine for acute  
22  
23 HF between 01.01.2006 and 01.01.2010.<sup>[16, 17]</sup> Patients were followed for one year or  
24  
25 until death. The institutional review board approved the study and the need for informed  
26  
27 consent to collect retrospectively information, was waived by the ethics committee  
28  
29 (Comission cantonale d'éthique de la recherche (CCER)). Reporting and analyses  
30  
31 were performed according to the Strengthening the Reporting of Observational Studies  
32  
33 in Epidemiology (STROBE) statement.  
34  
35  
36  
37  
38  
39  
40

### 41 **STUDY POPULATION** 42

43  
44  
45 All patients aged 18 years old or more, requiring hospital admission for a primary  
46  
47 symptom of dyspnoea and a diagnosis of acute decompensated HF were eligible.<sup>[16,</sup>  
48  
49 <sup>17]</sup> Acute decompensated HF was diagnosed from patients' clinical presentation, risk  
50  
51 factors and treatment responsiveness and/or was supported by structural or functional  
52  
53 echocardiographic anomalies. Patients with a final diagnosis other than HF that  
54  
55 explained their dyspnoea, with a low NT-proBNP level (<300ng/l), who were admitted  
56  
57 to the intensive care unit, whose paper medical charts for the index admission were  
58  
59  
60

1 unavailable or who did not receive diuretics during their first seven days of  
2  
3 hospitalisation were excluded. We compared patients who underwent UC insertion  
4  
5 within 24 h of diuretic therapy initiation with those not catheterised.  
6  
7  
8  
9  
10

## 11 **OUTCOMES**

12  
13  
14  
15 The primary endpoint was the 48 h weight loss after starting diuretic therapy.  
16  
17 Secondary endpoints were persistent excess weight at 72 h and at one week, the time  
18  
19 needed to reach clinical improvement (reaching target weight (+/- 0.5 kg),  
20  
21 discontinuation of intravenous diuretics, oxygen supply and continuous positive airway  
22  
23 pressure (CPAP)), and hospital LOS.  
24  
25  
26  
27  
28  
29

30 Complications included the proportion of patients with UTI, initial diuretic treatment  
31  
32 failure, worsening kidney function and episodes of low blood pressure, and time to a  
33  
34 first UTI, first hospital readmission and death. Initial treatment failure was defined as a  
35  
36 need for increased doses of diuretics, or a switch from oral to intravenous diuretic  
37  
38 therapy or from a bolus to a continuous intravenous diuretic therapy two days or more  
39  
40 after the initiation of diuretics. Diuretic dose increases before that point were  
41  
42 considered to be usual treatment adjustments.  
43  
44  
45  
46  
47  
48  
49

## 50 **DATA COLLECTION AND VARIABLE DEFINITION**

51  
52  
53 Data extracted from medical charts included pre-admission diuretic use, micturition  
54  
55 volumes during diuretic therapy, weight at discharge and, for the first seven days, daily  
56  
57  
58  
59  
60

1 information on the UC, weight, diuretics administration, clinical parameters, oxygen  
2 supply and use of CPAP therapy.  
3  
4  
5  
6  
7  
8  
9

10 Volume overload (hypervolaemia) was defined as excess weight at diuretic therapy.  
11 We calculated excess weight by subtracting target weight from other weights  
12 measured during hospitalisation. Target weight was defined as the patient's weight at  
13 discharge or, when unavailable, the lowest weight during hospitalisation that did not  
14 result in increased creatinaemia or low blood pressure. Since patients are not always  
15 weighed on admission day, 48 h weight loss was calculated between days 1 and 3  
16 after starting diuretic therapy (day 0). When weight on day 1 or on day 3 was missing,  
17 we took double the mean daily weight loss calculated between day 0 and day 4.  
18  
19  
20  
21  
22  
23  
24  
25  
26  
27  
28  
29  
30  
31  
32

33 Respiratory failure was defined as the need for oxygen supply or CPAP. We noted  
34 episodes of low blood pressure (systolic pressure < 100 mmHg) and the need for  
35 saline perfusion. Daily doses of torasemide were multiplied by two and doses of oral  
36 furosemide were divided by two to convert daily diuretics use into an equivalent  
37 intravenous furosemide dosage.<sup>[18]</sup>  
38  
39  
40  
41  
42  
43  
44  
45  
46  
47  
48  
49  
50  
51  
52  
53  
54  
55  
56  
57  
58  
59  
60

We obtained patients' habitual kidney function from their general practitioner.<sup>[17]</sup>  
Kidney function at hospital admission and during the first week was extracted from the  
laboratory database. We defined acute kidney injury (AKI) as any kidney function at  
admission lower than its usual value, and worsening kidney function (WKF) as kidney  
function that decreased during hospitalisation relative to admission values.<sup>[17]</sup> AKI and  
WKF were scored according to the KDIGO classification. An absolute increase in the

1 creatinine value of 26.4 mmol/L, or a 1.5 to <2-fold increase over the baseline  
2  
3 creatinine value was defined stage I. A  $\geq 2$  to <3-fold increase was defined as stage II  
4  
5 and a  $\geq 3$ -fold increase or use of dialysis was determined as stage III.  
6  
7

8  
9 Comorbidity burdens were summarised using Charlson index, calculated using the  
10  
11 CIM-10 codes from electronic medical charts.<sup>[19]</sup> HF types were stratified into  
12  
13 intermediate or reduced left ventricular ejection fraction (LVEF < 49%), preserved  
14  
15 LVEF (LVEF > 50%) and unknown LVEF.  
16  
17

18  
19  
20  
21  
22 We extracted urinary and blood culture information from the microbiology laboratory  
23  
24 database for each febrile episode during hospitalisation. A diagnosis of UTI was  
25  
26 defined as bacterial growth of  $10E^3$  colony-forming units in a urine sample plus the  
27  
28 corresponding symptoms of a UTI.  
29  
30

31  
32  
33  
34 Information on death was obtained from Switzerland's national deaths registry and  
35  
36 Geneva University Hospitals' (the only public hospital in the canton) electronic  
37  
38 databases. We reviewed charts for hospital LOS, place of discharge (home vs  
39  
40 rehabilitation centre or care home), and all-cause and HF-related hospital  
41  
42 readmissions within one year.  
43  
44  
45  
46  
47  
48  
49

## 50 **PATIENT AND PUBLIC INVOLVEMENT**

51  
52 Patients were not involved in the study design or conduct.  
53  
54  
55  
56  
57  
58

## 59 **STATISTICS**

1 For our analyses, timings (day 0) were set from the first day of diuretic use, which could  
2 differ from the hospital admission day.  
3  
4

### 5 6 *Primary analysis and weight evolution* 7

8  
9  
10 Weight loss analyses during diuretic treatment were restricted to patients with volume  
11 overload (Figure S1). The primary analysis used a linear regression model, where the  
12 48 h weight loss was the dependent variable and UC was the independent variable.  
13  
14 The model was adjusted for age, sex, Charlson index score, pre-admission diuretic  
15 dose, HF type, admission heart rate and blood pressure, respiratory failure, weight  
16 excess at diuretic therapy, first diuretic dose, use of continuous intravenous diuretics,  
17 AKI and admission through the emergency room, based on previous studies (Table  
18 S1). [9, 20, 21] To reach non-inferiority, the upper confidence interval of a between-group  
19 difference had to be less than 1 kg (in favour of UC). This threshold was determined  
20 based on daily minimal clinically significant weight loss of 0.5 kg (1 kg in 2 days;  
21 Statistics S1). [22] Unilateral T-test served to test non-inferiority.  
22  
23  
24  
25  
26  
27  
28  
29  
30  
31  
32  
33  
34  
35  
36  
37  
38  
39

40 We performed five sensitivity analyses on the main outcome (Statistics S2). Firstly, a  
41 multiple imputation method was used to replace missing values. The second matched  
42 catheterised patients 1:1 with non-catheterised patients according to sex and the  
43 closest value (< 10%) of a propensity score. The score included all the variables  
44 mentioned above except sex. A paired t-test was used to test mean differences. The  
45 third sensitivity analysis excluded patients with urinary retention. The fourth replaced  
46 AKI at admission with creatininemia and blood sodium. The last sensitivity analysis  
47 split the continuous confounding variables at their median.  
48  
49  
50  
51  
52  
53  
54  
55  
56  
57  
58  
59  
60

1 We used linear regression, adjusted for confounders, to explore associations between  
2 UC and persistent weight excess at 72 h and one week. We also tested the interaction  
3 between UC and time in a mixed-effects model adjusted for the factors mentioned  
4 above. A random intercept for each patient accounted for repeated measures across  
5 days. The mean expected excess weights of patients with and without UC was  
6 calculated assuming mean values for continuous predictors and a proportion of  
7 positive categorical predictors similar to the study sample.  
8  
9  
10  
11  
12  
13  
14  
15  
16  
17  
18  
19  
20

### 21 *Clinical improvements and complications*

22  
23  
24 The unadjusted impact of UC on time-dependent outcomes was analysed using  
25 Kaplan–Meier survival analysis and an unweighted, two-sided, log-rank test to  
26 compare groups. Analysis of target weight was restricted to patients with volume  
27 overload. Analyses of intravenous diuretics, oxygen supply and CPAP were restricted  
28 to patients receiving those therapies. Multivariate Cox models were adjusted for age,  
29 sex and Charlson comorbidity index score. For target weight and the time needed to  
30 discontinue intravenous diuretics, Cox models were further adjusted for all the  
31 confounding factors in the primary analysis. The proportional hazards assumption was  
32 verified using Schoenfeld residuals and a visual inspection of the log-minus-log plots  
33 (Statistics S3).  
34  
35  
36  
37  
38  
39  
40  
41  
42  
43  
44  
45  
46  
47  
48  
49

50 The association between UC and LOS was tested using a linear regression model  
51 adjusted for confounding factors and in which LOS was log-transformed to correct for  
52 skewed data. Logistic regression was used to adjust binary outcomes for  
53 confounders. Comparisons of characteristics between groups were performed using  
54 the chi-squared test or Fisher's exact test, where appropriate, for categorical  
55  
56  
57  
58  
59  
60

1 variables. The Mann–Whitney test was used for continuous variables as these were  
2  
3 not normally distributed. Except for the primary outcomes, all analyses were two-  
4  
5 sided, with a significance level set at 5%. All analyses were performed using STATA,  
6  
7 version 12.0, and R statistical software, Version 4.0.0.<sup>[23]</sup>  
8  
9

## 10 11 12 13 14 15 **RESULTS**

16  
17  
18  
19 Of 640 potential participants in the HF register, 174 had no available paper medical  
20  
21 chart and 7 had had no diuretic therapy within the first 7 days, leaving a cohort of 459  
22  
23 patients of whom 113 underwent UC within the first 24 h (24.6%). Only four of these  
24  
25 patients had documented urinary retention. Catheterised patients were older, more  
26  
27 often women, more frequently experienced respiratory failure or AKI, and received  
28  
29 higher initial diuretic doses (**Table 1**). Urinary catheters were placed for a median of 4  
30  
31 days (IQR: 2–8). Diuresis was recorded more often among patients with UC (58.0%)  
32  
33 than patients without (41.2%,  $p < 0.01$ ).  
34  
35  
36  
37  
38  
39  
40  
41

### 42 **EXCESS WEIGHT UNDER DIURETIC THERAPY**

43  
44  
45 At diuretic therapy initiation, 342 patients carried excess weight and were included in  
46  
47 the primary analysis (Figure S1). In adjusted linear regressions, being catheterised  
48  
49 was not associated with significantly greater 48 h weight loss than not being  
50  
51 catheterised (0.43 Kg in favour of UC (95% CI: -0.03–0.88)). The upper confidence  
52  
53 interval of between-group difference was below the non-inferiority boundary of 1 kg ( $p$   
54  
55  $< 0.01$  for non-inferiority).  
56  
57  
58  
59  
60



1 In sensitivity analysis, the results were in line with the primary analysis (Table S2). In  
2  
3 the propensity score-matched analysis, 64 patients with UC were matched with 64  
4  
5 patients without a catheter (none had urinary retention). The difference in weight loss  
6  
7 was 0.29 kg (95% CI: -0.3–0.88;  $p < 0.01$  for non-inferiority).  
8  
9

10  
11  
12  
13  
14  
15 Patients with UC did not have a statistically lower persistent excess weight at 72 h: the  
16  
17 difference was 0.27 kg (95% CI: -0.52–1.1;  $p = 0.50$ ) in unadjusted and 0.24 kg  
18  
19 (95% CI: -0.17–0.64;  $p < 0.001$  for non-inferiority) in adjusted linear regression. At one  
20  
21 week, the excess weight difference between patients with and without UC was -0.09 kg  
22  
23 (95% CI: -1.0–0.8;  $p = 0.84$ ) in unadjusted and -0.14 kg (95% CI: -0.89–0.60;  $p = 0.01$   
24  
25 for non-inferiority) in adjusted linear regression. Similarly, there was no statistically  
26  
27 significant interaction between UC and daily excess weight changes in the mixed-  
28  
29 effects model ( $p = 0.55$ ; **Figure 1**).  
30  
31  
32  
33  
34  
35  
36  
37

### 38 **CLINICAL IMPROVEMENT**

39  
40  
41 Time to reach target weight and time needed to discontinue CPAP were not statistically  
42  
43 different between patients with and without UC in both unadjusted and adjusted  
44  
45 analysis (**Figure 2, Table 2**). UC tended to be associated with a longer time to  
46  
47 discontinuation of an intravenous diuretic or discontinuation of oxygen supply (**Figure**  
48  
49 **2**), but the associations disappeared after adjustment for confounders (**Table 2**).  
50  
51  
52  
53  
54  
55  
56  
57  
58  
59  
60

1 The median hospital LOS was identical for patients with and without UC (12 days, IQR:  
2 9–18). However, fewer UC patients were discharged directly home from hospital  
3  
4 (57.3% vs 73.7%; adjusted OR 0.6 (95% CI: 0.3–0.9;  $p < 0.01$ )).  
5  
6  
7  
8  
9  
10

## 11 12 **COMPLICATIONS**

13  
14  
15 The proportions of initial treatment failures, low blood pressure episodes and patients  
16 with worsening kidney function were not statistically different between groups (**Table**  
17  
18 **2**).  
19  
20  
21  
22  
23  
24  
25  
26

27 All-cause and HF-related readmissions were not statistically different between patients  
28 with and without UC (**Table 2** and **Figure 3**). Half the patients with UC and one third  
29 without UC were dead at one year. The difference was not statistically significant after  
30 adjustment (**Table 2**).  
31  
32  
33  
34  
35  
36  
37  
38  
39

40 UC patients were at a higher risk of suffering from a UTI, and this association persisted  
41 in adjusted analyses (**Table 2** and **Figure 3**). Multiple UTIs occurred in 9 UC patients  
42 (8.0%) and in 5 patients without UC (1.2%,  $p < 0.01$ ). Patients with a UTI had a longer  
43 hospital LOS (15 days (IQR: 10–21) vs 11 days (IQR: 8–17),  $p < 0.001$ ) and an  
44 increased one-year mortality rate (52.5% vs 34.0%, adjusted HR 1.5; 95% CI: 1.1–2.3;  
45  
46  
47  
48  
49  
50  
51  
52  $p = 0.038$ ).  
53  
54  
55  
56  
57

## 58 **DISCUSSION AND CONCLUSION**

59  
60

1 Among patients admitted to medical wards for acute HF, the strategy of abstaining  
2 from UC did not lead to inferior initial weight loss when compared to the strategy of UC  
3 placement within the first 24 h. Besides, UC had no impact on clinical improvement  
4 such as the time needed to reach target weight, discontinue intravenous diuretics or  
5 improve respiratory failure, and hospital LOS. Furthermore, UC did not prevent  
6 excessive diuresis resulting in low blood pressure episodes or worsening kidney  
7 function, and it was associated with a higher risk of a UTI.  
8  
9  
10  
11  
12  
13  
14  
15  
16  
17  
18  
19  
20

21 There are few appropriate indications for UC,<sup>[14]</sup> and 7% to 50% of UCs are done  
22 outside these indications (Table S3).<sup>[24, 25]</sup> Rates of UC subsequent to HF vary greatly  
23 and could be very high. In one study, more than half of haemodynamically stable  
24 patients underwent UC.<sup>[11]</sup> The rationale for UC in HF is weak yet somehow based on  
25 beliefs that it facilitates urine elimination and increases comfort by decreasing toilet  
26 visits. However, there is good evidence that UC does not increase the comfort of  
27 patients undergoing diuretic therapy, even at high dosages.<sup>[13]</sup> Most guidelines on UC  
28 good practice do not list HF as a standard indication.<sup>[26]</sup> Through their *Choosing Wisely*  
29 campaigns, Swiss and American authorities recommend avoiding in-dwelling UC for  
30 urine output monitoring in stable patients who can void or for patient or staff  
31 convenience.<sup>[27, 28]</sup> Indication lists, authorities' recommendations and financial  
32 penalties have reduced the overall inappropriate use of UC.<sup>[14]</sup> An American study  
33 showed that the proportion of UC among HF patients decreased by 8% between 2009  
34 and 2014.<sup>[10]</sup>  
35  
36  
37  
38  
39  
40  
41  
42  
43  
44  
45  
46  
47  
48  
49  
50  
51  
52  
53  
54  
55  
56  
57  
58  
59  
60

1 Catheter-associated UTIs (CAUTIs) are the second most common infections  
2 associated with patients hospitalised for HF after *Clostridium*-related infections.<sup>[29]</sup>  
3  
4 Previous reports among HF patients found associations between CAUTI and increased  
5  
6 risks of discharge to a skilled care facility, longer hospital LOS, higher total hospital  
7  
8 costs and in-hospital mortality.<sup>[11, 29]</sup> Condom catheters are a better option when  
9  
10 diuresis affects older patients with a disability: they lead to fewer complications,<sup>[30]</sup> are  
11  
12 more comfortable and are less painful than UC.<sup>[13]</sup>  
13  
14  
15  
16  
17  
18  
19  
20

21 The present study is the first to consider association between UC and clinically relevant  
22  
23 outcomes in the context of HF. Using a register and significant adjustments to potential  
24  
25 confounding factors further strengthened our findings. However, the study has  
26  
27 limitations. Firstly, the cohort preceded some important advances in HF management  
28  
29 (e.g.: sacubitril treatment or SGLT2 inhibitors) that may have changed readmission risk  
30  
31 and mortality. Nevertheless, there were no changes in the 2021 ESC guidelines  
32  
33 concerning the management of acute HF using diuretics, or the relevance of UC  
34  
35 insertion in this indication.<sup>[3]</sup> We thus believe that our study's conclusions remain valid  
36  
37 today. Secondly, the study's retrospective, observational approach only allowed us to  
38  
39 hypothesise that urinary catheters were placed for HF management. To minimise these  
40  
41 issues, we only selected UCs which occurred in the first 24 h of diuretic therapy.  
42  
43 Thirdly, since patients are usually not weighed in emergency rooms, we focused on  
44  
45 the weight change from days 1 to day 3. Thus, UC's impact during the first 24 h of  
46  
47 diuretic therapy was not assessed. A randomised prospective design, with protocols to  
48  
49 guide rapid diuretic adaptation, would be better able to explore the UC's real potential  
50  
51 among HF patients. However, considering current evidence and risks, such a study  
52  
53 may never occur. It is of note that records of the amount of urine passed were only  
54  
55  
56  
57  
58  
59  
60

1 available for half of the patients, with or without UC. Thus, checking for adequate  
2  
3 diuresis after treatment with diuretics might be a simpler, safer recommendation than  
4  
5 UC for improved HF management. Finally, some medical charts could not be retrieved,  
6  
7 but their unavailability was random and unrelated to their UC status or outcomes. Thus,  
8  
9 there is little risk that unavailable charts biased the results.  
10  
11  
12  
13  
14  
15  
16

17 In this retrospective study, with no obvious hourly diuresis-based diuretic adjustment  
18  
19 strategy, weight loss without UC was not inferior to weight loss after UC within 24 h of  
20  
21 initiating diuretic treatment. UC had no impact on the clinically relevant outcomes of  
22  
23 time to reach target weight, time to resolve respiratory failure and hospital LOS. The  
24  
25 lack of benefits and the increased risk of a UTI preclude systematic UC for the  
26  
27 management of HF.  
28  
29  
30  
31

## 32 **DATA AVAILABILITY**

33  
34  
35  
36 The database, variable explanation, and Stata do-file (in Word format) are available at  
37  
38 request to gregor.john@rhne.ch.  
39  
40  
41  
42  
43  
44  
45

## 46 **REFERENCES**

- 47  
48 1. Savarese G, Lund LH. Global Public Health Burden of Heart Failure. *Card Fail Rev.* **3**, 7-11 (2017).
- 49  
50 2. Barasa A, Schaufelberger M, Lappas G, Swedberg K, Dellborg M, Rosengren A. Heart failure in young  
51  
52 adults: 20-year trends in hospitalization, aetiology, and case fatality in Sweden. *Eur Heart J.* **35**,  
53  
54 25-32 (2014).  
55  
56  
57  
58  
59  
60

- 1  
2  
3  
4  
5  
6  
7  
8  
9  
10  
11  
12  
13  
14  
15  
16  
17  
18  
19  
20  
21  
22  
23  
24  
25  
26  
27  
28  
29  
30  
31  
32  
33  
34  
35  
36  
37  
38  
39  
40  
41  
42  
43  
44  
45  
46  
47  
48  
49  
50  
51  
52  
53  
54  
55  
56  
57  
58  
59  
60
3. McDonagh TA, Metra M, Adamo M, Gardner RS, Baumbach A, Böhm M, et al. 2021 ESC Guidelines for the diagnosis and treatment of acute and chronic heart failure. *Eur Heart J.* **36**, 3599-726 (2021).
4. Benjamin, E. J. *et al.* Heart Disease and Stroke Statistics-2019 Update: A Report From the American Heart Association. *Circulation.* **139**, e56-e528 (2019).
5. Jessup, M. *et al.* 2009 focused update: ACCF/AHA Guidelines for the Diagnosis and Management of Heart Failure in Adults: a report of the American College of Cardiology Foundation/American Heart Association Task Force on Practice Guidelines: developed in collaboration with the International Society for Heart and Lung Transplantation. *Circulation.* **119**, 1977-2016 (2009).
6. McMurray, J. J. *et al.* ESC Guidelines for the diagnosis and treatment of acute and chronic heart failure 2012: The Task Force for the Diagnosis and Treatment of Acute and Chronic Heart Failure 2012 of the European Society of Cardiology. Developed in collaboration with the Heart Failure Association (HFA) of the ESC. *Eur Heart J.* **33**, 1787-847 (2012).
7. Felker, G. M. *et al.* Diuretic strategies in patients with acute decompensated heart failure. *N Engl J Med.* **364**, 797-805 (2011).
8. Felker, G. M., O'Connor, C. M., Braunwald, E. Loop diuretics in acute decompensated heart failure: necessary? Evil? A necessary evil? *Circ Heart Fail.* **2**, 56-62 (2009).
9. ter Maaten JM, et al. Diuretic response in acute heart failure-an analysis from ASCEND-HF. *Am Heart J.* **170**, 313-21 (2015).
10. Metersky, M. L. *et al.* National trends in the frequency of bladder catheterization and physician-diagnosed catheter-associated urinary tract infections: Results from the Medicare Patient Safety Monitoring System. *Am J Infect Control.* **45**, 901-04 (2017).

- 1 11. Jang, A. Y. *et al.* Routine Indwelling Urethral Catheterization in Acute Heart Failure Patients  
2  
3  
4 Is Associated With Increased Urinary Tract Complications Without Improved Heart  
5  
6 Failure Outcomes. *Circ J.* **82**, 1632-39 (2018).  
7
- 8 12. Aoki, T. Appropriate Use of Urinary Catheter in Acute Heart Failure Patients. *Circ J.* **82**,  
9  
10 1505-06 (2018).  
11
- 12 13. Saint, S. *et al.* Condom versus indwelling urinary catheters: a randomized trial. *J Am Geriatr*  
13  
14 *Soc.* **54**, 1055-61 (2006).  
15
- 16 14. Meddings, J. *et al.* Reducing unnecessary urinary catheter use and other strategies to  
17  
18 prevent catheter-associated urinary tract infection: an integrative review. *BMJ Qual*  
19  
20 *Saf.* **23**, 277-89 (2014).  
21  
22
- 23 15. Hollingsworth, J. M. *et al.* Determining the noninfectious complications of indwelling  
24  
25 urethral catheters: a systematic review and meta-analysis. *Ann Intern Med.* **159**, 401-  
26  
27 10 (2013).  
28  
29
- 30 16. Garin, N. *et al.* Inclusion into a heart failure critical pathway reduces the risk of death or  
31  
32 readmission after hospital discharge. *Eur J Intern Med.* **23**, 760-4 (2012).  
33  
34
- 35 17. Berra, G. *et al.* Outcome in acute heart failure: prognostic value of acute kidney injury and  
36  
37 worsening renal function. *J Card Fail.* **21**, 382-90 (2015).  
38  
39
- 40 18. Anisman SD, Erickson SB, Morden NE. How to prescribe loop diuretics in oedema. *BMJ.*  
41  
42 **364**; l359 (2019).  
43  
44
- 45 19. Sundararajan, V. *et al.* New ICD-10 version of the Charlson comorbidity index predicted in-  
46  
47 hospital mortality. *J Clin Epidemiol.* **57**, 1288-94 (2004).  
48  
49
- 50 20. Shah RV, McNulty S, O'Connor CM, Felker GM, Braunwald E, Givertz MM. Effect of admission oral  
51  
52 diuretic dose on response to continuous versus bolus intravenous diuretics in acute heart  
53  
54 failure: an analysis from diuretic optimization strategies in acute heart failure. *Am Heart J.* **164**,  
55  
56 862-8 (2012).  
57  
58  
59  
60

- 1  
2  
3  
4  
5  
6  
7  
8  
9  
10  
11  
12  
13  
14  
15  
16  
17  
18  
19  
20  
21  
22  
23  
24  
25  
26  
27  
28  
29  
30  
31  
32  
33  
34  
35  
36  
37  
38  
39  
40  
41  
42  
43  
44  
45  
46  
47  
48  
49  
50  
51  
52  
53  
54  
55  
56  
57  
58  
59  
60
21. Voors AA, et al. Diuretic response in patients with acute decompensated heart failure: characteristics and clinical outcome--an analysis from RELAX-AHF. *Eur J Heart Fail*. **16**, 1230-40 (2014).
  22. Ezekowitz JA, O'Meara E, McDonald MA, Abrams H, Chan M, Ducharme A, et al. 2017 Comprehensive Update of the Canadian Cardiovascular Society Guidelines for the Management of Heart Failure. *Can J Cardiol*. **33**, 1342-433 (2017).
  23. R Core Team (2017). R: A language and environment for statistical computing. [program], 2019. R Foundation for Statistical Computing, Vienna, Austria. URL <https://www.R-project.org/>.
  24. Saint, S. *et al*. Are physicians aware of which of their patients have indwelling urinary catheters? *Am J Med*. **109**, 476-80 (2000).
  25. Gokula, R. R., Hickner, J. A., Smith, M. A. Inappropriate use of urinary catheters in elderly patients at a midwestern community teaching hospital. *Am J Infect Control*. **32**, 196-9 (2004).
  26. Centers for Disease Control and Prevention. Examples of Appropriate Indications for Indwelling Urethral Catheter Use. URL: <https://www.cdc.gov/infectioncontrol/guidelines/cauti/recommendations.html> (last access: 09.04.2020)
  27. Physicians ACoE. Choosing Wisely, 2013. URL: <https://www.choosingwisely.org/societies/american-college-of-emergency-physicians/> (last access: 09.04.2020)
  28. Générale SSdmi. Choosing Wisely, 2016. URL: <https://www.smartermedicine.ch/fr/liste-top-5/infektiologie.html#c15766> (last access: 09.04.2020)
  29. Miller, P. E. *et al*. National Trends in Healthcare-Associated Infections for Five Common Cardiovascular Conditions. *Am J Cardiol*. **124**, 1140-48 (2019).



1 30. Saint, S. *et al.* Condom Catheters versus Indwelling Urethral Catheters in Men: A  
2  
3  
4 Prospective, Observational Study. *J Hosp Med.* **14**, E1-E4 (2019).  
5  
6  
7  
8  
9  
10  
11  
12  
13  
14  
15  
16  
17  
18  
19  
20  
21  
22  
23  
24  
25  
26  
27  
28  
29  
30  
31  
32  
33  
34  
35  
36  
37  
38  
39  
40  
41  
42  
43  
44  
45  
46  
47  
48  
49  
50  
51  
52  
53  
54  
55  
56  
57  
58  
59  
60

For peer review only

## ACKNOWLEDGEMENTS

**Contributor:** We gratefully acknowledge Elise Dupuis for her help with the statistical analysis.

**Funders:** The study received a grant from Geneva University Hospitals (grant: PRD 1-2017-I).

## ETHICAL STATEMENT

The institutional review board of Geneva university hospital  
Comission cantonale d'éthique de la recherche (CCER): 08-250R

## AUTHORS CONTRIBUTIONS

**G.J., S.C., N.G., D.C. and J.S.:** planned the study (protocol). **M.A. and G.B.** collected the data. **G.J. and J.S.** performed the analyses. **G.J.** wrote the manuscript. All authors reviewed and approved the final manuscript.

## CONFLICT OF INTEREST STATEMENT

The authors declare no competing interests.

## ABBREVIATIONS

AKI: acute kidney injury

1 CI: confidence interval

2  
3 CPAP: continuous positive airway pressure HF: heart failure

4  
5 HR: hazard ratio

6  
7  
8  
9  
10 KDIGO: Kidney Disease: Improving Global Outcomes

11  
12 LVEF: left ventricular ejection fraction

13  
14 OR: odds ratio

15  
16 UC: urinary catheterisation

17  
18 UTI: urinary tract infection

## 19 20 21 22 23 24 25 **ONLINE SUPPLEMENTS**

26  
27  
28  
29 **Statistic S1:** Choice of non-inferiority boundary and sample size calculation

30  
31 **Statistic S2:** Sensitivity analysis

32  
33 **Statistic S3:** Proportional assumption and test

34  
35  
36 **Table S1:** Choice of adjustment variable

37  
38 **Table S2:** Sensitivity analysis results

39  
40  
41 **Table S3:** List of indications for urinary catheter insertion per the Swiss 'Progress! Safe  
42 urinary catheterization' programme

43  
44  
45 **Figure S1:** Study flow-chart

1  
2  
3  
4 **Figure 1:** Predicted excess weight (kg) over time (days) for patients with (black line) and  
5 without (green line) urinary catheterisation (UC). Mean expected excess weights and their  
6 confidence intervals were calculated using an adjusted mixed-effects model assuming mean  
7 values for continuous predictors and a proportion of positive categorical predictors similar to  
8 the study sample. UC had no statistical effect on excess weight evolution over time ( $p$  for  
9 interaction = 0.55).  
10  
11  
12  
13  
14  
15  
16  
17  
18  
19  
20  
21  
22  
23

24 **Figure 2:** Time to reach clinical improvement for patients with urinary catheterisation (black  
25 line) and controls (green line): (A) time to reach target weight; (B) time to discontinuation of  
26 intravenous diuretics; (C) time to discontinuation of continuous positive airway pressure  
27 therapy; and (D) time to discontinuation of oxygen supply.  
28  
29  
30  
31  
32  
33  
34  
35  
36  
37  
38  
39  
40

41 **Figure 3:** Time to reach unfavourable outcomes for patients with urinary catheterisation (black  
42 line) and controls (green line): (A) time to first urinary tract infection; (B) time to first all-cause  
43 hospital readmission; (C) time to first heart failure-related readmission; and (D) time to death.  
44  
45  
46  
47  
48  
49  
50  
51  
52  
53  
54  
55  
56  
57  
58  
59  
60

**Table 1:** Characteristics of participants with and without urinary catheterisation (UC). Only UC within 24 h of diuretic therapy initiation was considered. Values are numbers (percentage) unless otherwise stated.

| Characteristic                                     | Cohort<br>(N = 459) | With UC<br>(N = 113) | Without UC<br>N = 346) | P value  |
|----------------------------------------------------|---------------------|----------------------|------------------------|----------|
| Age (y), median (IQR)                              | 81 (73–86)          | 83.5 (76–89)         | 80 (71–85)             | < 0.001  |
| Male                                               | 248 (55.2%)         | 52 (47.3%)           | 196 (57.8%)            | 0.053    |
| Admitted through ER                                | 398 (86.7%)         | 97 (85.8%)           | 301 (87.0%)            | 0.754    |
| Night-time admission (19h00–07h00)                 | 169 (36.8%)         | 37 (32.7%)           | 132 (38.1%)            | 0.301    |
| Current smoker                                     | 79 (18.0%)          | 18 (17.3%)           | 61 (18.1%)             | 0.844*   |
| High blood pressure                                | 331 (73.7%)         | 83 (73.7%)           | 248 (73.2%)            | 0.709    |
| Diabetes                                           | 135 (30.1%)         | 34 (30.9%)           | 101 (29.8%)            | 0.812    |
| Myocardial infarct                                 | 27 (6.1%)           | 6 (5.5%)             | 21 (6.3%)              | 0.762*   |
| LVEF<50%                                           | 203 (45.2%)         | 46 (40.7%)           | 157 (45.4%)            | 0.686    |
| Stroke                                             | 52 (11.8%)          | 18 (16.1%)           | 34 (10.2%)             | 0.076*   |
| Peripheral vascular disease                        | 76 (17.2%)          | 23 (21.1%)           | 53 (15.9%)             | 0.242*   |
| Dementia                                           | 30 (6.8%)           | 9 (8.3%)             | 21 (6.3%)              | 0.482*   |
| COPD                                               | 66 (14.7%)          | 16 (14.5%)           | 50 (14.7%)             | 0.958*   |
| Oncological disease                                | 32 (7.2%)           | 8 (7.3%)             | 24 (7.2%)              | 0.963*   |
| Liver disease                                      | 24 (5.4%)           | 7 (6.4%)             | 17 (5.1%)              | 0.598*   |
| CKD                                                |                     |                      |                        |          |
| II                                                 | 174 (38.7%)         | 39 (35.4%)           | 135 (39.2%)            | 0.380    |
| III                                                | 154 (34.4%)         | 40 (36.4%)           | 114 (33.6%)            |          |
| IV                                                 | 22 (4.9%)           | 6 (5.5%)             | 16 (4.7%)              |          |
| V                                                  | 2 (0.5%)            | 0                    | 2 (0.6%)               |          |
| Charlson comorbidity index, median (IQR)           | 3 (1–4)             | 3 (2–4)              | 3 (1–4)                | 0.115    |
| <b>Pre-admission medication</b>                    |                     |                      |                        |          |
| ACE/ARB                                            | 290 (64.6%)         | 65 (59.1%)           | 225 (66.4%)            | 0.165    |
| Beta-blocker                                       | 204 (45.4%)         | 49 (44.5%)           | 155 (45.7%)            | 0.829    |
| Aldosterone inhibitor                              | 62 (13.8%)          | 14 (12.7%)           | 48 (14.2%)             | 0.753*   |
| Diuretics                                          | 239 (52.1%)         | 66 (58.4%)           | 173 (50.0%)            | 0.120    |
| <b>Admission characteristics</b>                   |                     |                      |                        |          |
| Median sodium level (mmol/l) at admission (IQR)    | 137 (134–140)       | 137 (133–139)        | 138 (135–140)          | 0.022    |
| Median NT-proBNP level (ng/l) at admission (IQR)   | 6377 (3069–13254)   | 7700 (4080–16204)    | 6206 (2700–12101)      | 0.124    |
| Median haemoglobin level (g/l) at admission (IQR)  | 123 (109–137)       | 119 (107–133)        | 125 (110–138)          | 0.115    |
| Median creatinin level (mmol/l) at admission (IQR) | 107 (85–148)        | 116 (89–197)         | 104 (83–138)           | 0.005    |
| Heart rate (beat/min), median (IQR)                | 81 (70–94)          | 82.5 (70–91)         | 80 (69.5–95)           | 0.785    |
| Mean blood pressure (mmHg), median (IQR)           | 90 (80–100)         | 88.3 (78.3–100)      | 90 (80.3–100)          | 0.162    |
| AKI                                                |                     |                      |                        |          |
| I                                                  | 143 (31.5%)         | 46 (41.8%)           | 97 (28.6%)             | 0.002*   |
| II                                                 | 24 (5.3%)           | 9 (8.2%)             | 15 (4.4%)              |          |
| III                                                | 5 (1.1%)            | 3 (2.7%)             | 2 (0.6%)               |          |
| Respiratory failure:                               | 371 (80.8%)         | 105 (92.9%)          | 266 (76.9%)            | < 0.001* |
| - Needs oxygen supply                              | 365 (79.5%)         | 104 (92.0%)          | 261 (75.4%)            |          |
| - CPAP                                             | 75 (16.3%)          | 27 (23.9%)           | 48 (13.9%)             |          |
| Volume overload                                    | 342 (74.5%)         | 86 (76.1%)           | 256 (74.0%)            | 0.654    |
| - Target weight (kg), median (IQR)                 | 69.2 (58.1–80.8)    | 70 (58–81.4)         | 68.7 (58.6–80.5)       |          |
| Intravenous therapy                                | 431 (93.9%)         | 108 (95.6%)          | 323 (93.4%)            | 0.391*   |
| Continuous intravenous diuretic therapy            | 42 (9.2%)           | 15 (13.4%)           | 27 (7.8%)              | 0.076*   |

|                                                                                                                                                                                                                                                                                                                                                                                |            |            |            |         |
|--------------------------------------------------------------------------------------------------------------------------------------------------------------------------------------------------------------------------------------------------------------------------------------------------------------------------------------------------------------------------------|------------|------------|------------|---------|
| Initial diuretic doses (mg), median (IQR)                                                                                                                                                                                                                                                                                                                                      | 40 (30–80) | 60 (40–90) | 40 (20–60) | < 0.001 |
| * Fischer test<br>ACE, angiotensin-converting-enzyme inhibitor; AKI, acute kidney injury; ARB, angiotensin receptor blockers; CKD, chronic kidney disease by CKD-EPI classification; COPD, chronic obstructive pulmonary disease; CPAP, continuous positive airway pressure therapy; ER, emergency room; LVEF: left ventricular ejection fraction; UC: urinary catheterisation |            |            |            |         |

For peer review only

**Table 2:** Clinical improvements and adverse outcomes with and without urinary catheterisation. Values are numbers unless otherwise stated.

| <b>Time to clinical improvement</b>                                                                                                                                                                                                                                                                                                                                                                                                                                                                                                                                                                                                                                                                               | <b>With UC</b> | <b>Without UC</b> | <b>HR</b>      | <b>Adjusted HR*</b> |
|-------------------------------------------------------------------------------------------------------------------------------------------------------------------------------------------------------------------------------------------------------------------------------------------------------------------------------------------------------------------------------------------------------------------------------------------------------------------------------------------------------------------------------------------------------------------------------------------------------------------------------------------------------------------------------------------------------------------|----------------|-------------------|----------------|---------------------|
| Time to target weight (d), median (IQR)                                                                                                                                                                                                                                                                                                                                                                                                                                                                                                                                                                                                                                                                           | 6 (3–7)        | 6 (3–7)           | 1.1 (0.8–1.5)  | 1.0 (0.7–1.5)       |
| Time to switch/discontinuation of intravenous diuretics (d), median (IQR)                                                                                                                                                                                                                                                                                                                                                                                                                                                                                                                                                                                                                                         | 4 (2–8)        | 3 (1–6)           | 0.8 (0.7–1.0)  | 0.9 (0.7–1.2)       |
| Time to discontinuation of CPAP (d), median (IQR)                                                                                                                                                                                                                                                                                                                                                                                                                                                                                                                                                                                                                                                                 | 4 (2–6)        | 4 (2–5)           | 1.2 (0.7–2.2)  | 1.1 (0.5–2.4)       |
| Time to discontinuation of oxygen supply (d), median (IQR)                                                                                                                                                                                                                                                                                                                                                                                                                                                                                                                                                                                                                                                        | 4 (2–8)        | 3 (1–7)           | 0.8 (0.6–1.0)  | 0.9 (0.7–1.2)       |
| <b>Time to adverse events</b>                                                                                                                                                                                                                                                                                                                                                                                                                                                                                                                                                                                                                                                                                     | <b>With UC</b> | <b>Without UC</b> | <b>HR</b>      | <b>Adjusted HR†</b> |
| Urinary tract infection, n (%)                                                                                                                                                                                                                                                                                                                                                                                                                                                                                                                                                                                                                                                                                    | 37 (32.7%)     | 46 (13.3%)        | 2.9 (1.8–4.8)‡ | 2.5 (1.5–4.2)‡      |
| One-year all-cause hospital readmission, n (%)                                                                                                                                                                                                                                                                                                                                                                                                                                                                                                                                                                                                                                                                    | 56 (50.9%)     | 193 (56.9%)       | 1.1 (0.8–1.4)  | 1.1 (0.8–1.4)       |
| One-year heart failure-related hospital readmission, n (%)                                                                                                                                                                                                                                                                                                                                                                                                                                                                                                                                                                                                                                                        | 28 (25.5%)     | 91 (26.8%)        | 1.1 (0.7–1.7)  | 1.1 (0.7–1.7)       |
| One-year mortality, n (%)                                                                                                                                                                                                                                                                                                                                                                                                                                                                                                                                                                                                                                                                                         | 51 (50.0%)     | 101 (33.4%)       | 1.7 (1.2–2.4)‡ | 1.4 (1.0–2.1)       |
| <b>Other secondary outcomes</b>                                                                                                                                                                                                                                                                                                                                                                                                                                                                                                                                                                                                                                                                                   | <b>With UC</b> | <b>Without UC</b> | <b>OR</b>      | <b>Adjusted OR†</b> |
| Initial treatment failure                                                                                                                                                                                                                                                                                                                                                                                                                                                                                                                                                                                                                                                                                         | 23 (26.7%)     | 78 (30.5%)        | 0.8 (0.5–1.4)  | 0.8 (0.4–1.4)       |
| Low blood pressure episode                                                                                                                                                                                                                                                                                                                                                                                                                                                                                                                                                                                                                                                                                        | 49 (43.7%)     | 154 (44.6%)       | 1.0 (0.6–1.5)  | 1.1 (0.7–1.7)       |
| - Need of saline perfusion                                                                                                                                                                                                                                                                                                                                                                                                                                                                                                                                                                                                                                                                                        | 24/49 (49.0)   | 67/154 (43.5)     |                |                     |
| Worsening of renal function                                                                                                                                                                                                                                                                                                                                                                                                                                                                                                                                                                                                                                                                                       |                |                   |                |                     |
| 0                                                                                                                                                                                                                                                                                                                                                                                                                                                                                                                                                                                                                                                                                                                 | 82 (74.6%)     | 260 (76.7%)       | 1.1 (0.7–1.8)¶ | 1.1 (0.7–1.8)¶      |
| 1                                                                                                                                                                                                                                                                                                                                                                                                                                                                                                                                                                                                                                                                                                                 | 27 (24.6%)     | 73 (21.5%)        |                |                     |
| 2                                                                                                                                                                                                                                                                                                                                                                                                                                                                                                                                                                                                                                                                                                                 | 1 (-)          | 6 (1.8%)          |                |                     |
| <p>* Models were adjusted for age (continuous), sex (binary), Charlson index score (continuous), pre-admission diuretic dose (continuous), HF type (categorical), admission heart rate and blood pressure (continuous), respiratory failure (binary), weight excess at diuretic therapy (continuous), first diuretic dose (continuous), use of continuous intravenous diuretics (binary), AKI (categorical) and admission through the emergency room (binary); † Models were adjusted for age (continuous), sex (binary), Charlson index score (continuous); ‡ p value &lt; 0.05; ¶ OR of changing to a worse category;</p> <p>CPAP, continuous positive airway pressure therapy; UC, urinary catheterisation</p> |                |                   |                |                     |

1  
2  
3  
4  
5  
6  
7  
8  
9  
10  
11  
12  
13  
14  
15  
16  
17  
18  
19  
20  
21  
22  
23  
24  
25  
26  
27  
28  
29  
30  
31  
32  
33  
34  
35  
36  
37  
38  
39  
40  
41  
42  
43  
44  
45  
46  
47  
48  
49  
50  
51  
52  
53  
54  
55  
56  
57  
58  
59  
60

For peer review only



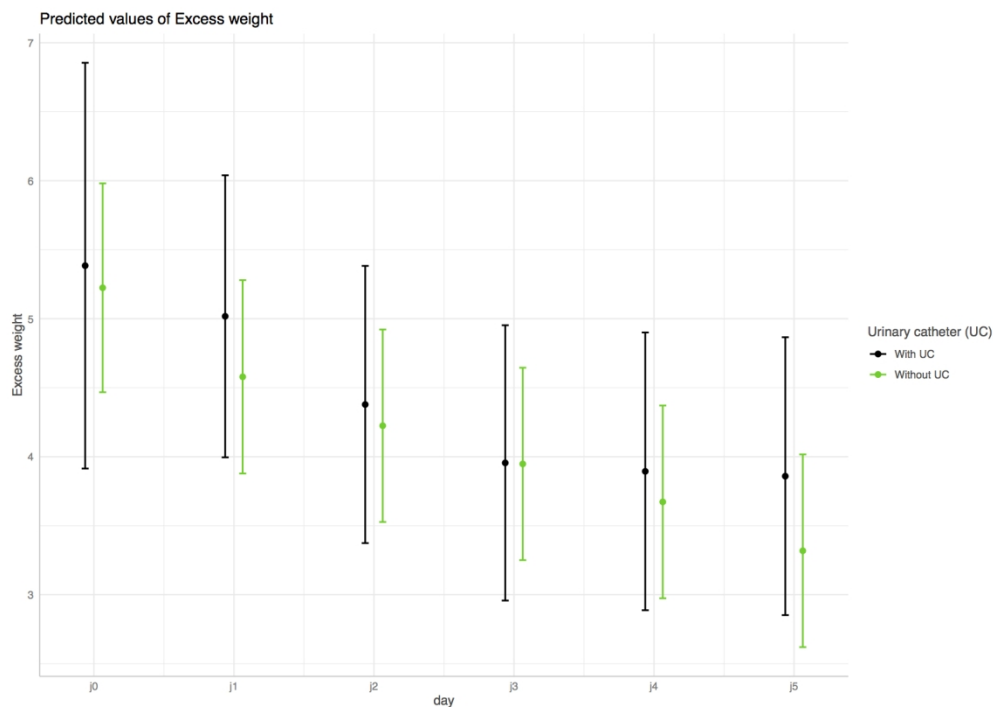

Predicted excess weight (kg) over time (days) for patients with (black line) and without (green line) urinary catheterisation (UC). Mean expected excess weights and their confidence intervals were calculated using an adjusted mixed-effects model assuming mean values for continuous predictors and a proportion of positive categorical predictors similar to the study sample. UC had no statistical effect on excess weight evolution over time ( $p$  for interaction = 0.55).

296x209mm (150 x 150 DPI)



Time to reach clinical improvement for patients with urinary catheterisation (black line) and controls (green line): (A) time to reach target weight; (B) time to discontinuation of intravenous diuretics; (C) time to discontinuation of continuous positive airway pressure supply; and (D) time to discontinuation of oxygen supply.

244x178mm (72 x 72 DPI)

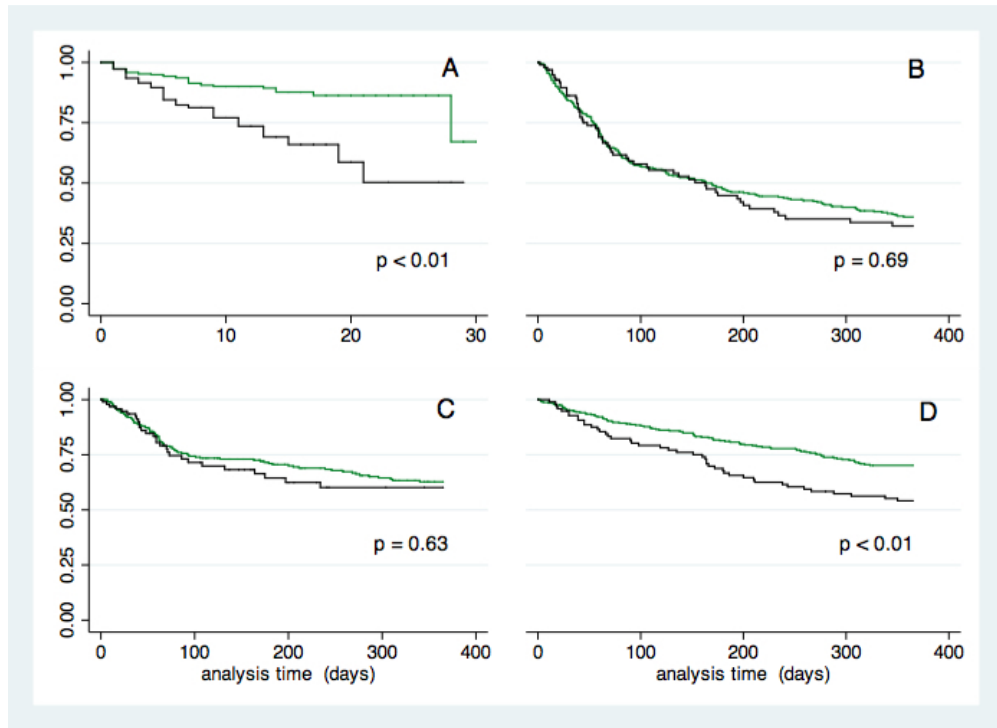

Time to reach unfavourable outcomes for patients with urinary catheterisation (black line) and controls (green line): (A) time to first urinary tract infection; (B) time to first all-cause hospital readmission; (C) time to first heart failure-related readmission; and (D) time to death.

244x178mm (72 x 72 DPI)

Risks and benefits of urinary catheterisation during inpatient diuretic therapy for acute heart failure: A retrospective, non-inferiority, cohort study

G John, M Arcens, G Berra, N Garin, D Carballo, S Carballo, J Stirnemann

## Supplemental Materials

|                                                                                                                                                                           |        |
|---------------------------------------------------------------------------------------------------------------------------------------------------------------------------|--------|
| <b>Statistic S1:</b> Choice of non-inferiority boundary and sample size calculation                                                                                       | p 2    |
| <b>Table S1:</b> Choice of adjustment variable                                                                                                                            | p 3-4  |
| <b>Statistic S2:</b> Sensitivity analysis                                                                                                                                 | p 5    |
| <b>Table S2:</b> Sensitivity analysis results                                                                                                                             | p 6    |
| <b>Figure S1:</b> Study flow-chart                                                                                                                                        | p 7    |
| <b>Table S3:</b> List of indications for urinary catheter insertion per the Swiss 'Progress! Safe urinary catheterization' programme                                      | p 8    |
| <b>Statistic S3:</b> Proportional assumption and test                                                                                                                     | p 9-18 |
| <i>Table S4:</i> Schoenfeld residuals test in multivariable Cox regression                                                                                                | p 8    |
| <i>Table S5:</i> Sensitive analysis for the model on time to reach target weight and CPAP, including time-varying covariates.                                             | p 9    |
| <i>Figure S2:</i> Proportional hazard assumption and analysis                                                                                                             | p 11   |
| <i>Figure S3:</i> Schoenfeld residuals plots over Time for urinary catheterisation (UC) and covariates in the model for time to reach target weight                       | p 12   |
| <i>Figure S4:</i> Schoenfeld residuals plots over Time for urinary catheterisation (UC) and covariates in the model for time to discontinue intravenous diuretic therapy. | p 13   |
| <i>Figure S5:</i> Schoenfeld residuals plots over Time for urinary catheterisation (UC) and covariates in the model for time to discontinue CPAP                          | p 14   |
| <i>Figure S6:</i> Schoenfeld residuals plots over Time for urinary catheterisation (UC) and covariates in the model for time until oxygen supply discontinuation          | p 15   |
| <i>Figure S7:</i> Schoenfeld residuals plots over Time for urinary catheterisation (UC) and covariates in the model for time to death                                     | p 16   |
| <i>Figure S8:</i> Schoenfeld residuals plots over Time for urinary catheterisation (UC) and covariates in the model for time to first urinary tract infection.            | p 16   |
| <i>Figure S9:</i> Schoenfeld residuals plots over Time for urinary catheterisation (UC) and covariates in the model for time to first hospital readmission                | p 17   |
| <b>References</b>                                                                                                                                                         | p 19   |

**Statistic S1:** Choice of non-inferiority boundary and sample size calculation

The non-inferiority cut-off was based on daily minimal weight loss under diuretic therapy of 500 grams (=1Kg in 2 days), acknowledge by guidelines on HF management.<sup>[1]</sup> Thus, a therapy achieving less than this target of weight loss would be considerate to have no or only minimal effect and would be increased (or changed). Similarly, two treatments resulting in weight loss difference under this minimal daily significant weight loss would be considerate to have “no clinically relevant difference”.

The sample size was calculated based on an expected mean weight loss during the first days of 4.2 litters (SD 3.2) under diuretic therapy <sup>[2]</sup>, and a clinically relevant difference of 1 litter between groups (for the UC group). This resulted in 376 patients (one third with an UC) needed to demonstrate non-inferiority with a one-sided significant level of 0.05 and a power of 90%.

For peer review only

**Table S1:** The variables associated with diuretics effectiveness in three studies (ASCEND-HF; RELAX-AHF; DOSE-AHF) compared to the variables included as adjustments in the multivariable models of our study.

| Factors                    |                              | Studies                               |                                |                                              |                                                                         |
|----------------------------|------------------------------|---------------------------------------|--------------------------------|----------------------------------------------|-------------------------------------------------------------------------|
| Category                   | Variable                     | ASCEND-HF [6]                         | RELAX-AHF [7]                  | DOSE-AHF [8]                                 | Our study <sup>1</sup>                                                  |
| Diuretics                  | Home loop diuretics          | Home loop diuretics (chronic use) use | -                              | Home loop diuretics (dose)                   | Home loop diuretics (dose) use                                          |
|                            | Continuous vs intermittent   | -                                     | -                              | Type of therapy (continuous vs intermittent) | Type of therapy (continuous vs intermittent)                            |
|                            | Initial IV diuretic dose     | Loop diuretic                         | -                              | Initial IV diuretic dose                     | Initial IV diuretic dose                                                |
|                            | Bumetanide use               | Bumetanide use                        | -                              | -                                            | NA <sup>2</sup>                                                         |
| General characteristics    | Sex                          | Female sex                            | -                              | -                                            | Female sex                                                              |
|                            | Age                          | -                                     | -                              | -                                            | Age                                                                     |
|                            | Ethnicity                    | Ethnicity                             | Ethnicity                      | -                                            | NA <sup>3</sup>                                                         |
| Weight and oedema          | Oedema                       | Oedema                                | Oedema                         | -                                            | NA <sup>4</sup>                                                         |
|                            | Baseline weight              | Baseline weight                       | Baseline weight                | Baseline weight                              | Baseline weight                                                         |
| Vital signs/ Haemodynamics | Blood pressure               | Systolic and diastolic blood pressure | Diastolic blood pressure       | -                                            | Systolic blood pressure                                                 |
|                            | Heart rate                   | -                                     | -                              | -                                            | Heart rate                                                              |
|                            | Body temperature             | -                                     | Body temperature               | -                                            | NA                                                                      |
|                            | Respiratory rate             | -                                     | Respiratory rate               | -                                            | Respiratory failure (hypoxemia and/or non-invasive respiratory therapy) |
| Heart failure severity     | Dyspnoea                     | Orthopnoea                            | Dyspnoea                       | -                                            | (hypoxemia and/or non-invasive respiratory therapy)                     |
|                            | HF hospitalisation last year | -                                     | HF hospitalisation last year   | -                                            | NA                                                                      |
|                            | NT-proBNP                    | -                                     | NT-proBNP (median vs < median) | -                                            | Not included                                                            |
|                            | LVEF                         | -                                     | LVEF (no effect)               | -                                            | LVEF (> 50% vs < 50% vs unknown)                                        |
|                            | Mode of hospital admission   | -                                     | -                              | -                                            | Admission through ER                                                    |
|                            | Diabetes                     | Diabetes                              | -                              | -                                            | Charlson comorbidities index                                            |

1  
2  
3  
4  
5  
6  
7  
8  
9  
10  
11  
12  
13  
14  
15  
16  
17  
18  
19  
20  
21  
22  
23  
24  
25  
26  
27  
28  
29  
30  
31  
32  
33  
34  
35  
36  
37  
38  
39  
40  
41  
42  
43  
44  
45  
46

|                                                                                                                                                                                                                                                                                                                                                                                                                                                                                                                                                                                                                                                                                                                                                                                                                                                                                                                                                                                                                                                                                                                                                                                                                                          |                              |                                       |                              |                                       |                                                |
|------------------------------------------------------------------------------------------------------------------------------------------------------------------------------------------------------------------------------------------------------------------------------------------------------------------------------------------------------------------------------------------------------------------------------------------------------------------------------------------------------------------------------------------------------------------------------------------------------------------------------------------------------------------------------------------------------------------------------------------------------------------------------------------------------------------------------------------------------------------------------------------------------------------------------------------------------------------------------------------------------------------------------------------------------------------------------------------------------------------------------------------------------------------------------------------------------------------------------------------|------------------------------|---------------------------------------|------------------------------|---------------------------------------|------------------------------------------------|
| <b>Comorbid conditions</b>                                                                                                                                                                                                                                                                                                                                                                                                                                                                                                                                                                                                                                                                                                                                                                                                                                                                                                                                                                                                                                                                                                                                                                                                               | Hyperlipidaemia              | Hyperlipidaemia                       | -                            | -                                     |                                                |
|                                                                                                                                                                                                                                                                                                                                                                                                                                                                                                                                                                                                                                                                                                                                                                                                                                                                                                                                                                                                                                                                                                                                                                                                                                          | Atrial Fibrillation          | -                                     | Atrial Fibrillation          | -                                     |                                                |
|                                                                                                                                                                                                                                                                                                                                                                                                                                                                                                                                                                                                                                                                                                                                                                                                                                                                                                                                                                                                                                                                                                                                                                                                                                          | Percutaneous intervention    | -                                     | Percutaneous intervention    | -                                     |                                                |
|                                                                                                                                                                                                                                                                                                                                                                                                                                                                                                                                                                                                                                                                                                                                                                                                                                                                                                                                                                                                                                                                                                                                                                                                                                          | Hyperthyroid                 | -                                     | Hyperthyroid                 | -                                     |                                                |
| <b>Laboratory</b>                                                                                                                                                                                                                                                                                                                                                                                                                                                                                                                                                                                                                                                                                                                                                                                                                                                                                                                                                                                                                                                                                                                                                                                                                        | Renal function               | baseline (at admission) creatininemia | BUN                          | baseline (at admission) creatininemia | Grade of acute renal injury at admission (0–3) |
|                                                                                                                                                                                                                                                                                                                                                                                                                                                                                                                                                                                                                                                                                                                                                                                                                                                                                                                                                                                                                                                                                                                                                                                                                                          | Baseline potassium           | Baseline potassium                    | Baseline potassium           | -                                     | NA                                             |
|                                                                                                                                                                                                                                                                                                                                                                                                                                                                                                                                                                                                                                                                                                                                                                                                                                                                                                                                                                                                                                                                                                                                                                                                                                          | Baseline sodium at admission | Baseline sodium at admission          | Baseline sodium at admission | -                                     | Not included                                   |
|                                                                                                                                                                                                                                                                                                                                                                                                                                                                                                                                                                                                                                                                                                                                                                                                                                                                                                                                                                                                                                                                                                                                                                                                                                          | Uric acid                    | -                                     | Uric acid                    | -                                     | NA                                             |
|                                                                                                                                                                                                                                                                                                                                                                                                                                                                                                                                                                                                                                                                                                                                                                                                                                                                                                                                                                                                                                                                                                                                                                                                                                          | Aspartate aminotransferase   | -                                     | Aspartate aminotransferase   | -                                     | NA                                             |
|                                                                                                                                                                                                                                                                                                                                                                                                                                                                                                                                                                                                                                                                                                                                                                                                                                                                                                                                                                                                                                                                                                                                                                                                                                          | Total protein (g/l)          | -                                     | Total protein (g/l)          | -                                     | NA                                             |
| <p><b>1)</b> The model was adjusted for age (continuous), sex (binary), Charlson index score (continuous), pre-admission diuretic dose (continuous), HF type (categorical), admission heart rate and blood pressure (continuous), respiratory failure (binary), weight excess at diuretic therapy (continuous), first diuretic dose (continuous), use of continuous intravenous diuretics (binary), AKI (categorical) and admission through the emergency room (binary). Adjustment factors were chosen based on clinical expertise. To reach non-inferiority, the upper confidence interval of a between-group difference had to be less than 1 kg (in favour of UC). Unilateral T-test served to test non-inferiority; <b>2)</b> No Bumetanide use during the study; <b>3)</b> Database did not collect ethnicity; proportion of patients of African or Asian origin is relatively small in Geneva, most being Caucasian; <b>4)</b> Although the presence of oedema was not collected in the database, the analysis of diuretic responsiveness was restricted to patients with weight excess (compared to their target weight) and thus most of them would have had oedema.<br/> NA: not assessed (not collected during the study)</p> |                              |                                       |                              |                                       |                                                |

1  
2  
3 **Statistic S2:** Sensitive analyses:  
4

5 We performed several sensitivity analyses for the main outcome. Firstly, multiple imputation method  
6 was used to replace missing values. Missing data, which were all 5% or less, were inspected to ensure  
7 that the missing at random assumption was reasonable. Imputation involved all baseline responders  
8 and utilised the variables in the adjusted models. Missing data were imputed using chained equations.  
9 Twenty imputed datasets were generated and parameter estimates were combined using Rubin's  
10 rules. The second sensitivity analysis excluded patients with urinary retention. The third matched  
11 catheterised patients 1:1 to non-catheterised patients according to sex and the closest value (< 10%)  
12 of a propensity score. The score included all the variables mentioned above except sex. A paired t-test  
13 was used to test mean differences.  
14  
15

16 The fourth replaced AKI at admission by creatininemia and blood sodium. In the last analysis the  
17 continuous confounding variables were split in the median (results in **Table S2**).  
18  
19

20  
21 It could be hypothesized that the "no difference" observed in the time to reach target weight could  
22 come from a wrong estimation of the weight to "target". Patients could die before to reach their  
23 "true" target weight, and the lowest weight (close to death) would be retained as the "study target  
24 weight". We decided to add a sensitive analysis, excluding patients that died within the first week of  
25 hospital admission, or patients that attain the target weight less than 5 days before to die (16  
26 patients in total). The results of this sensitive analysis was in line with the main result: adjusted HR for  
27 time to reach target weight was 0.97 (95%CI: 0.64-1.44, p=0.87).  
28  
29  
30

31  
32 For readmission and mortality, we performed one sensitivity analysis adding haemoglobin and  
33 natremia at admission, chronic renal function, LVEF, and systolic blood pressur to age, comorbidities  
34 and sex. [3,4] The adjusted hazard ratios for one-year readmission and one-year mortality were 1.02  
35 (95% CI: 0.65–1.61; p = 0.93) and 1.27 (95% CI: 0.87–1.86; p = 0.22), respectively. The difference was  
36 not statistically significant and comforted the analyses in the main manuscript.  
37  
38  
39  
40  
41  
42  
43  
44  
45  
46  
47  
48  
49  
50  
51  
52  
53  
54  
55  
56  
57  
58  
59  
60



**Table S2:** Sensitive analysis for the main outcome. Numbers are coefficient of the linear regression (95%CI).

|                                         | Model 1               | Model 2               | Model 3            | Model 4                 | Model 5               |
|-----------------------------------------|-----------------------|-----------------------|--------------------|-------------------------|-----------------------|
| Urinary catheter                        | 0.43 (-0.03-0.88)*    | 0.42 (-0.04-0.88)*    | 0.43 (-0.03-0.87)* | 0.38 (-0.08-0.83)*      | 0.36 (-0.08-0.80)*    |
| age                                     | -0.01 (-0.02-0.01)    | -0.06 (-0.02-0.01)    | -0.23 (-0.60-0.15) | -0.05 (-0.02-0.01)      | -0.01 (-0.02-0.01)    |
| sex                                     | -0.32 (-0.73-0.08)    | -0.32 (-0.73-0.08)    | -0.35 (-0.76-0.07) | -0.39 (-0.81-0.02)      | -0.35 (-0.74-0.03)    |
| Charlson index                          | 0.04 (-0.07-0.14)     | 0.04 (-0.06-0.14)     | -0.01 (-0.41-0.38) | 0.04 (-0.07-0.14)       | 0.02 (-0.08-0.12)     |
| Chronic diuretic dose                   | -0.003 (-0.008-0.003) | -0.002 (-0.008-0.003) | 0.16 (-0.22-0.55)  | -0.002 (-0.007-0.004)   | -0.003 (-0.007-0.003) |
| LVEF<50% (vs LVEF>50%)                  | -0.32 (-0.76-0.11)    | -0.31 (-0.75-0.13)    | -0.29 (-0.73-0.15) | -0.33 (-0.77-0.11)      | -0.31 (-0.73-0.11)    |
| Unassessed FEVG                         | -0.23 (-0.67-0.29)    | -0.25 (-0.75-0.25)    | -0.26 (-0.76-0.24) | -0.27 (-0.76-0.23)      | -0.25 (-0.74-0.23)    |
| admission heart rate                    | 0.005 (-0.005-0.015)  | 0.005 (-0.005-0.015)  | 0.10 (-0.28-0.48)  | 0.004 (-0.006-0.014)    | 0.005 (-0.005-0.015)  |
| Systolic blood pressure                 | 0.006 (-0.002-0.015)  | 0.006 (-0.002-0.015)  | 0.09 (-0.28-0.45)  | 0.007 (-0.001-0.016)    | 0.005 (-0.004-0.013)  |
| respiratory failure                     | -0.19 (-0.67-0.29)    | -0.19 (-0.67-0.29)    | -0.12 (-0.60-0.37) | -0.19 (-0.67-0.30)      | -0.12 (-0.58-0.35)    |
| weight excess at diuretic therapy       | 0.18 (0.12-0.24)      | 0.18 (0.12-0.24)      | 1.09 (0.71-1.47)   | 0.18 (0.12-0.24)        | 0.18 (0.12-0.23)      |
| first diuretic dose                     | 0.001 (-0.004-0.004)  | 0.001 (-0.004-0.004)  | -0.18 (-0.62-0.25) | 0.001 (-0.003-0.005)    | 0.001 (-0.003-0.004)  |
| use of continuous intravenous diuretics | 0.20 (-0.41-0.80)     | 0.19 (-0.41-0.79)     | 0.16 (-0.45-0.77)  | 0.05 (-0.55-0.64)       | 0.09 (-0.48-0.68)     |
| AKI 1                                   | -0.51 (-0.91-0.10)    | -0.55 (-0.95-0.14)    | -0.59 (-0.99-0.18) | -                       | -0.50 (-0.89-0.11)    |
| AKI 2                                   | -0.83 (-1.76-0.09)    | -0.85 (-1.77-0.08)    | -0.82 (-1.72-0.07) | -                       | -0.69 (-1.62-0.23)    |
| AKI 3                                   | -1.40 (-3.0-0.22)     | -0.74 (-2.6-1.09)     | -1.20 (-2.83-0.42) | -                       | -1.35 (-2.9-0.20)     |
| admission through the emergency room    | -0.02 (-0.58-0.54)    | -0.001 (-0.56-0.56)   | 0.16 (-0.39-0.71)  | -0.08 (-0.64-0.48)      | 0.02 (-0.51-0.56)     |
| Admission blood sodium                  | -                     | -                     | -                  | -0.03 (-0.01-0.06)      | -                     |
| Admission creatininemia                 | -                     | -                     | -                  | -0.003 (-0.005--0.0005) | -                     |

\*p value for non-inferiority <0.05

**Model 1:** main analysis diuretic chronic dose, diuretic first admission dose, age, Charlson index, systolic blood pressure, heart rate, weight excess at diuretic therapy as continuous variables in the model; **Model 2:** same as Model 1, but excluding the patients with urinary retention; **Model 3:** Continuous variables dichotomized (less vs mediane or more); **Model 4:** same as Model 1 but, admission blood sodium (continuous) and creatininemia (continuous) instead of AKI; **Model 5:** same as Model 1 but with multiple imputation of missing values.

AKI: acute kidney injury; LVEF: Left ventricular ejection fraction

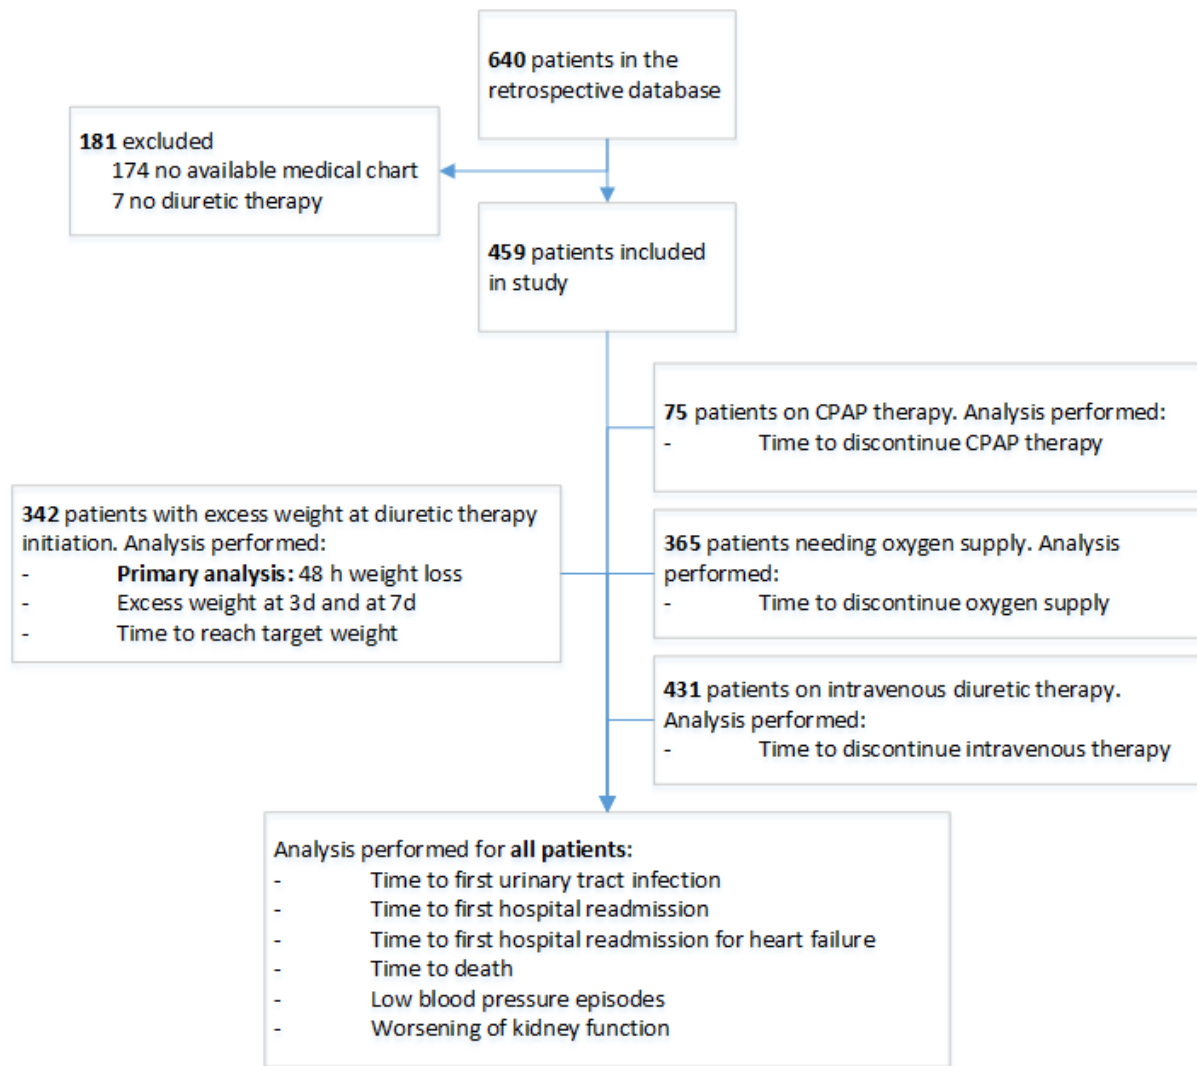

**Figure S1:** Study flow-chart. D=days; H = hours; CPAP= continuous positive pressure

**Table S3:** List of indications for urinary catheter insertion per the Swiss 'Progress! Safe urinary catheterization' programme, adapted with permission from A. Schweiger et al. / Journal of Hospital Infection 106 (2020) 364e371 [9]

| Indication                                | Specification                                                                                                                                                                                                                                                                                                                  | Examples                                                                                                                                                                                                                                                                                                       |
|-------------------------------------------|--------------------------------------------------------------------------------------------------------------------------------------------------------------------------------------------------------------------------------------------------------------------------------------------------------------------------------|----------------------------------------------------------------------------------------------------------------------------------------------------------------------------------------------------------------------------------------------------------------------------------------------------------------|
| Urinary retention                         | <ul style="list-style-type: none"> <li>_ Acute urinary retention regardless of aetiology</li> <li>_ Symptomatic chronic outlet obstruction plus &gt;300 mL residual urine</li> </ul>                                                                                                                                           | <ul style="list-style-type: none"> <li>_ Benign hyperplasia of prostate gland, urethral strictures, bladderstones</li> <li>_ Drug induced (anticholinergics, opioids, antidepressants)</li> </ul>                                                                                                              |
| Measurement of urine volume/fluid balance | <ul style="list-style-type: none"> <li>_ At regular intervals (hourly or as defined by hospitals) plus direct consequence on treatment of patients</li> <li>_ Fluid balance if patient weight not measurable on a daily basis</li> </ul>                                                                                       | <ul style="list-style-type: none"> <li>_ Haemodynamic instability, severe rhabdomyolysis</li> <li>_ Coma, sedated and ventilated patient</li> </ul>                                                                                                                                                            |
| Surgery                                   | <ul style="list-style-type: none"> <li>_ Long surgery (&gt;4 h)</li> <li>_ Peri-interventional: need for empty bladder during surgery, removal of catheter after surgery necessary if no other indication present</li> <li>_ Surgery in urogenital or pelvic floor region</li> <li>_ Epidural/peridural anaesthesia</li> </ul> |                                                                                                                                                                                                                                                                                                                |
| Pressure ulcers plus urinary incontinence | <ul style="list-style-type: none"> <li>_ Stage III or IV pressure ulcers or skin transplants in sacral/ perineal region plus urinary incontinence after exhaustion of alternative strategies for urinary management</li> </ul>                                                                                                 |                                                                                                                                                                                                                                                                                                                |
| Prolonged immobilization                  | <ul style="list-style-type: none"> <li>_ Immobilization for medical reasons, especially for pain management, after exhaustion of alternative strategies for urinary management</li> </ul>                                                                                                                                      | <ul style="list-style-type: none"> <li>_ Acute fractures with severe pain due to patient movement (pelvic fractures, fracture of the neck of the femur)</li> <li>_ Haemodynamic instability possibly caused by movement of the patient</li> <li>_ Transient immobility after specific interventions</li> </ul> |
| Palliative care plus comfort              | <ul style="list-style-type: none"> <li>_ Palliative care plus abnormal bladder function plus/or inability for regular voiding after exhaustion of alternative strategies for urinary management</li> <li>_ High burden of suffering plus wish of informed patient (or relatives)</li> </ul>                                    |                                                                                                                                                                                                                                                                                                                |

1  
2  
3 **Statistic S3:** Proportional hazard assumption for univariate and multivariate models:  
4

5 The log-minus-log plots are shown in the *Figure S2* for all the **univariate association** between “urinary  
6 catheter” and time to event analyses (target weight, discontinuation of intravenous diuretic therapy,  
7 discontinuous of CPAP therapy, discontinuation of oxygen supply, time to hospital readmission, time  
8 to first urinary tract infection, and time to death. We also performed the Schoenfeld residuals test and  
9 tested the interaction between “urinary catheter” and Time in a time-varying covariate cox model. For  
10 both test, proportional assumption is plausible when the p value is more than 0.05. We added the  
11 results of the test in each individual graphs. Based on the three tests, proportional assumption  
12 seemed to be reasonable for all the univariate cox regressions.  
13

14  
15 The slopes of the Schoenfeld residuals and p values of all covariates for the seven models can be  
16 found in *Table S4*. For the test, a p value of <0.05 excludes proportional hazard assumption. Because  
17 appreciation of the proportional assumption on the test only can be difficult, we also provided  
18 Schoenfeld residuals plots with their fitted line for all the models, and all the covariates (*Figure S3-9*).  
19

20  
21 Urinary catheter showed proportional hazard in all the **multivariable models**. However, in the model  
22 on time to target-weight, three covariates violated the proportional hazard assumption (weight excess  
23 at beginning of diuretic therapy, reduced left ventricular ejection fraction, and continuous intravenous  
24 therapy). Since, these variables were only used for adjustment, and the association between main  
25 variable (urinary catheter and time to reach target weight) were not statistically significant in  
26 unadjusted and adjusted analysis, we left these adjusting variables unchanged in the model assuming  
27 a mean effect over time of these variables as proposed by Allison.<sup>[5]</sup> Nevertheless, we also performed  
28 a sensitivity analysis taking into account the time variation effect of the 3 variables in a time-varying  
29 covariates Cox model, (tvc option in Stata). The model confirmed the interaction between the three  
30 covariates and time ( $p < 0.05$ ), but did not change the effect of Urinary catheter on the outcome  
31 (*Table S5*).  
32

33  
34 For the “time to discontinue CPAP therapy” model, Charlson comorbid index score violated the  
35 proportional hazard. In the time-dependant covariate model, the interaction term (time\*CCI), was not  
36 statistically significant (*Table S5*).  
37  
38  
39  
40  
41  
42  
43  
44  
45  
46  
47  
48  
49  
50  
51  
52  
53  
54  
55  
56  
57  
58  
59  
60

1  
2  
3  
4  
5  
6  
7  
8  
9  
10  
11  
12  
13  
14  
15  
16  
17  
18  
19  
20  
21  
22  
23  
24  
25  
26  
27  
28  
29  
30  
31  
32  
33  
34  
35  
36  
37  
38  
39  
40  
41  
42  
43  
44  
45  
46

*Table S4: Proportional-hazards assumption based on Schoenfeld residuals (P value of the phtest in Stata,) and slop of the regression line (rho).*

|                                         | Target weight |         | I.V. diuretics |         | CPAP  |         | Oxygen |         | UTI   |         | Readmission |         | Death |         |
|-----------------------------------------|---------------|---------|----------------|---------|-------|---------|--------|---------|-------|---------|-------------|---------|-------|---------|
|                                         | rho           | P value | rho            | P value | rho   | P value | rho    | P value | rho   | P value | rho         | P value | rho   | P value |
|                                         | 0.06          | 0.43    | 0.01           | 0.77    | 0.17  | 0.25    | 0.02   | 0.68    | 0.04  | 0.73    | 0.02        | 0.70    | -0.02 | 0.85    |
| Urinary catheter                        | 0.04          | 0.57    | 0.02           | 0.60    | 0.14  | 0.28    | -0.002 | 0.97    | 0.09  | 0.44    | 0.02        | 0.69    | -0.01 | 0.87    |
| age                                     | 0.01          | 0.87    | 0.01           | 0.86    | -0.16 | 0.27    | 0.04   | 0.45    | -0.01 | 0.92    | 0.11        | 0.08    | -0.08 | 0.31    |
| sex                                     | -0.04         | 0.57    | -0.02          | 0.63    | -0.15 | 0.28    | -0.06  | 0.28    | -0.24 | 0.05    | -0.12       | 0.07    | 0.09  | 0.25    |
| Charlson index                          | 0.11          | 0.12    | 0.06           | 0.19    | -0.41 | 0.01*   | -0.02  | 0.69    | -0.09 | 0.43    | 0.001       | 0.98    | 0.07  | 0.46    |
| Chronic diuretic dose                   | -0.11         | 0.16    | 0.03           | 0.41    | 0.17  | 0.32    | -0.04  | 0.34    | -     | -       | -           | -       | -     | -       |
| LVEF<50% (vs LVEF>50%)                  | -0.16         | 0.02*   | 0.02           | 0.71    | 0.07  | 0.62    | 0.03   | 0.63    | -     | -       | -           | -       | -     | -       |
| Unassessed LVEF                         | -0.005        | 0.94    | 0.02           | 0.66    | 0.05  | 0.73    | 0.03   | 0.65    | -     | -       | -           | -       | -     | -       |
| admission heart rate                    | 0.05          | 0.49    | 0.02           | 0.73    | -0.17 | 0.23    | 0.003  | 0.34    | -     | -       | -           | -       | -     | -       |
| Systolic blood pressure                 | 0.01          | 0.87    | 0.10           | 0.05    | 0.26  | 0.06    | 0.06   | 0.95    | -     | -       | -           | -       | -     | -       |
| respiratory failure                     | -0.06         | 0.40    | -0.06          | 0.25    | -     | -       | -      | -       | -     | -       | -           | -       | -     | -       |
| weight excess at diuretic therapy       | 0.24          | 0.001*  | 0.16           | 0.16    | 0.07  | 0.62    | 0.06   | 0.30    | -     | -       | -           | -       | -     | -       |
| first diuretic dose                     | 0.003         | 0.61    | 0.04           | 0.35    | -0.22 | 0.12    | 0.02   | 0.76    | -     | -       | -           | -       | -     | -       |
| use of continuous intravenous diuretics | -0.16         | 0.02*   | 0.09           | 0.08    | 0.09  | 0.61    | 0.01   | 0.84    | -     | -       | -           | -       | -     | -       |
| AKI 1                                   | -0.07         | 0.31    | -0.02          | 0.70    | 0.13  | 0.37    | 0.10   | 0.10    | -     | -       | -           | -       | -     | -       |
| AKI 2                                   | 0.04          | 0.57    | 0.04           | 0.43    | -     | 0.98    | 0.04   | 0.53    | -     | -       | -           | -       | -     | -       |
| AKI 3                                   | -0.02         | 0.73    | 0.01           | 0.77    | 0.003 | -       | 0.05   | 0.39    | -     | -       | -           | -       | -     | -       |
| admission through the emergency room    | -0.12         | 0.08    | -0.04          | 0.42    | 0.07  | 0.61    | 0.08   | 0.17    | -     | -       | -           | -       | -     | -       |

\* violation of the proportional hazard assumption (p value <0.05). AKI: acute kidney injury; CPAP: continuous positive airways pressure therapy; I.V.: intravenous; LVEF: Left ventricular ejection fraction; UTI: urinary tract infection.

1  
2  
3  
4  
5  
6  
7  
8  
9  
10  
11  
12  
13  
14  
15  
16  
17  
18  
19  
20  
21  
22  
23  
24  
25  
26  
27  
28  
29  
30  
31  
32  
33  
34  
35  
36  
37  
38  
39  
40  
41  
42  
43  
44  
45  
46  
47  
48  
49  
50  
51  
52  
53  
54  
55  
56  
57  
58  
59  
60

*Table S5: Sensitive analysis for the model on time to reach target weight and CPAP, including time-varying covariates. Number are HR (95%CI)*

|                         | Time to target weight         |                                        | Time to discontinue CPAP       |                                        |
|-------------------------|-------------------------------|----------------------------------------|--------------------------------|----------------------------------------|
|                         | Standard Cox regression model | Cox with time-varying covariates model | Standard Cox regression model, | Cox with time-varying covariates model |
| Urinary catheter        | 1.0 (0.7-1.5)                 | 1.0 (0.7-1.4)                          | 1.1 (0.5-2.4)                  | 1.1 (0.5-2.3)                          |
| Age                     | 1.0 (1.0-1.0)                 | 1.0 (1.0-1.0)                          | 1.0 (0.9-1.0)                  | 1.0 (0.9-1.0)                          |
| Sex                     | 0.7 (0.5-1.0)                 | 0.7 (0.5-1.0)                          | 1.4 (0.7-2.8)                  | 1.4 (0.7-2.8)                          |
| Systolic blood pressure | 1.0 (1.0-1.0)                 | 1.0 (1.0-1.0)                          | 1.0 (1.0-1.0)                  | 1.0 (1.0-1.0)                          |
| Heart rate              | 1.0 (1.0-1.0)                 | 1.0 (1.0-1.0)                          | 1.0 (1.0-1.0)                  | 1.0 (1.0-1.0)                          |
| Respiratory failure     | 0.9 (0.6-1.4)                 | 0.9 (0.6-1.4)                          | -                              | -                                      |
| Reduced LVEF            | 1.0 (0.6-1.4)                 | 1.8 (0.9-3.6)                          | 0.7 (0.3-1.5)                  | 0.7 (0.3-1.5)                          |
| Severity not assessed   | 1.9 (1.2-2.8)*                | 1.8 (1.2-2.7)                          | 0.8 (0.3-2.2)                  | 0.9 (0.3-2.3)                          |
| Charlson                | 1.0 (0.9-1.1)                 | 1.0 (0.9-1.1)                          | 1.0 (0.8-1.3)                  | 1.4 (0.9-2.1)                          |
| Weight excess           | 0.6 (0.5-0.6)*                | 0.4 (0.3-0.5)*                         | 1.0 (0.9-1.1)                  | 1.0 (0.9-1.1)                          |
| Chronic diuretic        | 1.0 (1.0-1.0)                 | 1.0 (1.0-1.0)                          | 1.0 (1.0-1.0)                  | 1.0 (1.0-1.0)                          |
| Initial diuretic        | 1.0 (1.0-1.0)                 | 1.0 (1.0-1.0)                          | 1.0 (1.0-1.0)                  | 1.0 (1.0-1.0)                          |
| Continuous IV           | 1.7 (0.9-3.2)                 | 5.1 (1.7-15.7)*                        | 0.3 (0.1-2.1)                  | 0.3 (0.1-2.4)                          |
| Elective admission      | 1.0 (0.6-1.8)                 | 1.0 (0.5-1.6)                          | 0.6 (0.1-2.7)                  | 0.7 (0.1-3.1)                          |
| AKIN 1                  | 0.9 (0.6-1.3)                 | 0.9 (0.6-1.3)                          | 1.7 (0.8-3.9)                  | 1.6 (0.7-3.7)                          |
| AKIN 2                  | 1.1 (0.5-2.6)                 | 1.0 (0.5-2.3)                          | 1.6 (0.6-4.7)                  | 1.4 (0.5-4.2)                          |
| AKIN 3                  | 1.1 (0.4-3.4)                 | 1.2 (0.4-3.6)                          | -                              | -                                      |
| Time varying covariates |                               |                                        |                                |                                        |
| Reduced LVEF            |                               | 0.8 (0.7-0.9)*                         |                                | -                                      |
| Weight excess           |                               | 1.1 (1.0-1.2)*                         |                                | -                                      |
| Continuous IV           |                               | 0.7 (0.5-0.9)*                         |                                | -                                      |
| Charlson                |                               | -                                      |                                | 0.9 (0.8-1.0)                          |

\*p value <0.05  
AKI: acute kidney injury; CPAP: continuous positive airways pressure therapy; I.V.: intravenous; LVEF: Left ventricular ejection fraction; UTI: urinary tract infection.

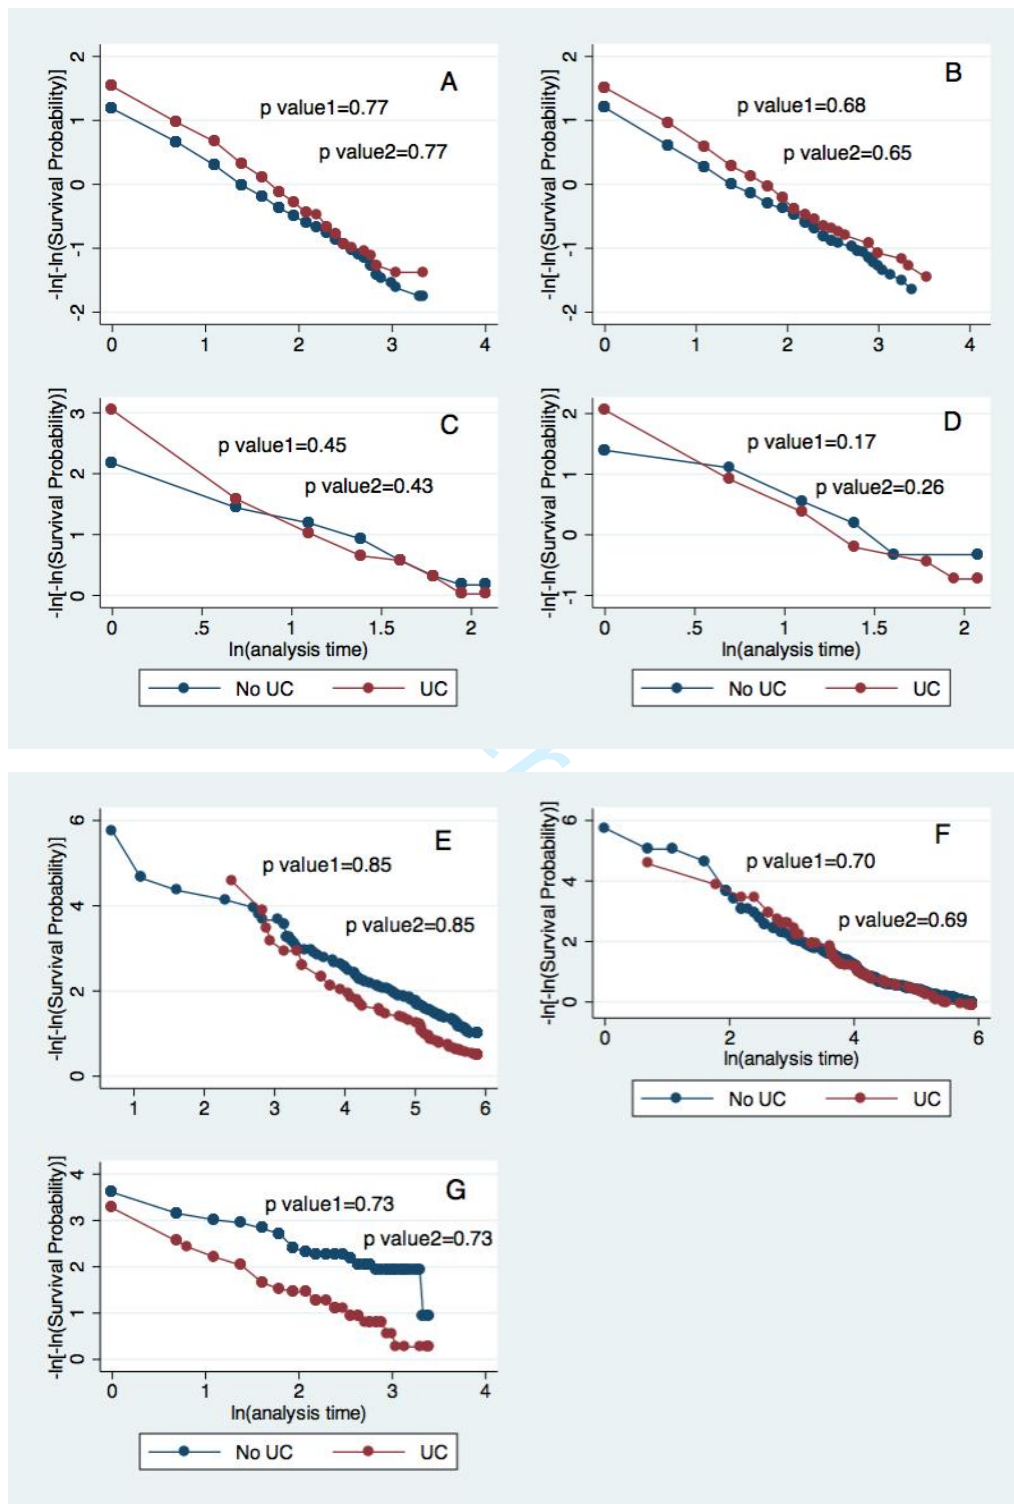

Figure S2.: log-minus-log plots for urinary catheter (UC) and the different time to event outcomes. Two tests were also used to assess the proportional hazard assumption: first the Schoenfeld residuals (**p value1**) and, second, the interaction between “urinary catheter” and time in a time-varying covariate cox regression (**p value2**). For the tow tests the p value need to be more than 0.05. **Panel A:** time to stop intravenous diuretic therapy; **Panel B:** time to stop oxygen supply; **Panel C:** time to reach target weight; **Panel D:** time to stop CPAP therapy; **Panel E:** time to death; **Panel F:** time to first hospital readmission; **Panel G:** time to first urinary tract infection.

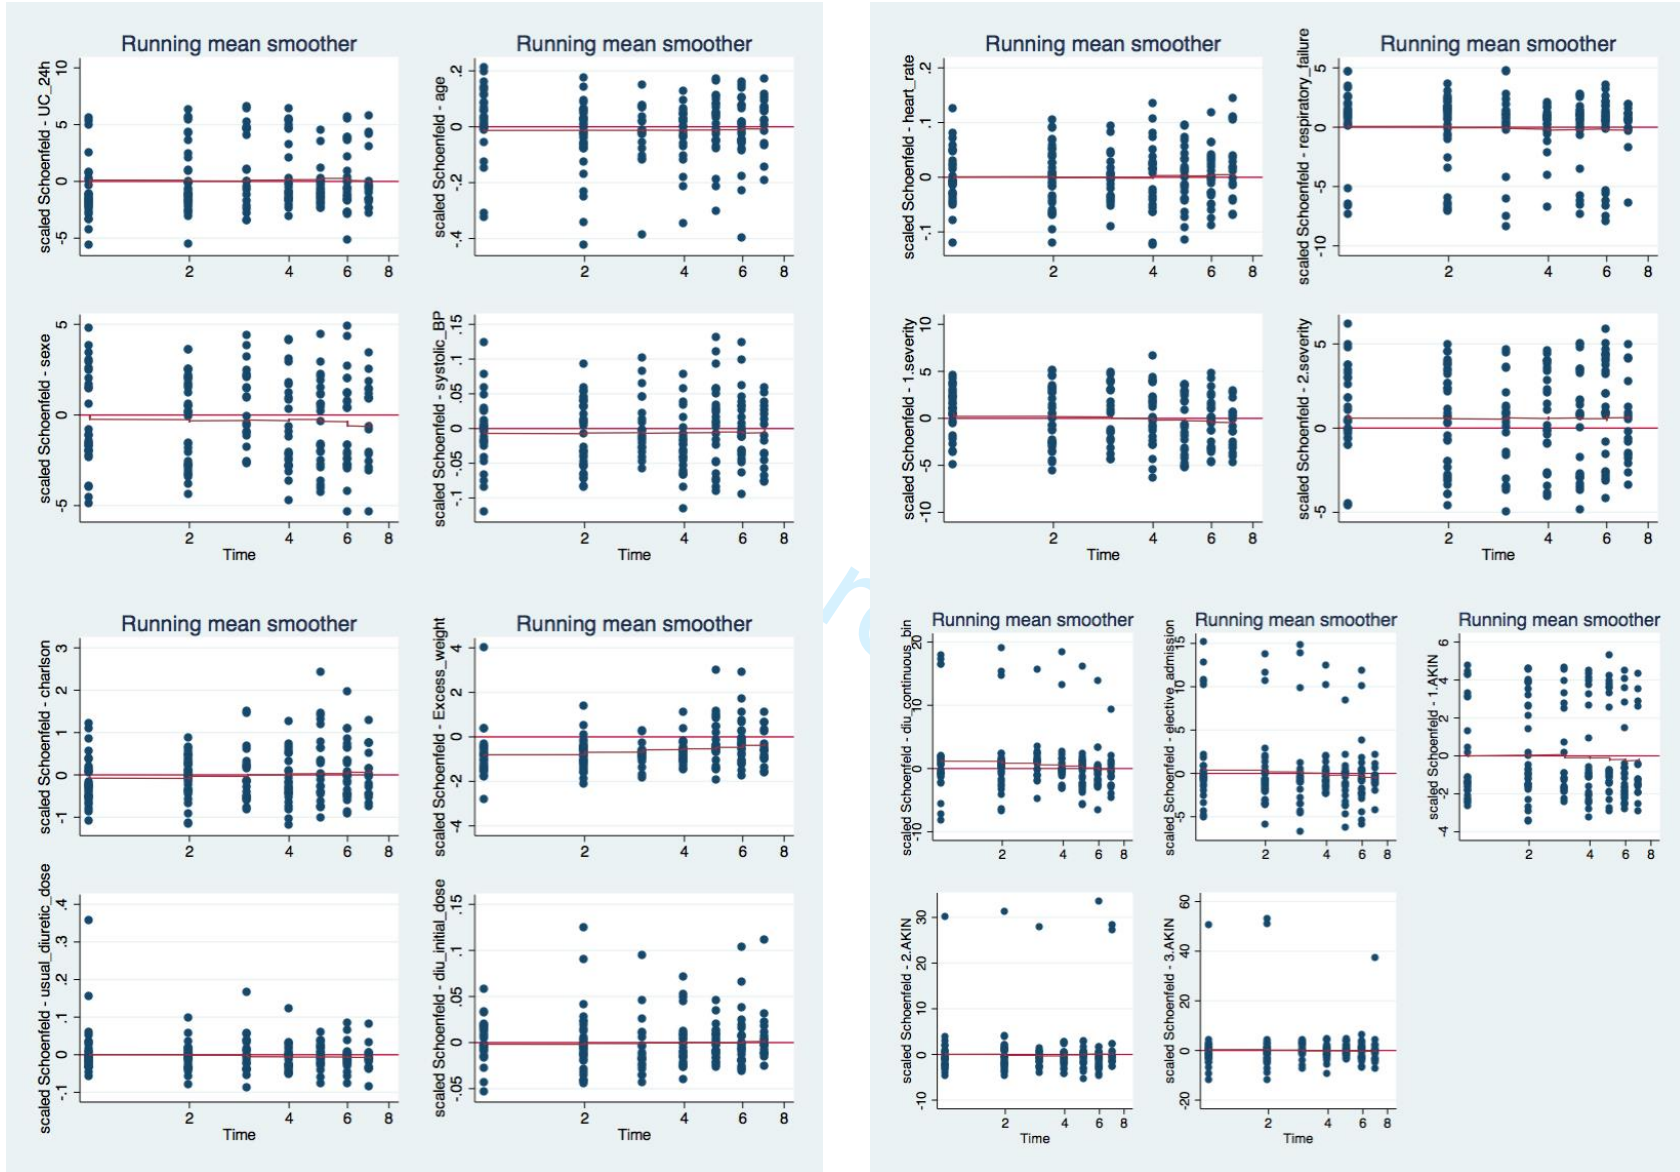

Figure S3: Schoenfeld residuals plots over Time for urinary catheterisation (UC) and covariates in the model for time to reach target weight.



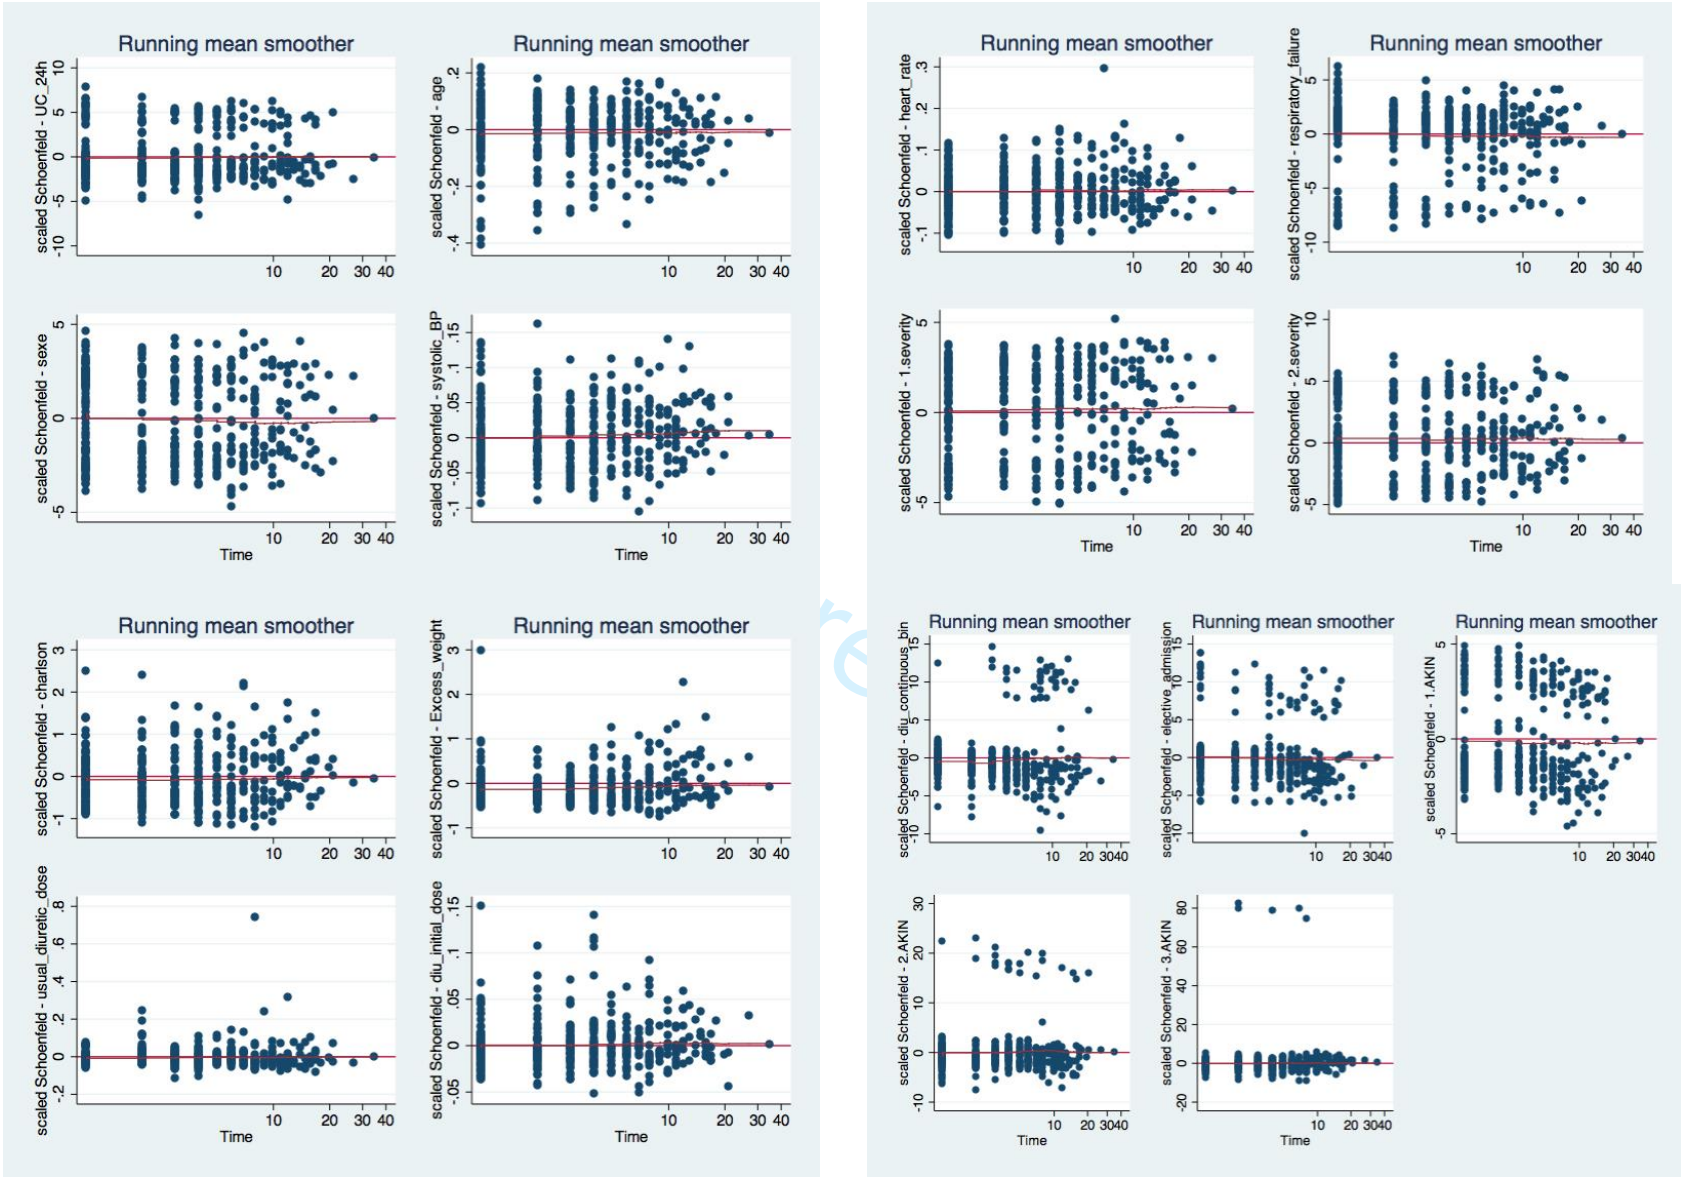

Figure S4: Schoenfeld residuals plots over Time for urinary catheter (UC) and covariates in the model of time for discontinue intravenous diuretic therapy.

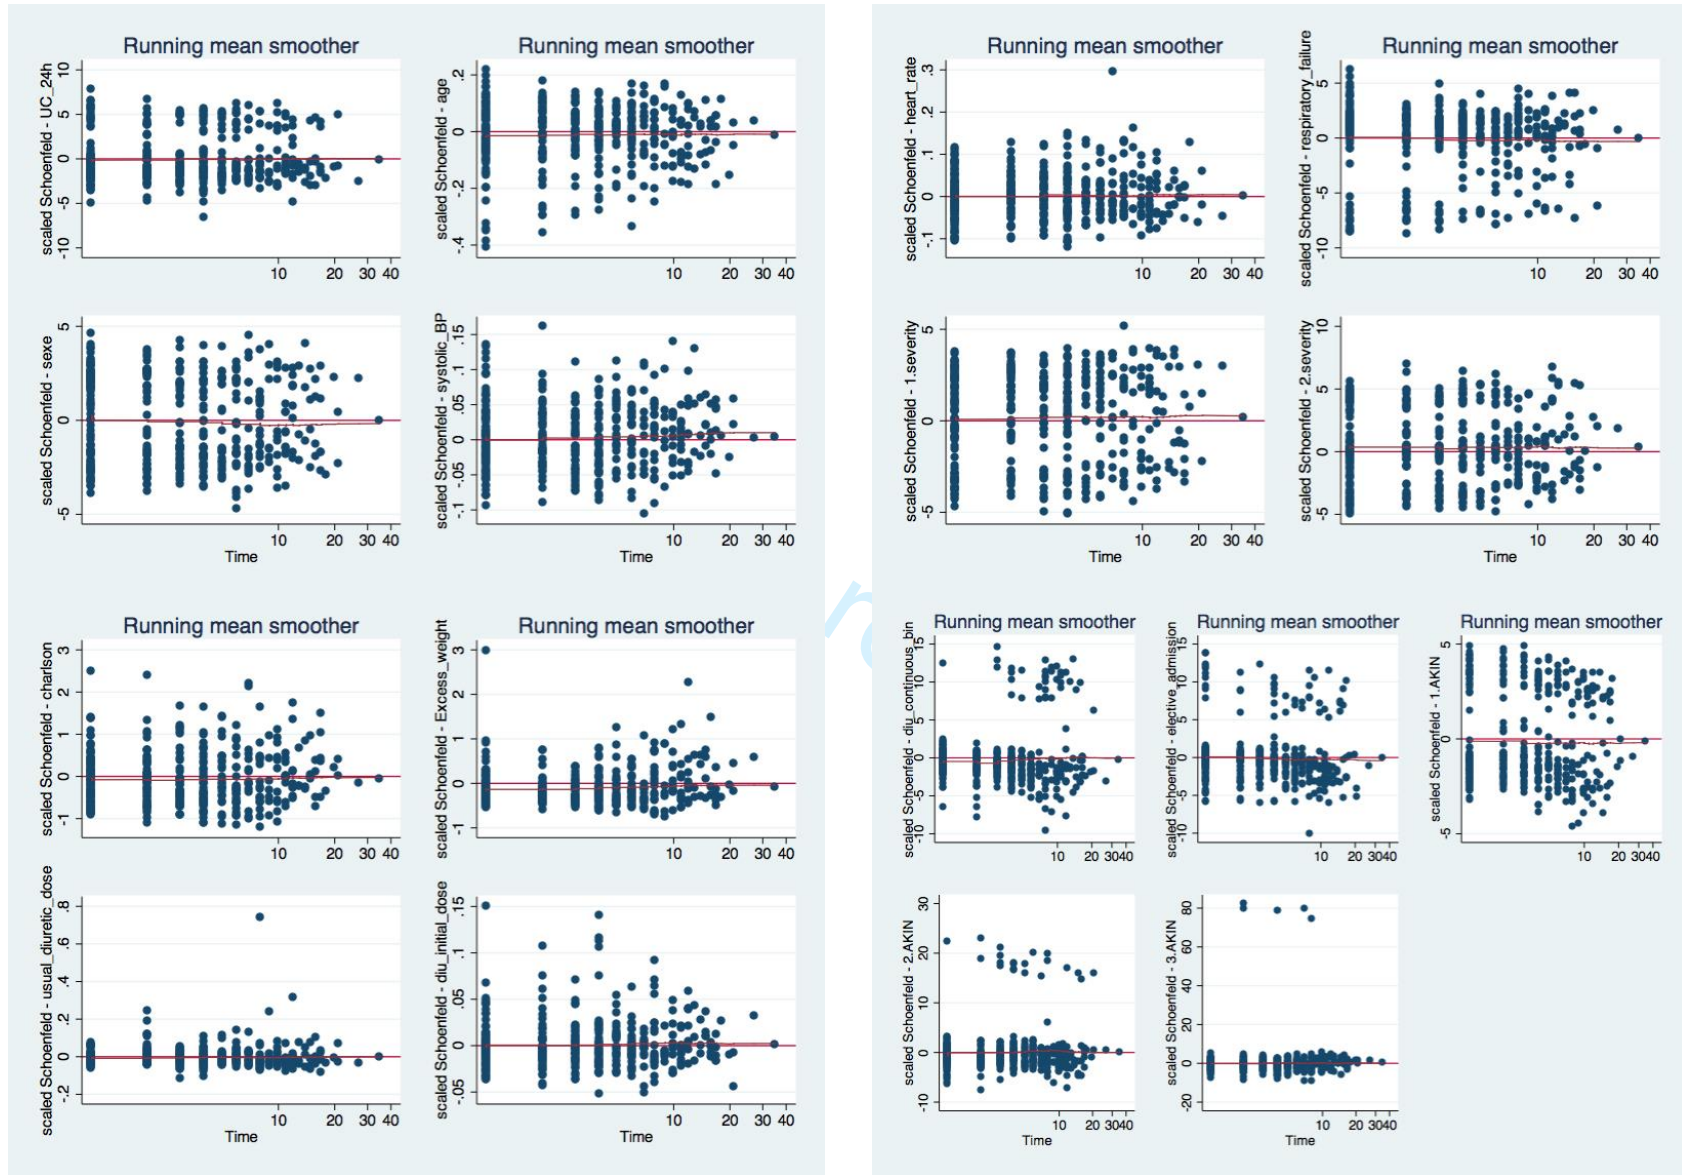

Figure S5: Schoenfeld residuals plots over Time for urinary catheter (UC) and covariates in the model of time to discontinue CPAP.

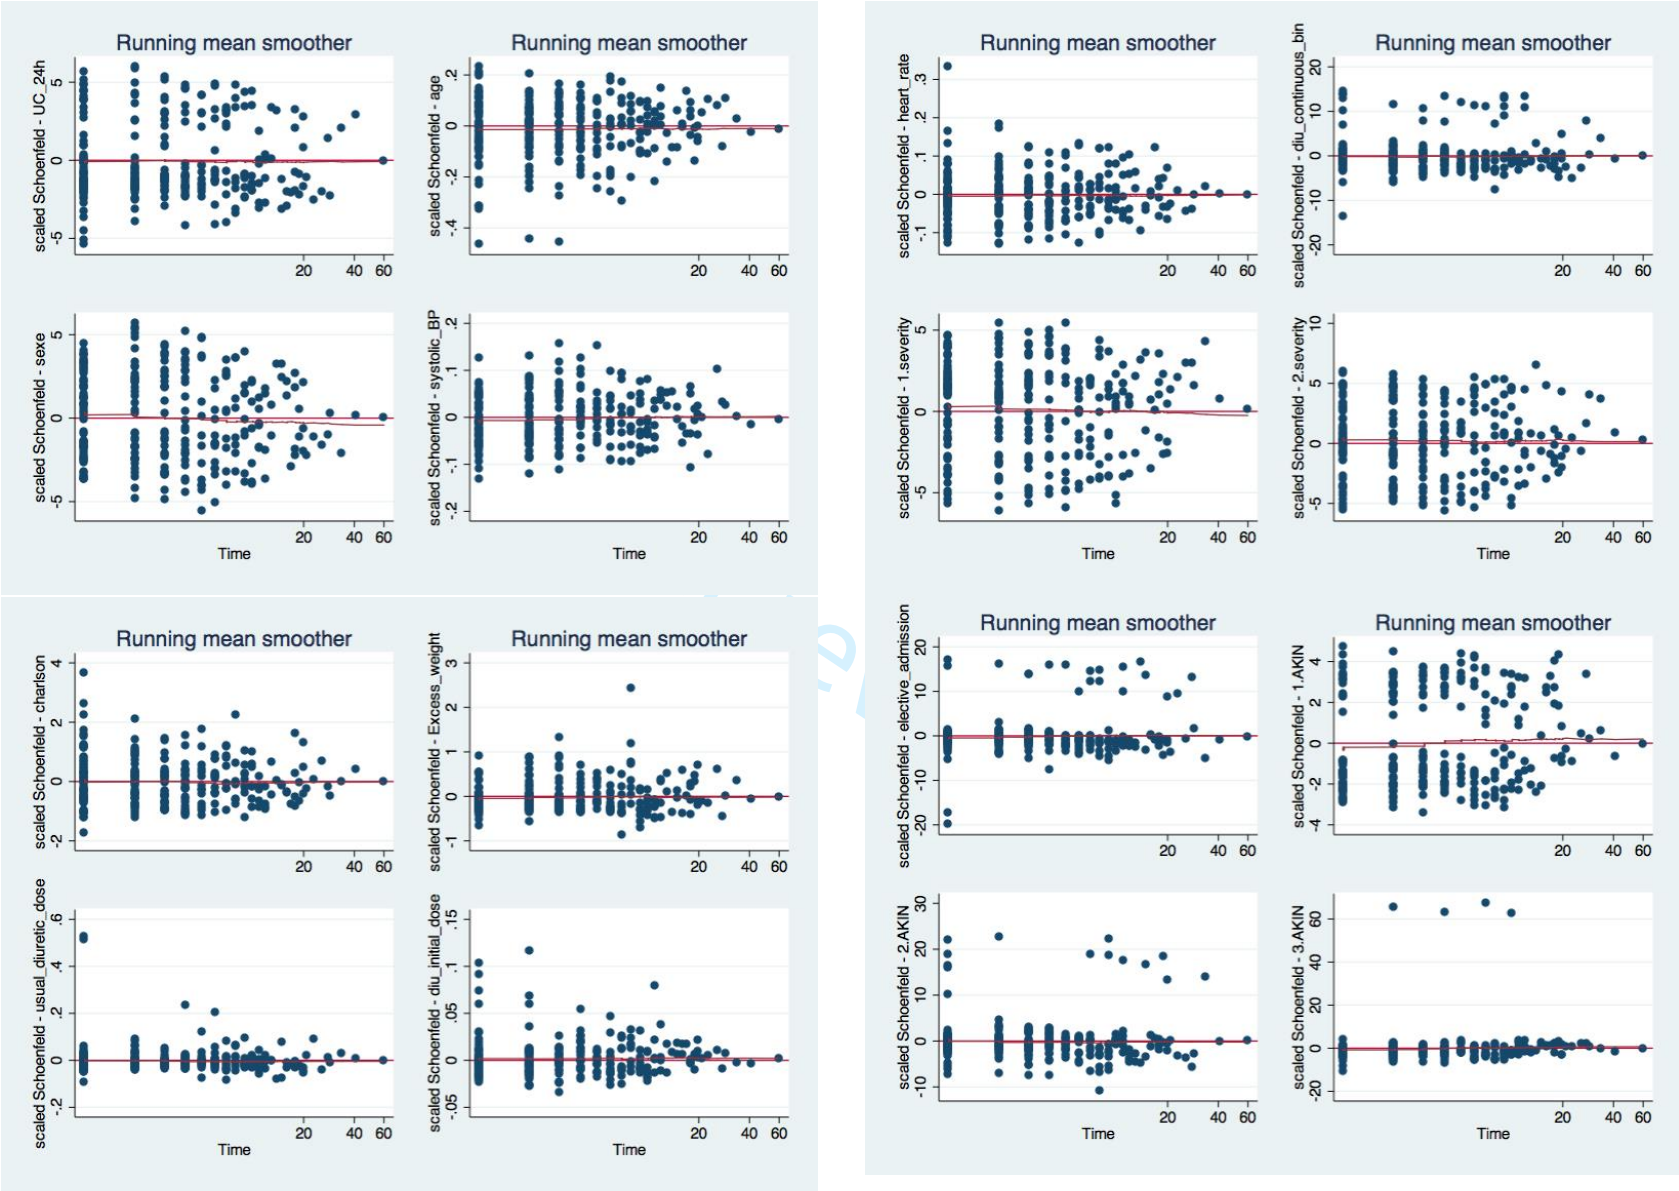

Figure S6: Schoenfeld residuals plots over Time for urinary catheter (UC) and covariates in the model for time until oxygen supply discontinuation.

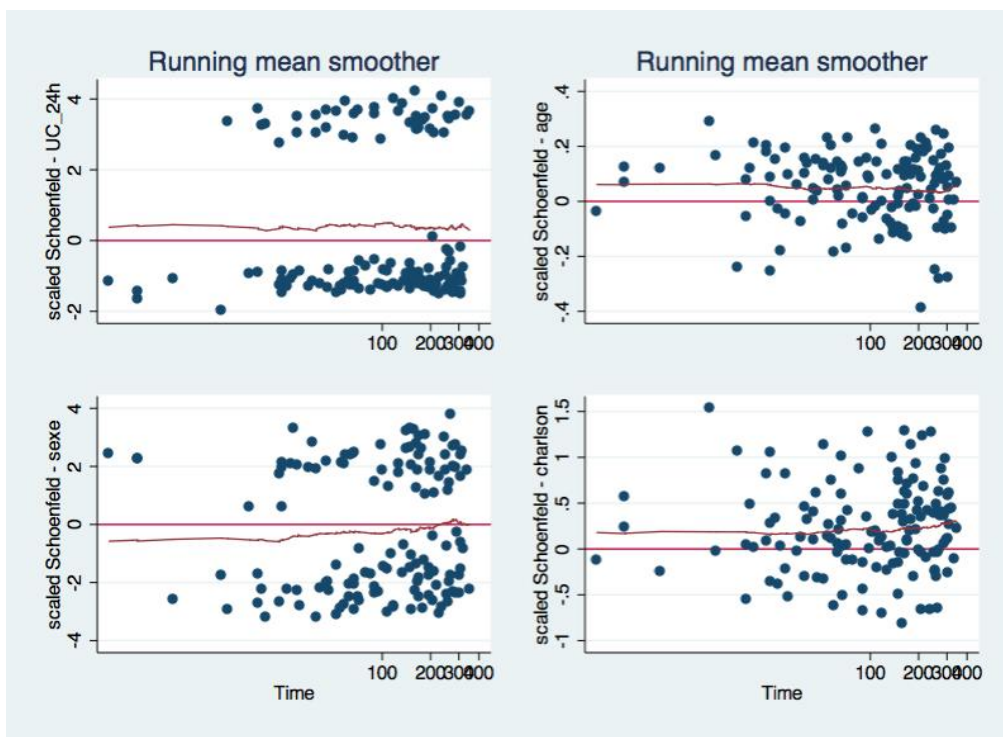

Figure S7: Schoenfeld residuals plots over Time for urinary catheter (UC) and covariates in the model for time to death.

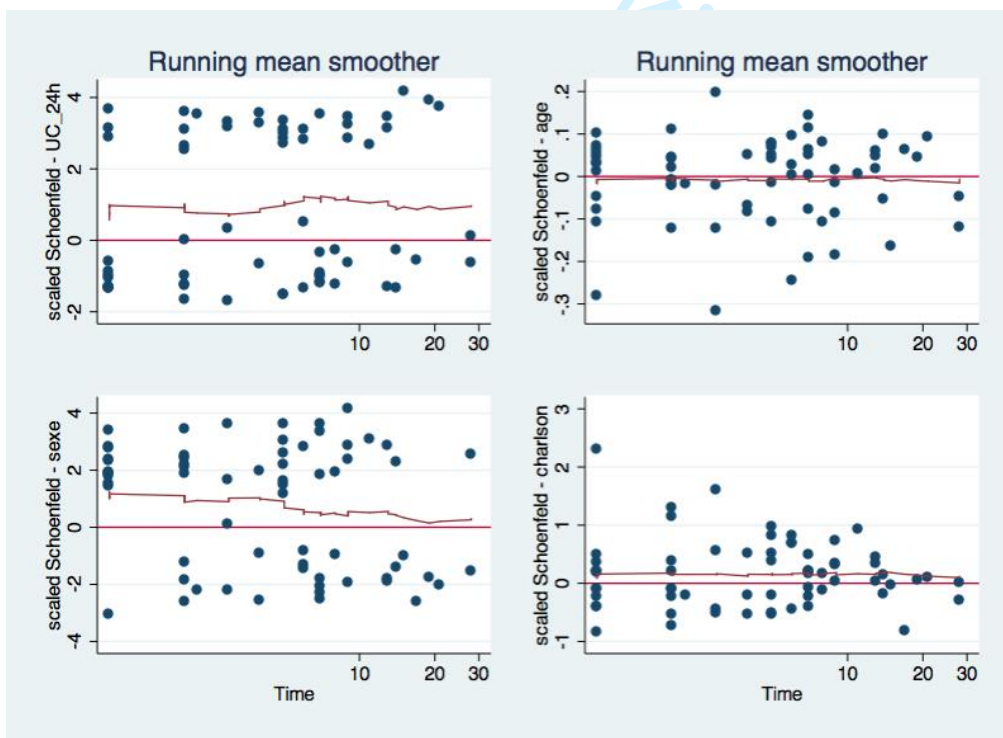

Figure S8: Schoenfeld residuals plots over Time for urinary catheter (UC) and covariates in the model for time to first urinary tract infection.

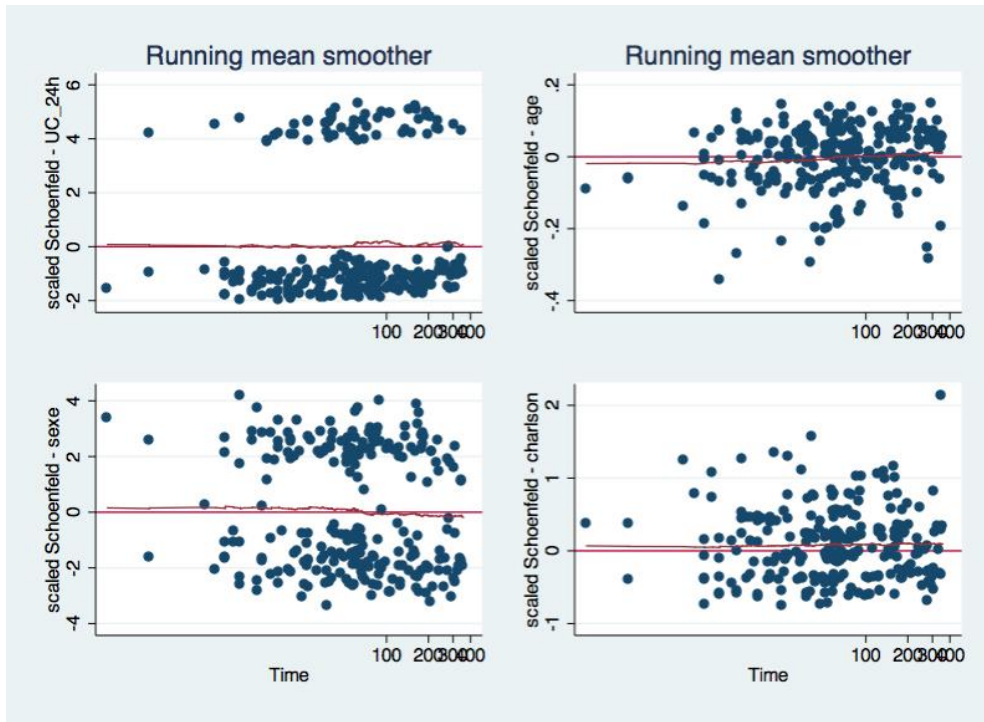

Figure S9: Schoenfeld residuals plots over Time for urinary catheter (UC) and covariates in the model for time to first hospital readmission.

## References:

1. Ezekowitz JA, O'Meara E, McDonald MA, Abrams H, Chan M, Ducharme A, et al. 2017 Comprehensive Update of the Canadian Cardiovascular Society Guidelines for the Management of Heart Failure. *Can J Cardiol* 2017;33(11):1342-433.
2. Felker GM, Lee KL, Bull DA, Redfield MM, Stevenson LW, Goldsmith SR, et al. Diuretic strategies in patients with acute decompensated heart failure. *N Engl J Med* 2011;364(9):797-805.
3. Sanderson JE. Factors related to outcome in heart failure with a preserved (or normal) left ventricular ejection fraction. *Eur Heart J Qual Care Clin Outcomes* 2016;2(3):153-63.
4. DeVore AD, Hill CL, Thomas LE, Albert NM, Butler J, Patterson JH, et al. Identifying patients at increased risk for poor outcomes from heart failure with reduced ejection fraction: the PROMPT-HF risk model. *ESC Heart Fail* 2022;9(1):178-85.
5. Allison PD. *Survival analysis using SAS. A practical guide, second edition*. USA: SAS Institute Inc. Cary, NC, USA, 2010.
6. ter Maaten JM, Dunning AM, Valente MA, Damman K, Ezekowitz JA, Califf RM, et al. Diuretic response in acute heart failure-an analysis from ASCEND-HF. *Am Heart J* 2015;170(2):313-21.
7. Voors AA, Davison BA, Teerlink JR, Felker GM, Cotter G, Filippatos G, et al. Diuretic response in patients with acute decompensated heart failure: characteristics and clinical outcome--an analysis from RELAX-AHF. *Eur J Heart Fail* 2014;16(11):1230-40.
8. Shah RV, McNulty S, O'Connor CM, Felker GM, Braunwald E, Givertz MM. Effect of admission oral diuretic dose on response to continuous versus bolus intravenous diuretics in acute heart failure: an analysis from diuretic optimization strategies in acute heart failure. *Am Heart J* 2012;164(6):862-8.
9. Schweiger A, Kuster SP, Maag J, Züllig S, Bertschy S, Bortolin E, et al. Impact of an evidence-based intervention on urinary catheter utilization, associated process indicators, and infectious and non-infectious outcomes. *J Hosp Infect* 2020;106(2):364-71.

STROBE Statement—checklist of items that should be included in reports of observational studies

|                           | Item No. | Recommendation                                                                                                                                                                                                                                                                                                                                                                                                                                                         | Page No.                     | Relevant text from manuscript |
|---------------------------|----------|------------------------------------------------------------------------------------------------------------------------------------------------------------------------------------------------------------------------------------------------------------------------------------------------------------------------------------------------------------------------------------------------------------------------------------------------------------------------|------------------------------|-------------------------------|
| <b>Title and abstract</b> | 1        | (a) Indicate the study’s design with a commonly used term in the title or the abstract                                                                                                                                                                                                                                                                                                                                                                                 | 1, 2                         |                               |
|                           |          | (b) Provide in the abstract an informative and balanced summary of what was done and what was found                                                                                                                                                                                                                                                                                                                                                                    | 2,3                          |                               |
| <b>Introduction</b>       |          |                                                                                                                                                                                                                                                                                                                                                                                                                                                                        |                              |                               |
| Background/rationale      | 2        | Explain the scientific background and rationale for the investigation being reported                                                                                                                                                                                                                                                                                                                                                                                   | 4                            |                               |
| Objectives                | 3        | State specific objectives, including any prespecified hypotheses                                                                                                                                                                                                                                                                                                                                                                                                       | 5                            |                               |
| <b>Methods</b>            |          |                                                                                                                                                                                                                                                                                                                                                                                                                                                                        |                              |                               |
| Study design              | 4        | Present key elements of study design early in the paper                                                                                                                                                                                                                                                                                                                                                                                                                | 5                            |                               |
| Setting                   | 5        | Describe the setting, locations, and relevant dates, including periods of recruitment, exposure, follow-up, and data collection                                                                                                                                                                                                                                                                                                                                        | 5                            |                               |
| Participants              | 6        | (a) <i>Cohort study</i> —Give the eligibility criteria, and the sources and methods of selection of participants. Describe methods of follow-up<br><i>Case-control study</i> —Give the eligibility criteria, and the sources and methods of case ascertainment and control selection. Give the rationale for the choice of cases and controls<br><i>Cross-sectional study</i> —Give the eligibility criteria, and the sources and methods of selection of participants | 5-6                          |                               |
|                           |          | (b) <i>Cohort study</i> —For matched studies, give matching criteria and number of exposed and unexposed<br><i>Case-control study</i> —For matched studies, give matching criteria and the number of controls per case                                                                                                                                                                                                                                                 | 10                           |                               |
| Variables                 | 7        | Clearly define all outcomes, exposures, predictors, potential confounders, and effect modifiers. Give diagnostic criteria, if applicable                                                                                                                                                                                                                                                                                                                               | 6-7                          |                               |
| Data sources/ measurement | 8*       | For each variable of interest, give sources of data and details of methods of assessment (measurement). Describe comparability of assessment methods if there is more than one group                                                                                                                                                                                                                                                                                   | 6-8                          |                               |
| Bias                      | 9        | Describe any efforts to address potential sources of bias                                                                                                                                                                                                                                                                                                                                                                                                              | 9 and supplements statistics |                               |

1  
2  
3  
4  
5  
6  
7  
8  
9  
10  
11  
12  
13  
14  
15  
16  
17  
18  
19  
20  
21  
22  
23  
24  
25  
26  
27  
28  
29  
30  
31  
32  
33  
34  
35  
36  
37  
38  
39  
40  
41  
42  
43  
44  
45  
46

---

|            |    |                                           |             |
|------------|----|-------------------------------------------|-------------|
| Study size | 10 | Explain how the study size was arrived at | supplements |
|            |    |                                           | statistics  |

---

Continued on next page

For peer review only



|    |                  |     |                                                                                                      |              |
|----|------------------|-----|------------------------------------------------------------------------------------------------------|--------------|
| 1  |                  |     |                                                                                                      |              |
| 2  | Quantitative     | 11  | Explain how quantitative variables were handled in the analyses. If applicable, describe which       | 9-10         |
| 3  | variables        |     | groupings were chosen and why                                                                        |              |
| 4  |                  |     |                                                                                                      |              |
| 5  | Statistical      | 12  | (a) Describe all statistical methods, including those used to control for confounding                | 9-11         |
| 6  | methods          |     | (b) Describe any methods used to examine subgroups and interactions                                  | NA           |
| 7  |                  |     | (c) Explain how missing data were addressed                                                          | 6 and 9      |
| 8  |                  |     | (d) <i>Cohort study</i> —If applicable, explain how loss to follow-up was addressed                  | 10-11        |
| 9  |                  |     | <i>Case-control study</i> —If applicable, explain how matching of cases and controls was addressed   |              |
| 10 |                  |     | <i>Cross-sectional study</i> —If applicable, describe analytical methods taking account of sampling  |              |
| 11 |                  |     | strategy                                                                                             |              |
| 12 |                  |     | (e) Describe any sensitivity analyses                                                                | 9 and        |
| 13 |                  |     |                                                                                                      | supplemental |
| 14 |                  |     |                                                                                                      | statistics   |
| 15 |                  |     |                                                                                                      |              |
| 16 |                  |     |                                                                                                      |              |
| 17 |                  |     |                                                                                                      |              |
| 18 | <b>Results</b>   |     |                                                                                                      |              |
| 19 | Participants     | 13* | (a) Report numbers of individuals at each stage of study—eg numbers potentially eligible, examined   | 11-12,       |
| 20 |                  |     | for eligibility, confirmed eligible, included in the study, completing follow-up, and analysed       | table1-2,    |
| 21 |                  |     |                                                                                                      | supplemental |
| 22 |                  |     |                                                                                                      | flow chart   |
| 23 |                  |     | (b) Give reasons for non-participation at each stage                                                 | supplemental |
| 24 |                  |     |                                                                                                      | flow chart   |
| 25 |                  |     | (c) Consider use of a flow diagram                                                                   | supplemental |
| 26 |                  |     |                                                                                                      | flow chart   |
| 27 |                  |     |                                                                                                      |              |
| 28 |                  |     |                                                                                                      |              |
| 29 | Descriptive data | 14* | (a) Give characteristics of study participants (eg demographic, clinical, social) and information on | Table 1      |
| 30 |                  |     | exposures and potential confounders                                                                  |              |
| 31 |                  |     | (b) Indicate number of participants with missing data for each variable of interest                  | 12           |
| 32 |                  |     | (c) <i>Cohort study</i> —Summarise follow-up time (eg, average and total amount)                     | Figure2-3    |
| 33 |                  |     |                                                                                                      |              |
| 34 | Outcome data     | 15* | <i>Cohort study</i> —Report numbers of outcome events or summary measures over time                  | Figure2-3    |
| 35 |                  |     | <i>Case-control study</i> —Report numbers in each exposure category, or summary measures of exposure | NA           |
| 36 |                  |     | <i>Cross-sectional study</i> —Report numbers of outcome events or summary measures                   |              |
| 37 |                  |     |                                                                                                      |              |
| 38 | Main results     | 16  | (a) Give unadjusted estimates and, if applicable, confounder-adjusted estimates and their precision  | Table2       |
| 39 |                  |     | (eg, 95% confidence interval). Make clear which confounders were adjusted for and why they were      |              |
| 40 |                  |     | included                                                                                             |              |
| 41 |                  |     |                                                                                                      |              |
| 42 |                  |     |                                                                                                      |              |
| 43 |                  |     |                                                                                                      |              |
| 44 |                  |     |                                                                                                      |              |
| 45 |                  |     |                                                                                                      |              |
| 46 |                  |     |                                                                                                      |              |

---

(b) Report category boundaries when continuous variables were categorized

---

(c) If relevant, consider translating estimates of relative risk into absolute risk for a meaningful time period

---

Continued on next page

For peer review only

|                          |    |                                                                                                                                                                            |                          |
|--------------------------|----|----------------------------------------------------------------------------------------------------------------------------------------------------------------------------|--------------------------|
| Other analyses           | 17 | Report other analyses done—eg analyses of subgroups and interactions, and sensitivity analyses                                                                             | 12 and supplemental data |
| <b>Discussion</b>        |    |                                                                                                                                                                            |                          |
| Key results              | 18 | Summarise key results with reference to study objectives                                                                                                                   | 14                       |
| Limitations              | 19 | Discuss limitations of the study, taking into account sources of potential bias or imprecision. Discuss both direction and magnitude of any potential bias                 | 15-16                    |
| Interpretation           | 20 | Give a cautious overall interpretation of results considering objectives, limitations, multiplicity of analyses, results from similar studies, and other relevant evidence | 15-16                    |
| Generalisability         | 21 | Discuss the generalisability (external validity) of the study results                                                                                                      | 16                       |
| <b>Other information</b> |    |                                                                                                                                                                            |                          |
| Funding                  | 22 | Give the source of funding and the role of the funders for the present study and, if applicable, for the original study on which the present article is based              | 21                       |

\*Give information separately for cases and controls in case-control studies and, if applicable, for exposed and unexposed groups in cohort and cross-sectional studies.

**Note:** An Explanation and Elaboration article discusses each checklist item and gives methodological background and published examples of transparent reporting. The STROBE checklist is best used in conjunction with this article (freely available on the Web sites of PLoS Medicine at <http://www.plosmedicine.org/>, Annals of Internal Medicine at <http://www.annals.org/>, and Epidemiology at <http://www.epidem.com/>). Information on the STROBE Initiative is available at [www.strobe-statement.org](http://www.strobe-statement.org).
